# Supplementary material for: Synthesis of C3-alkylated benzofurans via palladium-catalyzed regiocontrolled hydro-furanization of unactivated alkenes
Source: Royal Society of Chemistry journal article supplement (doi:10.1039/d0qo01247e), 2020-11-17
Supplement: d0qo01247e1.pdf [file d0qo01247e1.pdf]

## Supporting Information

### Synthesis of C<sub>3</sub>-alkylated benzofurans via palladium-catalyzed regiocontrolled hydro-furanization of unactivated alkenes

Chi-Fan Zhu,<sup>a</sup> Cong-Hui Gao,<sup>b</sup> Wen-Juan Hao,<sup>b</sup> Yi-Long Zhu,<sup>\*a</sup> Shu-Jiang Tu,<sup>b</sup> De-Cai Wang,<sup>\*a</sup> Bo Jiang<sup>\*b</sup>

<sup>a</sup>School of Pharmaceutical, Nanjing Tech University, Nanjing, 210009, Jiangsu, P. R. China. E-mail: dcwang@njtech.edu.cn, zhuyilong\_88@njtech.edu.cn

<sup>b</sup>School of Chemistry & Materials Science, Jiangsu Key Laboratory of Green Synthetic Chemistry for Functional Materials, Jiangsu Normal University, Xuzhou 221116, P. R. China. E-mail: jiangchem@jnsu.edu.cn (BJ) Fax: +8651683500065; Tel: +8651683500065

### Context

|                                                                                            |         |
|--------------------------------------------------------------------------------------------|---------|
| General Information.....                                                                   | S2      |
| General Procedure for the Synthesis of Compounds <b>3</b> .....                            | S2      |
| The Procedure for the Synthesis of Compounds <b>6</b> .....                                | S2      |
| Characterization Data of Compounds <b>6</b> .....                                          | S2      |
| Characterization Data of Compounds <b>3a-3bb</b> .....                                     | S2-S10  |
| Copies of <sup>1</sup> H and <sup>13</sup> C NMR Spectra for Compounds <b>3a-3bb</b> ..... | S11-S66 |
| Copies of <sup>1</sup> H and <sup>13</sup> C NMR Spectra for Compounds <b>6</b> .....      | S67-S68 |

## General Information

$^1\text{H}$  NMR ( $^{13}\text{C}$  NMR) spectra were measured on a Bruker DPX 400 MHz spectrometer in  $\text{CDCl}_3$  ( $\text{DMSO-}d_6$ ) with chemical shift ( $\delta$ ) given in ppm relative to TMS as internal standard [(s = singlet, d = doublet, t = triplet, brs = broad singlet, m = multiplet), coupling constant (Hz)]. HRMS (ESI) was determined by using microTOF-QII HRMS/MS instrument (BRUKER). X-Ray crystallographic analysis was performed with a Siemens SMART CCD and a Siemens P4 diffractometer.

### General procedure for the synthesis of compounds 3

Example for the synthesis of **3**:

In a flame-dried Schlenk tube along with a stir bar under argon conditions, alkene (**1a**, 0.2 mmol, 42.4 mg), 2-(phenylethynyl)phenol (**2a**, 0.24 mmol, 46.6 mg) or 1-(phenylethynyl)naphthalen-2-ol (**4a**, 0.24 mmol, 58.6 mg) and  $\text{Pd}(\text{OAc})_2$  (4.48 mg, 0.02 mmol) was added into the tube and then dry DCE (1 mL) was injected into the reaction system. Subsequently, the tube was stirred at room temperature. After stirring for 12 hours, the reaction mixture was concentrated by vacuum distillation and was purified by flash column chromatography (ethyl acetate/petroleum ether = 1:10 (V/V)) to afford the desired pure product **3a**.

### The procedure for the synthesis of compound 6:

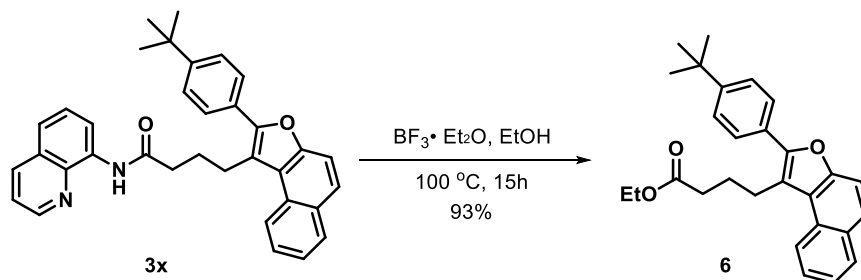

To a dry tube was added a mixture of **3x** (51.2 mg, 0.10 mmol, 1.0 equiv), anhydrous EtOH (1.0 mL), followed by the addition of  $\text{BF}_3 \cdot \text{Et}_2\text{O}$  (75  $\mu\text{L}$ , 0.60 mmol, 6.0 equiv) at ambient temperature. The mixture was degassed three times with argon, and then allowed to stir at 100 °C. After 15 h, the reaction was cooled to ambient temperature. The mixture was diluted with dichloromethane and then quenched by  $\text{Et}_3\text{N}$  (0.14 mL, 1.0 mmol, 10 equiv). Rotary evaporation of the organic solvent and further purification by flash column chromatography (PE/EA = 20:1) afforded the desired products **6** in 93% (42.9 mg, 0.09 mmol) yield as colourless oil.  $^1\text{H}$  NMR (400 MHz,  $\text{CDCl}_3$ ) ( $\delta$ , ppm): 8.39 (d,  $J = 8.4$  Hz, 1H), 7.97 (d,  $J = 8.4$  Hz, 1H), 7.76–7.70 (m, 3H), 7.68–7.59 (m, 2H), 7.55–7.46 (m, 3H), 4.17–4.12 (m, 2H), 3.33–3.25 (m, 2H), 2.59–2.48 (m, 2H), 2.31–2.26 (m, 2H), 1.39 (s, 9H), 1.26–1.24 (m, 3H).  $^{13}\text{C}$  NMR (100 MHz,  $\text{CDCl}_3$ ) ( $\delta$ , ppm): 173.2, 152.0, 151.4, 151.3, 130.9, 129.3, 128.6, 128.4, 127.1, 126.4, 125.7, 125.6, 124.0, 123.1, 117.1, 112.4, 60.4, 34.8, 34.1, 31.3, 30.4, 29.7, 25.2, 22.7, 14.3.

### 4-(2-phenylbenzofuran-3-yl)-N-(quinolin-8-yl)butanamide(3a)

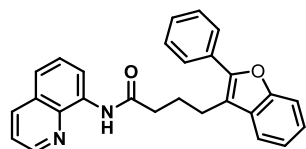

Yellowish oil; 71.5 mg, 88% yield;  $^1\text{H}$  NMR (400 MHz,  $\text{CDCl}_3$ ) ( $\delta$ , ppm): 9.78 (s, 1H), 8.85–8.76 (m, 2H), 8.18–8.12 (m, 2H), 7.81 (d,  $J = 7.6$  Hz, 2H), 7.67 (d,  $J = 7.6$  Hz, 1H), 7.63–7.53 (m, 2H), 7.52–7.42 (m, 4H), 7.39 (d,  $J = 8.0$  Hz, 1H), 7.30 (m, 1H), 3.27–2.97 (m, 2H), 2.85–2.53 (m, 2H), 2.43–2.08 (m, 2H).  $^{13}\text{C}$  NMR (100 MHz,  $\text{CDCl}_3$ ) ( $\delta$ , ppm): 171.3, 154.0, 151.1, 148.1, 138.3, 136.5, 134.4, 133.7, 131.2, 130.5, 130.2, 128.7, 128.5, 128.1, 128.0, 127.5, 126.9, 124.4, 122.5, 121.6, 119.8, 116.7, 115.4, 111.1, 37.5, 25.3, 23.7. IR (KBr,  $\nu$ ,  $\text{cm}^{-1}$ ): 2341, 1772, 1558, 1207, 1108, 959, 833, 750; HRMS (ESI -TOF)  $m/z$  calcd for  $\text{C}_{27}\text{H}_{21}\text{N}_2\text{O}_2$  [ $\text{M}-\text{H}$ ] $^-$  405.1603, found 5405.1610;

**4-(2-(2-chlorophenyl)benzofuran-3-yl)-N-(quinolin-8-yl)butanamide(3b)**

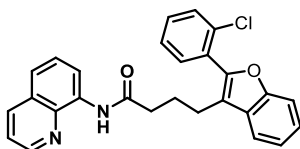

Yellowish oil; 63.4 mg, 72% yield; <sup>1</sup>H NMR (400 MHz, CDCl<sub>3</sub>) (δ, ppm): 9.70 (s, 1H), 8.78–8.80 (m, 1H), 8.70–8.72 (m, 1H), 8.15–8.18 (m, 1H), 7.75–7.69 (m, 1H), 7.55–7.48 (m, 4H), 7.48–7.40 (m, 2H), 7.35–7.26 (m, 3H), 7.23–7.25 (m, 1H), 2.90–2.82 (m, 2H), 2.53–2.57 (m, 2H), 2.24–2.16 (m, 2H). <sup>13</sup>C NMR (100 MHz, CDCl<sub>3</sub>) (δ, ppm): 171.2, 154.7, 149.7, 148.1, 134.6, 132.4, 130.5, 130.1, 130.1, 129.2, 128.0, 127.5, 126.7, 126.7, 126.7, 124.6, 122.6, 121.6, 121.4, 120.2, 117.6, 111.4, 111.4, 37.3, 25.0, 23.6. IR (KBr, ν, cm<sup>-1</sup>): 2342, 1765, 1563, 1211, 1101, 949, 836, 757; HRMS (ESI -TOF) m/z calcd for C<sub>27</sub>H<sub>20</sub>ClN<sub>2</sub>O<sub>2</sub> [M-H]<sup>-</sup> 439.1213, found 439.1209;

**4-(2-(4-chlorophenyl)benzofuran-3-yl)-N-(quinolin-8-yl)butanamide(3c)**

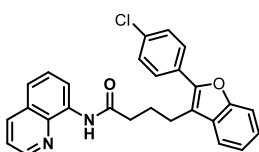

Yellowish oil; 78.3 mg, 89% yield; <sup>1</sup>H NMR (400 MHz, CDCl<sub>3</sub>) (δ, ppm): 9.80 (s, 1H), 8.83–8.76 (m, 2H), 8.21 (d, *J* = 8.0 Hz, 1H), 7.77–7.72 (m, 2H), 7.66 (d, *J* = 7.6 Hz, 1H), 7.53–7.60 (m, 2H), 7.47–7.50 (m, 2H), 7.34–7.28 (m, 3H), 7.23 (d, *J* = 7.2 Hz, 1H), 3.11–3.06 (m, 2H), 2.68–2.71 (m, 2H), 2.32–2.24 (m, 2H). <sup>13</sup>C NMR (100 MHz, CDCl<sub>3</sub>) (δ, ppm): 171.2, 154.7, 149.7, 148.1, 134.6, 132.4, 130.5, 130.1, 130.1, 129.2, 128.0, 127.5, 126.7, 126.7, 126.7, 124.6, 122.6, 121.6, 121.4, 120.2, 117.6, 111.4, 111.4, 37.3, 25.0, 23.6. IR (KBr, ν, cm<sup>-1</sup>): 2366, 1753, 1591, 1233, 1023, 966, 811, 763; HRMS (ESI -TOF) m/z calcd for C<sub>27</sub>H<sub>20</sub>ClN<sub>2</sub>O<sub>2</sub> [M-H]<sup>-</sup> 439.1213, found 439.1210;

**4-(2-([1,1'-biphenyl]-4-yl)benzofuran-3-yl)-N-(quinolin-8-yl)butanamide(3d)**

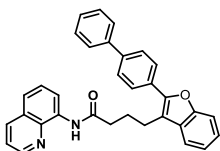

Yellowish oil; 82.9 mg, 86% yield; <sup>1</sup>H NMR (400 MHz, CDCl<sub>3</sub>) (δ, ppm): 9.78 (s, 1H), 8.82 (d, *J* = 7.2 Hz, 1H), 8.76–8.77 (m, 1H), 8.12–8.14 (m, 1H), 7.89 (d, *J* = 8.4 Hz, 2H), 7.68 (d, *J* = 7.2 Hz, 1H), 7.61 (d, *J* = 8.0 Hz, 2H), 7.53–7.57 (m, 3H), 7.52–7.49 (m, 1H), 7.48–7.36 (m, 5H), 7.32–7.27 (m, 1H), 7.24 (s, 1H), 3.20–3.12 (m, 2H), 2.70–2.73 (m, 2H), 2.39–2.29 (m, 2H). <sup>13</sup>C NMR (100 MHz, CDCl<sub>3</sub>) (δ, ppm): 171.2, 154.0, 150.9, 148.0, 140.6, 140.4, 138.2, 136.5, 134.4, 130.5, 130.1, 128.8, 128.0, 127.5, 127.3, 127.2, 127.0, 124.5, 122.6, 121.6, 121.5, 119.7, 116.7, 115.6, 111.1, 37.4, 25.3, 23.7. IR (KBr, ν, cm<sup>-1</sup>): 2310, 1769, 1539, 1194, 1133, 926, 822, 737; HRMS (ESI -TOF) m/z calcd for C<sub>33</sub>H<sub>25</sub>N<sub>2</sub>O<sub>2</sub> [M-H]<sup>-</sup> 481.1916, found 481.1911;

**N-(quinolin-8-yl)-4-(2-(p-tolyl)benzofuran-3-yl)butanamide(3e)**

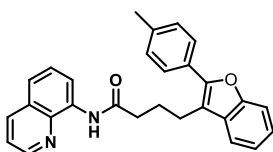

Yellowish oil; 73.9 mg, 88% yield; <sup>1</sup>H NMR (400 MHz, CDCl<sub>3</sub>) (δ, ppm): 9.81 (s, 1H), 8.78–8.82 (m, 2H), 8.21 (d, *J* = 8.0 Hz, 1H), 7.64–7.70 (m, 3H), 7.52–7.60 (m, 2H), 7.46–7.49 (m, 2H), 7.28–7.30 (m, 1H), 7.21–7.24 (m, 1H), 7.18 (d, *J* = 8.0 Hz, 2H), 3.14–3.06 (m, 2H), 2.68–2.71 (m, 2H), 2.34–2.24 (m, 5H). <sup>13</sup>C NMR (100 MHz, CDCl<sub>3</sub>) (δ, ppm): 171.4, 154.0, 151.4, 138.2, 130.6, 129.4, 128.4, 128.2, 126.9, 124.2, 122.5, 121.6, 119.7, 114.7, 111.0, 37.4, 25.3, 23.7, 21.3. IR

(KBr,  $\nu$ ,  $\text{cm}^{-1}$ ): 2344, 1776, 1463, 1250, 1201, 966, 783, 693; HRMS (ESI -TOF)  $m/z$  calcd for  $\text{C}_{28}\text{H}_{23}\text{N}_2\text{O}_2$   $[\text{M}-\text{H}]^-$  419.1760, found 419.1753;

**4-(2-(4-propylphenyl)benzofuran-3-yl)-N-(quinolin-8-yl)butanamide(3f)**

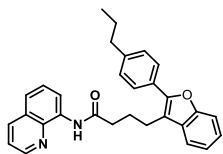

Yellowish oil; 72.6 mg, 81% yield;  $^1\text{H}$  NMR (400 MHz,  $\text{CDCl}_3$ ) ( $\delta$ , ppm):  $\delta$  9.77 (s, 1H), 8.82–8.84 (m, 1H), 8.77–8.78 (m, 1H), 8.10–8.16 (m, 1H), 7.74 (d,  $J = 8.2$  Hz, 2H), 7.70–7.63 (m, 1H), 7.54–7.58 (m, 1H), 7.49–7.52 (m, 2H), 7.42–7.45 (m, 1H), 7.28–7.32 (m, 1H), 7.20–7.25 (m, 3H), 3.18–2.99 (m, 2H), 2.68–2.71 (m, 2H), 2.61–2.51 (m, 2H), 2.40–2.23 (m, 2H), 1.70–1.58 (m, 2H), 0.94–.98 (m, 3H).  $^{13}\text{C}$  NMR (100 MHz,  $\text{CDCl}_3$ ) ( $\delta$ , ppm): 171.3, 154.0, 151.5, 148.2, 143.0, 138.4, 136.5, 134.6, 130.6, 128.9, 128.7, 128.0, 127.5, 126.9, 124.2, 122.5, 121.7, 121.5, 119.7, 116.6, 114.8, 111.1, 37.9, 37.5, 25.3, 24.4, 23.8, 13.9. IR (KBr,  $\nu$ ,  $\text{cm}^{-1}$ ): 2336, 1768, 1566, 1287, 1401, 955, 888, 766; HRMS (ESI -TOF)  $m/z$  calcd for  $\text{C}_{30}\text{H}_{27}\text{N}_2\text{O}_2$   $[\text{M}-\text{H}]^-$  447.2073, found 447.2069;

**4-(2-(4-(tert-butyl)phenyl)benzofuran-3-yl)-N-(quinolin-8-yl)butanamide(3g)**

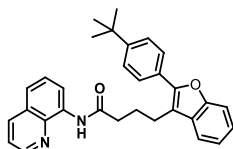

Yellowish oil; 79.5 mg, 86% yield;  $^1\text{H}$  NMR (400 MHz,  $\text{CDCl}_3$ ) ( $\delta$ , ppm): 9.87 (s, 1H), 8.90 (d,  $J = 7.6$  Hz, 1H), 8.83 (d,  $J = 4.0$  Hz, 1H), 8.20 (d,  $J = 8.4$  Hz, 1H), 7.83 (d,  $J = 8.4$  Hz, 2H), 7.73 (d,  $J = 7.6$  Hz, 1H), 7.64–7.54 (m, 3H), 7.51–7.47 (m, 3H), 7.38–7.30 (m, 2H), 3.20–3.14 (m, 2H), 2.79–2.74 (m, 2H), 2.43–2.35 (m, 2H), 1.39 (s, 9H).  $^{13}\text{C}$  NMR (100 MHz,  $\text{CDCl}_3$ ) ( $\delta$ , ppm): 165.3, 165.3, 148.1, 145., 145.44, 145.4, 142.3, 132.5, 130.5, 128.7, 124.7, 122.5, 122.1, 121.6, 120.8, 119.8, 118.3, 116.6, 115.8, 115.6, 113.8, 110.7, 108.9, 105.2, 31.7, 28.8, 25.4, 19.5, 17.9. IR (KBr,  $\nu$ ,  $\text{cm}^{-1}$ ): 2336, 1766, 1586, 1209, 1114, 999, 812, 740; HRMS (ESI -TOF)  $m/z$  calcd for  $\text{C}_{31}\text{H}_{29}\text{N}_2\text{O}_2$   $[\text{M}-\text{H}]^-$  461.2229, found 461.2228;

**4-(2-butylbenzofuran-3-yl)-N-(quinolin-8-yl)butanamide(3h)**

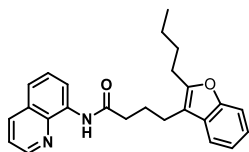

Yellowish oil; 68.7 mg, 89% yield;  $^1\text{H}$  NMR (400 MHz,  $\text{CDCl}_3$ ) ( $\delta$ , ppm): 9.84 (s, 1H), 8.79–8.82 (m, 2H), 8.22–8.16 (m, 1H), 7.50–7.58 (m, 3H), 7.45–7.48 (m, 1H), 7.38–7.40 (m, 1H), 7.16–7.22 (m, 2H), 2.72–2.81 (m, 4H), 2.61–2.65 (m, 2H), 2.15–2.23 (m, 2H), 1.66–1.73 (m, 2H), 1.30–1.40 (m, 2H), 0.89 (t,  $J = 7.4$  Hz, 3H).  $^{13}\text{C}$  NMR (100 MHz,  $\text{CDCl}_3$ ) ( $\delta$ , ppm): 171.4, 155.1, 154.0, 147.9, 136.8, 134.4, 129.6, 128.1, 127.6, 123.0, 122.1, 121.6, 121.5, 119.0, 116.9, 113.3, 110.7, 37.3, 30.6, 26.2, 25.5, 23.0, 22.4, 13.8. IR (KBr,  $\nu$ ,  $\text{cm}^{-1}$ ): 2220, 1742, 1556, 1247, 1156, 943, 823, 767; HRMS (ESI -TOF)  $m/z$  calcd for  $\text{C}_{25}\text{H}_{25}\text{N}_2\text{O}_2$   $[\text{M}-\text{H}]^-$  385.1916, found 385.1909;

**4-(2-(tert-butyl)benzofuran-3-yl)-N-(quinolin-8-yl)butanamide(3i)**

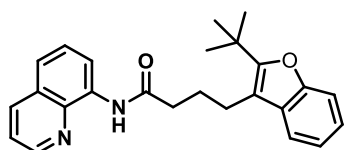



Yellow oil; 69.5 mg, 90% yield;  $^1\text{H NMR}$  (400 MHz,  $\text{CDCl}_3$ ) ( $\delta$ , ppm): 9.83 (s, 1H), 8.85–8.78 (m, 2H), 8.19–8.14 (m, 1H), 7.58–7.49 (m, 3H), 7.48–7.43 (m, 1H), 7.39 (d,  $J = 7.6$  Hz, 1H), 7.24–7.15 (m, 2H), 2.99–2.91 (m, 2H), 2.73–2.66 (m, 2H), 2.24–2.13 (m, 2H), 1.47 (s, 9H).  $^{13}\text{C NMR}$  (100 MHz,  $\text{CDCl}_3$ ) ( $\delta$ , ppm): 171.3, 160.2, 153.0, 148.2, 138.4, 136.5, 134.6, 130.9, 128.0, 127.6, 123.2, 122.0, 121.7, 121.5, 119.1, 116.6, 112.1, 110.6, 37.9, 34.6, 29.9, 26.6, 23.7. IR (KBr,  $\text{v, cm}^{-1}$ ): 2451, 1745, 1543, 1223, 1145, 968, 821, 771; HRMS (ESI -TOF)  $m/z$  calcd for  $\text{C}_{25}\text{H}_{25}\text{N}_2\text{O}_2$   $[\text{M-H}]^-$  385.1916, found 385.1908;

**4-(2-cyclopropylbenzofuran-3-yl)-N-(quinolin-8-yl)butanamide(3j)**

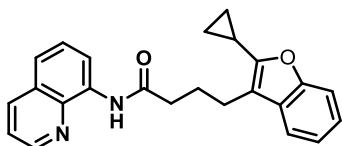

Yellow oil; 50.3 mg, 68% yield;  $^1\text{H NMR}$  (400 MHz,  $\text{CDCl}_3$ ) ( $\delta$ , ppm): 9.79 (s, 1H), 8.83–8.76 (m, 2H), 8.19–8.14 (m, 1H), 7.56–7.43 (m, 4H), 7.35–7.28 (m, 1H), 7.22–7.04 (m, 2H), 3.04–2.81 (m, 2H), 2.71–2.53 (m, 2H), 2.32–2.12 (m, 2H), 2.09–1.99 (m, 1H), 1.13–0.99 (m, 2H), 0.97–0.82 (m, 2H).  $^{13}\text{C NMR}$  (100 MHz,  $\text{CDCl}_3$ ) ( $\delta$ , ppm): 171.4, 154.8, 153.3, 148.1, 138.3, 136.4, 134.5, 130.0, 128.0, 127.5, 122.8, 122.1, 121.6, 121.4, 118.5, 116.5, 113.1, 110.5, 37.1, 25.3, 22.6, 7.8, 6.9, 6.8(9). IR (KBr,  $\text{v, cm}^{-1}$ ): 2332, 1772, 1558, 1247, 1128, 933, 836, 725; HRMS (ESI -TOF)  $m/z$  calcd for  $\text{C}_{24}\text{H}_{21}\text{N}_2\text{O}_2$   $[\text{M-H}]^-$  369.1603, found 369.1598;

**4-(2-phenethylbenzofuran-3-yl)-N-(quinolin-8-yl)butanamide(3k)**

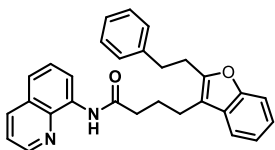

Yellowish oil; 67.7 mg, 78% yield;  $^1\text{H NMR}$  (400 MHz,  $\text{CDCl}_3$ ) ( $\delta$ , ppm): 9.83 (s, 1H), 8.85–8.87 (m, 2H), 8.24 (d,  $J = 8.4$  Hz, 1H), 7.60 (m, 3H), 7.53–7.47 (m, 2H), 7.31–7.22 (m, 4H), 7.19 (m, 3H), 3.10 (s, 4H), 2.69 (m, 2H), 2.50 (m, 2H), 2.09–2.01 (m, 2H).  $^{13}\text{C NMR}$  (100 MHz,  $\text{CDCl}_3$ ) ( $\delta$ , ppm): 171.4, 154.1, 153.6, 147.9, 141.1, 134.4, 129.5, 128.5, 128.4, 128.1, 127.6, 126.2, 123.3, 122.2, 121.6, 121.5, 119.3, 114.2, 110.7, 37.1, 34.6, 28.7, 25.2, 22.8. IR (KBr,  $\text{v, cm}^{-1}$ ): 2344, 1782, 1558, 1265, 1172, 942, 882, 714; HRMS (ESI -TOF)  $m/z$  calcd for  $\text{C}_{29}\text{H}_{25}\text{N}_2\text{O}_2$   $[\text{M-H}]^-$  433.1916, found 433.1924;

**N-(quinolin-8-yl)-4-(2-(thiophen-2-yl)benzofuran-3-yl)butanamide(3l)**

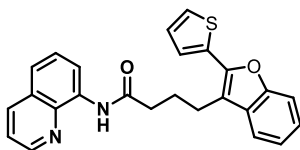

Yellow oil; 42.0 mg, 51% yield;  $^1\text{H NMR}$  (400 MHz,  $\text{CDCl}_3$ ) ( $\delta$ , ppm): 9.80 (s, 1H), 8.77–8.82 (m, 2H), 8.18 (d,  $J = 8.0$  Hz, 1H), 7.62 (d,  $J = 7.6$  Hz, 1H), 7.59–7.49 (m, 3H), 7.44–7.48 (m, 2H), 7.29 (d,  $J = 5.6$  Hz, 1H), 7.21–7.30 (m, 1H), 7.06–7.07 (m, 1H), 3.09–3.13 (m, 2H), 2.69–2.73 (m, 2H), 2.27–2.33 (m, 2H).  $^{13}\text{C NMR}$  (100 MHz,  $\text{CDCl}_3$ ) ( $\delta$ , ppm): 171.2, 153.8, 148.0, 147.0, 134.4, 133.0, 130.2, 128.0, 127.6, 127.5, 125.6, 125.2, 124.5, 122.7, 121.6, 121.5, 119.6, 114.8, 111.0, 37.4, 24.9, 23.6. IR (KBr,  $\text{v, cm}^{-1}$ ): 2347, 1768, 1675, 1547 1447, 1352, 1175, 975, 833, 745; HRMS (ESI -TOF)  $m/z$  calcd for  $\text{C}_{25}\text{H}_{19}\text{N}_2\text{O}_2\text{S}$   $[\text{M-H}]^-$  411.1167, found 411.1157;

**N-(quinolin-8-yl)-4-(2-(trimethylsilyl)benzofuran-3-yl)butanamide(3m)**

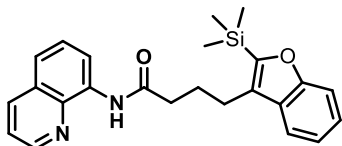

Yellowish oil; 69.9 mg, 87% yield; mp: 301-302 °C; <sup>1</sup>H NMR (400 MHz, CDCl<sub>3</sub>) (δ, ppm): 9.82 (s, 1H), 8.80 (m, 2H), 8.17 (d, *J* = 8.0 Hz, 1H), 7.64 (d, *J* = 8.4 Hz, 1H), 7.56–7.64 (m, 2H), 7.48–7.52 (m, 2H), 7.27–7.31 (m, 1H), 7.17–7.20 (m, 1H), 2.98–2.87 (m, 2H), 2.67–2.71 (m, 2H), 2.26–2.15 (m, 2H), 0.39 (s, 9H). <sup>13</sup>C NMR (100 MHz, CDCl<sub>3</sub>) (δ, ppm): 171.2, 154.7, 149.7, 148.1, 134.6, 132.4, 130.5, 130.1, 130.1, 129.2, 128.0, 127.5, 126.7, 126.7, 126.7, 124.6, 122.6, 121.6, 121.4, 120.2, 117.6, 111.4, 111.40, 37.3, 25.0, 23.6. IR (KBr, ν, cm<sup>-1</sup>): 2323, 1752, 1558, 1264 1201, 957, 833, 776; HRMS (ESI -TOF) *m/z* calcd for C<sub>24</sub>H<sub>25</sub>N<sub>2</sub>O<sub>2</sub>Si [M-H]<sup>-</sup> 401.1685, found 401.1677;

#### 4-(benzofuran-3-yl)-N-(quinolin-8-yl)butanamide(3n)

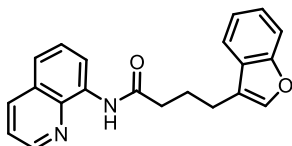

Yellowish oil; 46.9 mg, 71% yield; <sup>1</sup>H NMR (400 MHz, CDCl<sub>3</sub>) (δ, ppm): 9.81 (s, 1H), 8.83–8.73 (m, 2H), 8.18–8.10 (m, 1H), 7.64–7.57 (m, 1H), 7.55–7.44 (m, 5H), 7.26–7.12 (m, 2H), 2.98–2.81 (m, 2H), 2.70–2.62 (m, 2H), 2.32–2.21 (m, 2H). <sup>13</sup>C NMR (100 MHz, CDCl<sub>3</sub>) (δ, ppm): 171.3, 158.3, 155.5, 148.2, 141.5, 138.4, 136.5, 134.5, 133.7, 130.2, 128.5, 128.1, 128.0, 127.5, 124.2, 123.3, 122.5, 122.3, 121.7, 121.5, 120.3, 119.7, 119.6, 116.6, 111.5, 110.9, 102.7, 37.3, 37.0, 27.8, 24.8, 23.6, 23.0. IR (KBr, ν, cm<sup>-1</sup>): 2341, 1762, 1551, 1082, 1156, 976, 835, 765; HRMS (ESI -TOF) *m/z* calcd for C<sub>21</sub>H<sub>17</sub>N<sub>2</sub>O<sub>2</sub> [M-H]<sup>-</sup> 329.1290, found 329.1294;

#### 4-(2-phenylbenzofuran-3-yl)-N-(quinolin-8-yl)pentanamide(3o)

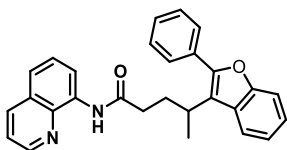

Yellowish oil; 67.2 mg, 80% yield; <sup>1</sup>H NMR (400 MHz, CDCl<sub>3</sub>) (δ, ppm): 9.56 (s, 1H), 8.73 (d, *J* = 3.6 Hz, 1H), 8.65 (d, *J* = 6.4 Hz, 1H), 8.14–8.11 (m, 1H), 7.80 (d, *J* = 7.6 Hz, 1H), 7.63 (d, *J* = 7.2 Hz, 2H), 7.50 (m, 3H), 7.42 (m, 1H), 7.30 (m, 1H), 7.25–7.21 (m, 2H), 7.18 (m, 1H), 3.49 (m, 1H), 2.55–2.32 (m, 4H), 1.59 (d, *J* = 6.8 Hz, 3H). <sup>13</sup>C NMR (100 MHz, CDCl<sub>3</sub>) (δ, ppm): 165.5, 165.5, 148.8, 148.7, 145.6, 145.6, 142.2, 142.1, 130.5, 128.5, 125.1, 125.1, 124.4, 122.6, 122.6, 122.4, 122.0, 121.6, 121.6, 118.4, 118.3, 116.5, 116.5, 115.7, 115.7, 115.5, 115.5, 115.4, 113.5, 113.4, 110.7, 105.6, 105.6, 30.5, 25.7, 24.6, 15.1. IR (KBr, ν, cm<sup>-1</sup>): 2342, 1757, 1545, 1212, 1156, 974, 855, 775; HRMS (ESI -TOF) *m/z* calcd for C<sub>28</sub>H<sub>23</sub>N<sub>2</sub>O<sub>2</sub> [M-H]<sup>-</sup> 419.1760, found 419.1763;

#### 4-(2-phenylnaphtho[2,1-b]furan-1-yl)-N-(quinolin-8-yl)butanamide(3p)

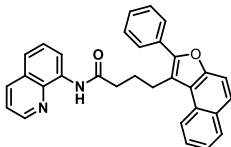

Yellowish solid; 75.7 mg, 83% yield; mp: 193-194 °C; <sup>1</sup>H NMR (400 MHz, CDCl<sub>3</sub>) (δ, ppm): 9.80 (s, 1H), 8.92–8.65 (m, 2H), 8.46 (d, *J* = 8.0 Hz, 1H), 8.21–8.11 (m, 1H), 7.96 (d, *J* = 8.4 Hz, 1H), 7.81 (d, *J* = 7.6 Hz, 2H), 7.76–7.64 (m, 2H), 7.63–7.53 (m, 2H), 7.53–7.43 (m, 3H), 7.4–7.32 (m, 2H), 7.28 (d, *J* = 7.6 Hz, 1H), 3.54–3.35 (m, 2H), 2.87–2.70 (m, 2H), 2.58–2.28 (m, 2H). <sup>13</sup>C NMR (100 MHz, CDCl<sub>3</sub>) (δ, ppm): 171.1, 152.1, 151.3, 148.1, 138.3, 136.4, 134.5, 131.2, 130.9, 129.3, 128.7, 128.0, 127.5, 127.4, 126.6, 125.9, 124.1, 123.2, 123.0, 121.6, 121.5, 117.7, 116.5, 112.4, 37.6, 25.7, 25.2. IR (KBr, ν, cm<sup>-1</sup>): 2312, 1754, 1528, 1247, 1108, 955, 887, 757; HRMS (ESI -TOF) *m/z* calcd for C<sub>31</sub>H<sub>23</sub>N<sub>2</sub>O<sub>2</sub> [M-H]<sup>-</sup> 455.1760, found 455.1751;

#### 4-(2-(2-chlorophenyl)naphtho[2,1-b]furan-1-yl)-N-(quinolin-8-yl)butanamide(3q)

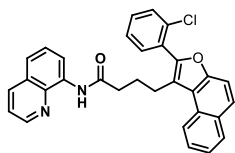

Yellowish solid; 67.6 mg, 69% yield; mp: 163-164 °C; <sup>1</sup>H NMR (400 MHz, CDCl<sub>3</sub>) (δ, ppm): 9.78 (s, 1H), 8.94–8.75 (m, 2H), 8.45 (d, *J* = 8.4 Hz, 1H), 8.20–8.13 (m, 1H), 7.96 (d, *J* = 8.0 Hz, 1H), 7.87–7.80 (m, 1H), 7.78–7.63 (m, 3H), 7.63–7.42 (m, 5H), 7.29 (d, *J* = 8.0 Hz, 1H), 7.24–7.11 (m, 1H), 3.53–3.35 (m, 2H), 2.85–2.69 (m, 2H), 2.54–2.31 (m, 2H). <sup>13</sup>C NMR (100 MHz, CDCl<sub>3</sub>) (δ, ppm): 170.9, 152.3, 149.6, 148.2, 138.3, 136.4, 134.8, 134.5, 132.9, 130.9, 123.0, 129.4, 128.6, 127.9, 127.5, 127.2, 126.8, 126.4, 125.3, 124.3, 123.2, 121.6, 121.5, 118.8, 116.6, 112.4, 37.2, 25.4, 25.1. IR (KBr, v, cm<sup>-1</sup>): 2344, 1777, 1575, 1251, 1175, 943, 8368, 725; HRMS (ESI -TOF) *m/z* calcd for C<sub>31</sub>H<sub>22</sub>ClN<sub>2</sub>O<sub>2</sub> [M-H]<sup>-</sup> 489.1370, found 489.1376;

**4-(2-(4-fluorophenyl)naphtho[2,1-b]furan-1-yl)-N-(quinolin-8-yl)butanamide(3r)**

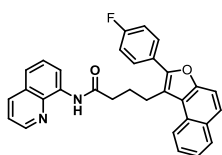

White solid; 79.6mg, 84% yield; mp: 187-188 °C; <sup>1</sup>H NMR (400 MHz, CDCl<sub>3</sub>) (δ, ppm): 10.14 (s, 1H), 8.94– 881 (m, 2H), 8.49–8.34 (m, 2H), 7.96 (d, *J* = 8.0 Hz, 1H), 7.79–7.82 (m, 2H), 7.73 (d, *J* = 8.8 Hz, 1H), 7.60–7.66 (m, 5H), 7.46–7.50 (m, 1H), 7.07–7.11 (m, 2H), 3.42–3.34 (m, 2H), 2.89 (m, 2H), 2.43 (m, 2H). <sup>13</sup>C NMR (100 MHz, CDCl<sub>3</sub>) (δ, ppm): 150.4(<sup>4</sup>*J*<sub>CF</sub> = 240.0 Hz), 130.9, 129.3(<sup>2</sup>*J*<sub>CF</sub> = 8.3Hz), 128.6, 124.2, 122.9(<sup>3</sup>*J*<sub>CF</sub> = 22.1 Hz), 122.0, 121.4, 117.5, 115.9, 115.7, 112.3, 37.3, 25.5, 25.1. IR (KBr, v, cm<sup>-1</sup>): 2296, 1786, 1575, 1245, 1127, 975, 836, 724; HRMS (ESI-TOF) *m/z* calcd for C<sub>31</sub>H<sub>22</sub>FN<sub>2</sub>O<sub>2</sub> [M-H]<sup>-</sup> 473.1665, found 473.1671;

**4-(2-(4-bromophenyl)naphtho[2,1-b]furan-1-yl)-N-(quinolin-8-yl)butanamide(3s)**

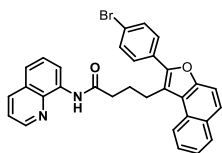

Yellowish solid; 87.6 mg, 82% yield; mp: 161-162 °C; <sup>1</sup>H NMR (400 MHz, CDCl<sub>3</sub>) (δ, ppm): 9.78 (s, 1H), 8.88–8.72 (m, 2H), 8.43 (d, *J* = 8.4 Hz, 1H), 8.23–8.15 (m, 1H), 7.96 (d, *J* = 8.0 Hz, 1H), 7.82–7.63 (m, 4H), 7.62–7.51 (m, 3H), 7.47 (m, 4H), 3.49–3.35 (m, 2H), 2.83–2.66 (m, 2H), 2.51–2.32 (m, 2H). <sup>13</sup>C NMR (100 MHz, CDCl<sub>3</sub>) (δ, ppm): 170.9, 152.3, 149.6, 148.2, 138.3, 136.4, 134.8, 134.5, 132.9, 130.9, 130.0, 129.4, 128.6, 127.9, 127.5, 127.2, 126.8, 126.4, 125.3, 124.3, 123.2, 121.6, 121.5, 118.8, 116.6, 112.4, 37.2, 25.4, 25.1. IR (KBr, v, cm<sup>-1</sup>): 2346, 1747, 1568, 1225, 1148, 985, 812, 774; HRMS (ESI -TOF) *m/z* calcd for C<sub>31</sub>H<sub>22</sub>BrN<sub>2</sub>O<sub>2</sub> [M-H]<sup>-</sup> 533.0865, found 533.0869;

**N-(quinolin-8-yl)-4-(2-(*m*-tolyl)naphtho[2,1-b]furan-1-yl)butanamide(3t)**

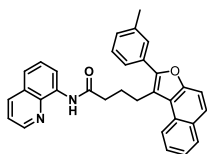

Yellowish solid; 80.8 mg, 86% yield; mp: 181-182 °C; <sup>1</sup>H NMR (400 MHz, CDCl<sub>3</sub>) (δ, ppm): 9.79 (s, 1H), 8.85 (d, *J* = 7.6 Hz, 1H), 8.78–8.73 (m, 1H), 8.47 (d, *J* = 8.4 Hz, 1H), 8.17–8.10 (m, 1H), 7.97 (d, *J* = 8.0 Hz, 1H), 7.77–7.65 (m, 3H), 7.65–7.53 (m, 3H), 7.53–7.46 (m, 2H), 7.45–7.40 (m, 1H), 7.33–7.27 (m, 1H), 7.08 (d, *J* = 7.6 Hz, 1H), 3.50–3.38 (m, 2H), 2.84–2.71 (m, 2H), 2.50–2.42 (m, 2H), 2.40 (s, 3H). <sup>13</sup>C NMR (100 MHz, CDCl<sub>3</sub>) (δ, ppm): 170.9, 152.3, 149.6, 148.2, 138.3, 136.4, 134.8, 134.5, 132.9, 130.9, 130.0, 129.4, 128.6, 127.9, 127.5, 127.2, 126.8, 126.4, 125.3, 124.3, 123.2, 121.6,

121.5, 118.8, 116.6, 112.4, 37.2, 25.4, 25.1. IR (KBr,  $\nu$ ,  $\text{cm}^{-1}$ ): 2333, 1777, 1664, 1278, 1112, 9586, 893, 735; HRMS (ESI -TOF)  $m/z$  calcd for  $\text{C}_{32}\text{H}_{25}\text{N}_2\text{O}_2$   $[\text{M}-\text{H}]^-$  469.1916, found 469.1909;

***N*-(quinolin-8-yl)-4-(2-(*p*-tolyl)naphtho[2,1-*b*]furan-1-yl)butanamide(3u)**

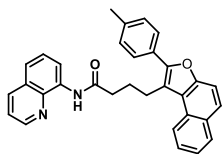

Yellowish solid; 80.8 mg, 86% yield; mp: 198-199 °C;  $^1\text{H}$  NMR (400 MHz,  $\text{CDCl}_3$ ) ( $\delta$ , ppm): 9.75 (s, 1H), 8.84–8.74 (m, 2H), 8.45 (d,  $J = 8.0$  Hz, 1H), 8.17 (d,  $J = 8.4$  Hz, 1H), 7.95 (d,  $J = 8.0$  Hz, 1H), 7.75–7.64 (m, 4H), 7.60–7.49 (m, 3H), 7.49–7.40 (m, 2H), 7.16 (d,  $J = 8.0$  Hz, 2H), 3.47–3.36 (m, 2H), 2.81–2.67 (m, 2H), 2.48–2.40 (m, 2H), 2.26 (s, 3H).

$^{13}\text{C}$  NMR (100 MHz,  $\text{CDCl}_3$ ) ( $\delta$ , ppm): 170.9, 152.3, 149.6, 148.2, 138.3, 136.4, 134.8, 134.5, 132.9, 130.9, 130.0, 129.4, 128.6, 127.9, 127.5, 127.2, 126.8, 126.4, 125.3, 124.3, 123.2, 121.6, 121.5, 118.8, 116.6, 112.4, 37.2, 25.4, 25.1. IR (KBr,  $\nu$ ,  $\text{cm}^{-1}$ ): 2336, 1775, 1585, 1214, 1172, 996, 842, 753; HRMS (ESI -TOF)  $m/z$  calcd for  $\text{C}_{32}\text{H}_{25}\text{N}_2\text{O}_2$   $[\text{M}-\text{H}]^-$  469.1916, found 469.1910;

***4*-(2-(4-ethylphenyl)naphtho[2,1-*b*]furan-1-yl)-*N*-(quinolin-8-yl)butanamide(3v)**

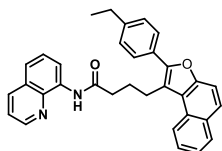

White solid; 82.3 mg, 85% yield; mp: 190-191 °C;  $^1\text{H}$  NMR (400 MHz,  $\text{CDCl}_3$ ) ( $\delta$ , ppm): 9.88 (s, 1H), 8.79–8.84 (m, 2H), 8.46 (d,  $J = 8.4$  Hz, 1H), 8.22 (d,  $J = 8.0$  Hz, 1H), 7.95 (d,  $J = 8.4$  Hz, 1H), 3.49–3.31 (m, 2H), 2.80–2.83 (m, 2H), 2.57–2.63 (m, 2H), 2.50–2.38 (m, 2H), 1.22 (t,  $J = 7.6$  Hz, 3H).  $^{13}\text{C}$  NMR (100 MHz,  $\text{CDCl}_3$ ) ( $\delta$ , ppm): 171.3, 152.0, 151.6, 144.3, 130.9, 129.3, 128.6, 128.2, 128.1, 127.8, 127.4, 126.5, 125.5, 124.1, 123.2, 123.0, 121.6, 121.5, 117.1, 112.4, 37.5, 28.6, 25.7, 25.2, 15.4. IR (KBr,  $\nu$ ,  $\text{cm}^{-1}$ ): 2323, 1786, 1534, 1207, 1186, 953, 839, 735; HRMS (ESI -TOF)  $m/z$  calcd for  $\text{C}_{33}\text{H}_{27}\text{N}_2\text{O}_2$   $[\text{M}-\text{H}]^-$  483.2073, found 483.2076;

***4*-(2-(4-propylphenyl)naphtho[2,1-*b*]furan-1-yl)-*N*-(quinolin-8-yl)butanamide(3w)**

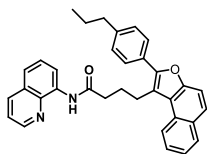

White solid; 84.7 mg, 85% yield; mp: 181-182 °C;  $^1\text{H}$  NMR (400 MHz,  $\text{CDCl}_3$ ) ( $\delta$ , ppm): 10.20 (s, 1H), 9.02–8.83 (m, 2H), 8.53 (d,  $J = 8.0$  Hz, 1H), 8.42 (d,  $J = 6.4$  Hz, 1H), 8.00 (d,  $J = 8.0$  Hz, 1H), 7.82–7.69 (m, 5H), 7.65 (d,  $J = 7.6$  Hz, 3H), 7.50–7.53 (m, 1H), 7.28 (d,  $J = 7.6$  Hz, 2H), 3.61–3.40 (m, 2H), 2.96 (s, 2H), 2.59–2.62 (m, 2H), 2.49 (s, 2H), 1.64–1.73 (m, 2H), 1.00 (t,  $J = 7.2$  Hz, 3H).  $^{13}\text{C}$  NMR (100 MHz,  $\text{CDCl}_3$ ) ( $\delta$ , ppm): 171.8, 151.9, 151.5, 142.8, 130.8, 129.2, 128.9, 128.6(2), 128.5(7), 127.3, 126.6, 125.5, 124.0, 123.3, 123.1, 122.0, 121.3, 117.2, 112.4, 37.8, 37.4, 25.7, 25.3, 24.4, 13.9. IR (KBr,  $\nu$ ,  $\text{cm}^{-1}$ ): 2351, 1744, 1553, 1207, 1143, 986, 843, 788; HRMS (ESI -TOF)  $m/z$  calcd for  $\text{C}_{34}\text{H}_{29}\text{N}_2\text{O}_2$   $[\text{M}-\text{Na}]^-$  497.2229, found 497.2236;

***4*-(2-(4-(*tert*-butyl)phenyl)naphtho[2,1-*b*]furan-1-yl)-*N*-(quinolin-8-yl)butanamide(3x)**

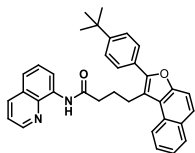

Yellowish solid; 90.1 mg, 88% yield; mp: 189-190 °C; <sup>1</sup>H NMR (400 MHz, CDCl<sub>3</sub>) (δ, ppm): 9.86 (s, 1H), 8.89 – 8.75 (m, 2H), 8.46 (d, *J* = 8.4 Hz, 1H), 8.20–8.13 (m, 1H), 7.96 (d, *J* = 8.0 Hz, 1H), 7.78–7.65 (m, 4H), 7.61–7.54 (m, 2H), 7.53–7.40 (m, 5H), 3.46–3.36 (m, 2H), 2.86–2.78 (m, 2H), 2.54–2.41 (m, 2H), 1.31 (s, 9H). <sup>13</sup>C NMR (100 MHz, CDCl<sub>3</sub>) (δ, ppm): 170.9, 152.3, 149.6, 148.2, 138.3, 136.4, 134.8, 134.5, 132.9, 130.9, 130.0, 129.4, 128.6, 127.9, 127.5, 127.2, 126.8, 126.4, 125.3, 124.3, 123.2, 121.6, 121.5, 118.8, 116.6, 112.4, 37.2, 25.4, 25.1. IR (KBr, v, cm<sup>-1</sup>): 2321, 1771, 1575, 1245, 1423, 985, 845, 793; HRMS (ESI -TOF) *m/z* calcd for C<sub>35</sub>H<sub>31</sub>N<sub>2</sub>O<sub>2</sub> [M-H]<sup>-</sup> 5111.2386, found 511.2391;

***N*-(quinolin-8-yl)-4-(2-(thiophen-2-yl)naphtho[2,1-*b*]furan-1-yl)butanamide(3y)**

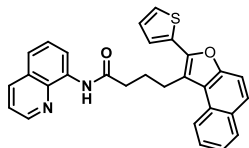

White solid; 62.8 mg, 68% yield; mp: 197-198 °C; <sup>1</sup>H NMR (400 MHz, CDCl<sub>3</sub>) (δ, ppm): 9.88 (s, 1H), 8.85 (d, *J* = 7.2 Hz, 1H), 8.77 (d, *J* = 8.0 Hz, 1H), 8.45 (d, *J* = 8.4 Hz, 1H), 8.19 (d, *J* = 8.0 Hz, 1H), 7.94 (d, *J* = 8.0 Hz, 1H), 7.72 (d, *J* = 8.8 Hz, 1H), 7.64 (d, *J* = 8.8 Hz, 1H), 7.51–7.60 (m, 4H), 7.46 (m, 2H), 7.28 (d, *J* = 4.8 Hz, 1H), 7.15–7.01 (m, 1H), 3.55–3.39 (m, 2H), 2.83–2.86 (m, 2H), 2.49–2.35 (m, 2H). <sup>13</sup>C NMR (100 MHz, CDCl<sub>3</sub>) (δ, ppm): 171.2, 151.9, 147.8, 146.8, 136.9, 134.4, 132.9, 130.9, 129.3, 128.5, 127.7, 126.64, 126.0, 125.4, 125.2, 124.3, 123.1, 122.9, 121.6, 117.4, 37.5, 25.3, 25.2. IR (KBr, v, cm<sup>-1</sup>): 2331, 1772, 1554, 1227, 1201, 952, 885, 763; HRMS (ESI -TOF) *m/z* calcd for C<sub>29</sub>H<sub>21</sub>N<sub>2</sub>O<sub>4</sub>S [M-H]<sup>-</sup> 461.1324, found 461.1318;

***4*-(2-phenylnaphtho[2,1-*b*]furan-1-yl)-*N*-(quinolin-8-yl)pentanamide(3z)**

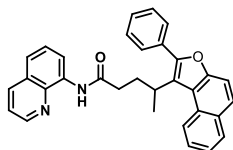

Yellowish solid; 65.8 mg, 70% yield; mp: 196-197 °C; <sup>1</sup>H NMR (400 MHz, CDCl<sub>3</sub>) (δ, ppm): 9.49 (s, 1H), 8.71–8.57 (m, 2H), 8.53 (d, *J* = 8.0 Hz, 1H), 8.13–8.09 (m, 1H), 7.95 (d, *J* = 8.0 Hz, 1H), 7.74 (d, *J* = 8.8 Hz, 1H), 7.70–7.58 (m, 4H), 7.57–7.42 (m, 4H), 7.41–7.37 (m, 1H), 7.32 (s, 2H), 3.79 (s, 1H), 2.69–2.28 (m, 4H), 1.75 (d, *J* = 4.4 Hz, 3H). <sup>13</sup>C NMR (100 MHz, CDCl<sub>3</sub>) (δ, ppm): 170.9, 152.3, 149.6, 148.2, 138.3, 136.4, 134.8, 134.5, 132.9, 130.9, 130.0, 129.4, 128.6, 127.9, 127.5, 127.2, 126.8, 126.4, 125.3, 124.3, 123.2, 121.6, 121.5, 118.8, 116.6, 112.4, 37.2, 25.4, 25.1. IR (KBr, v, cm<sup>-1</sup>): 2421, 1582, 1518, 1258, 1184, 956, 863, 772; HRMS (ESI -TOF) *m/z* calcd for C<sub>32</sub>H<sub>25</sub>N<sub>2</sub>O<sub>2</sub> [M-H]<sup>-</sup> 469.1916, found 469.1923;

***4*-(2-phenylnaphtho[2,1-*b*]furan-1-yl)-*N*-(quinolin-8-yl)heptanamide(3aa)**

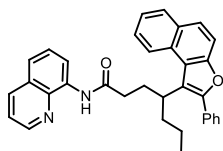

Yellowish oil; 80.7 mg, 81% yield; <sup>1</sup>H NMR (400 MHz, CDCl<sub>3</sub>) (δ, ppm): 9.56 (s, 1H), 8.77–8.57 (m, 3H), 8.18 (d, *J* = 7.2 Hz, 2H), 7.83–7.64 (m, 6H), 7.57–7.48 (m, 5H), 7.25 (d, *J* = 6.4 Hz, 1H), 3.72–3.40 (m, 1H), 2.76–2.47 (m, 4H), 2.33–2.08 (m, 2H), 1.55–1.40 (m, 2H), 0.95–0.91 (m, 3H). <sup>13</sup>C NMR (100 MHz, CDCl<sub>3</sub>) (δ, ppm): 171.2, 153.0, 147.9, 136.3, 134.3, 133.6, 130.2, 128.8, 128.5, 128.3, 127.3, 126.1, 123.9, 121.4, 121.3, 116.5, 112.7, 37.1, 36.6, 35.9, 29.7, 21.9, 14.3. IR (KBr, v, cm<sup>-1</sup>): 2436, 1577, 1501, 1256, 1144, 961, 823, 799; HRMS (ESI -TOF) *m/z* calcd for C<sub>34</sub>H<sub>29</sub>N<sub>2</sub>O<sub>2</sub> [M-H]<sup>-</sup> 497.2229, found 497.2221;

***2*-methyl-4-(2-phenylnaphtho[2,1-*b*]furan-1-yl)-*N*-(quinolin-8-yl)butanamide(3bb)**

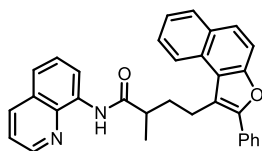

Yellowish oil; 80.8 mg, 86% yield;  $^1\text{H}$  NMR (400 MHz,  $\text{CDCl}_3$ ) ( $\delta$ , ppm): 9.96 (s, 1H), 8.94 (d,  $J = 7.6$  Hz, 1H), 8.81–8.76 (m, 1H), 8.46 (d,  $J = 8.4$  Hz, 1H), 8.15 (d,  $J = 8.4$  Hz, 1H), 7.96 (d,  $J = 8.0$  Hz, 1H), 7.81 (d,  $J = 7.6$  Hz, 2H), 7.74–7.66 (m, 2H), 7.62–7.56 (m, 2H), 7.55–7.45 (m, 3H), 7.38–7.33 (m, 2H), 7.25–7.22 (m, 1H), 3.46–3.33 (m, 2H), 2.98–2.86 (m, 1H), 2.60–2.47 (m, 1H), 2.26–2.15 (m, 1H), 1.49 (d,  $J = 6.8$  Hz, 3H).  $^{13}\text{C}$  NMR (100 MHz,  $\text{CDCl}_3$ ) ( $\delta$ , ppm): 174.7, 152.1, 151.1, 148.2, 138.5, 136.5, 134.5, 133.7, 131.1, 130.9, 130.2, 129.3, 128.7, 128.6, 128.0, 127.9, 127.5, 127.3, 126.5, 125.8, 124.1, 123.2, 123.0, 121.6, 121.6, 117.8, 116.7, 112.4, 43.0, 34.5, 23.8, 18.4. IR (KBr,  $\text{v}$ ,  $\text{cm}^{-1}$ ): 2466, 1564, 1506, 1263, 1180, 973, 866, 729; HRMS (ESI -TOF)  $m/z$  calcd for  $\text{C}_{32}\text{H}_{25}\text{N}_2\text{O}_2$   $[\text{M}-\text{H}]^-$  469.1916, found 469.1919.

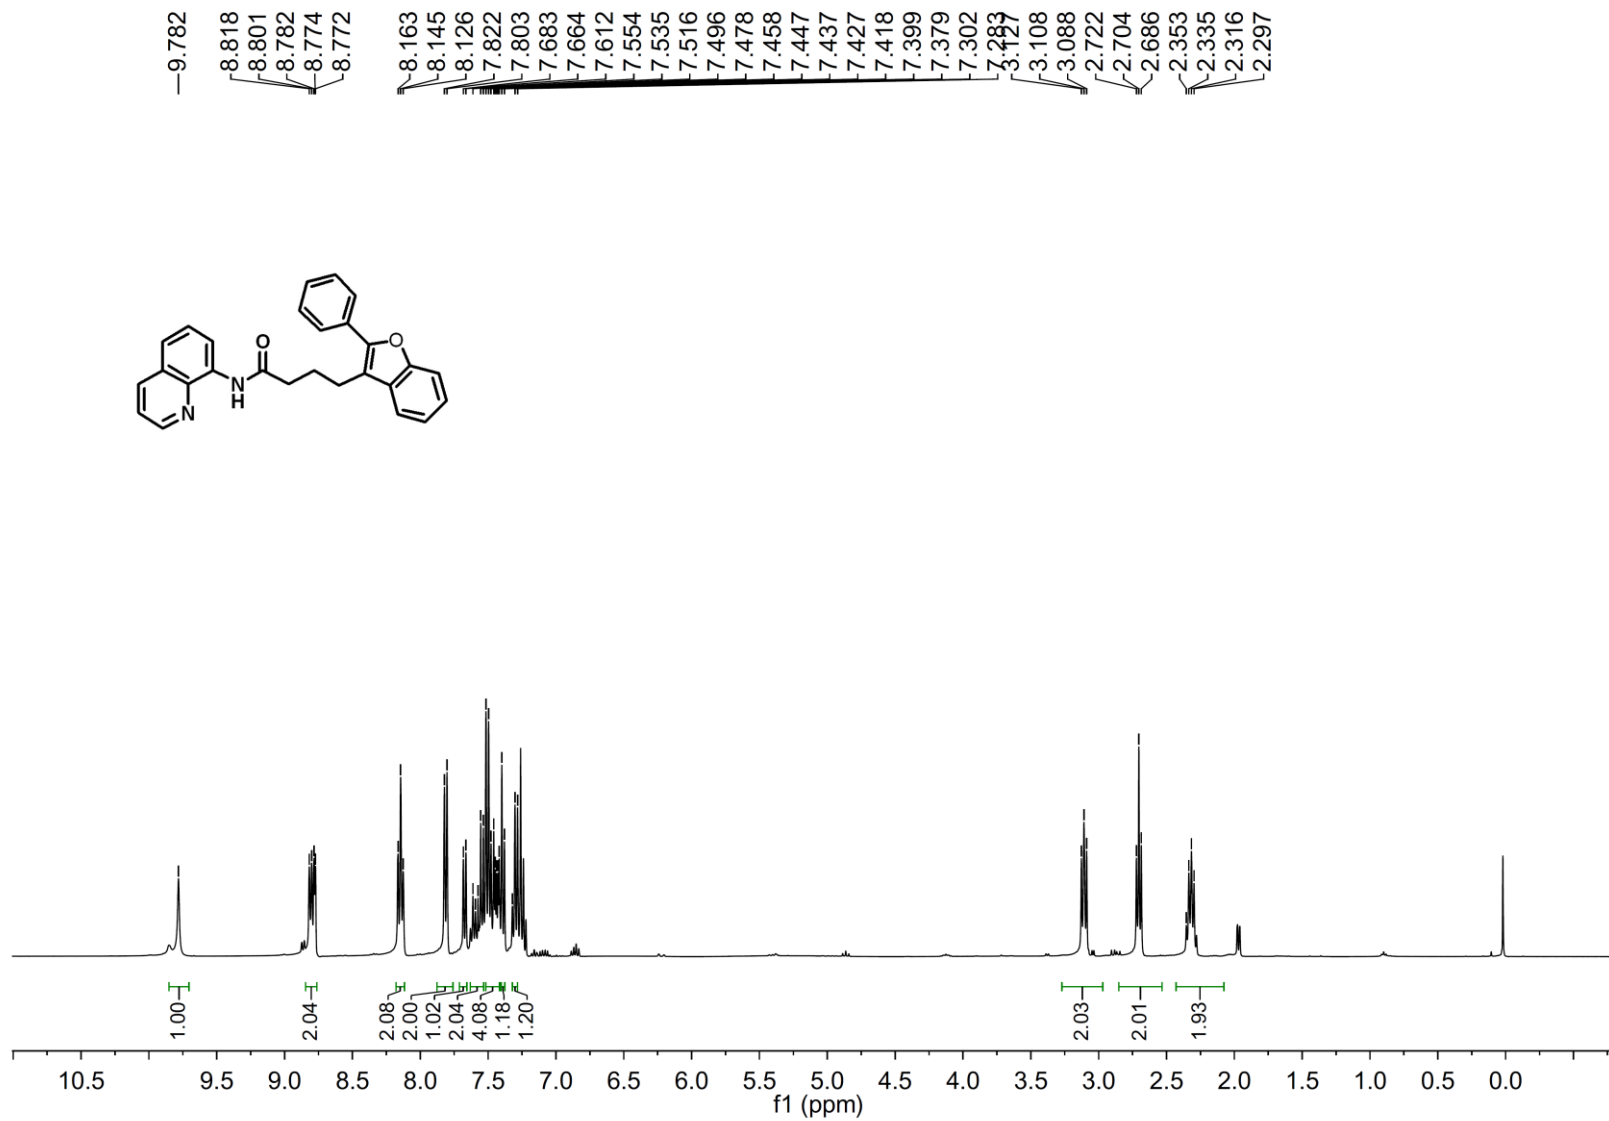

<sup>1</sup>H NMR Spectrum of Compound 3a

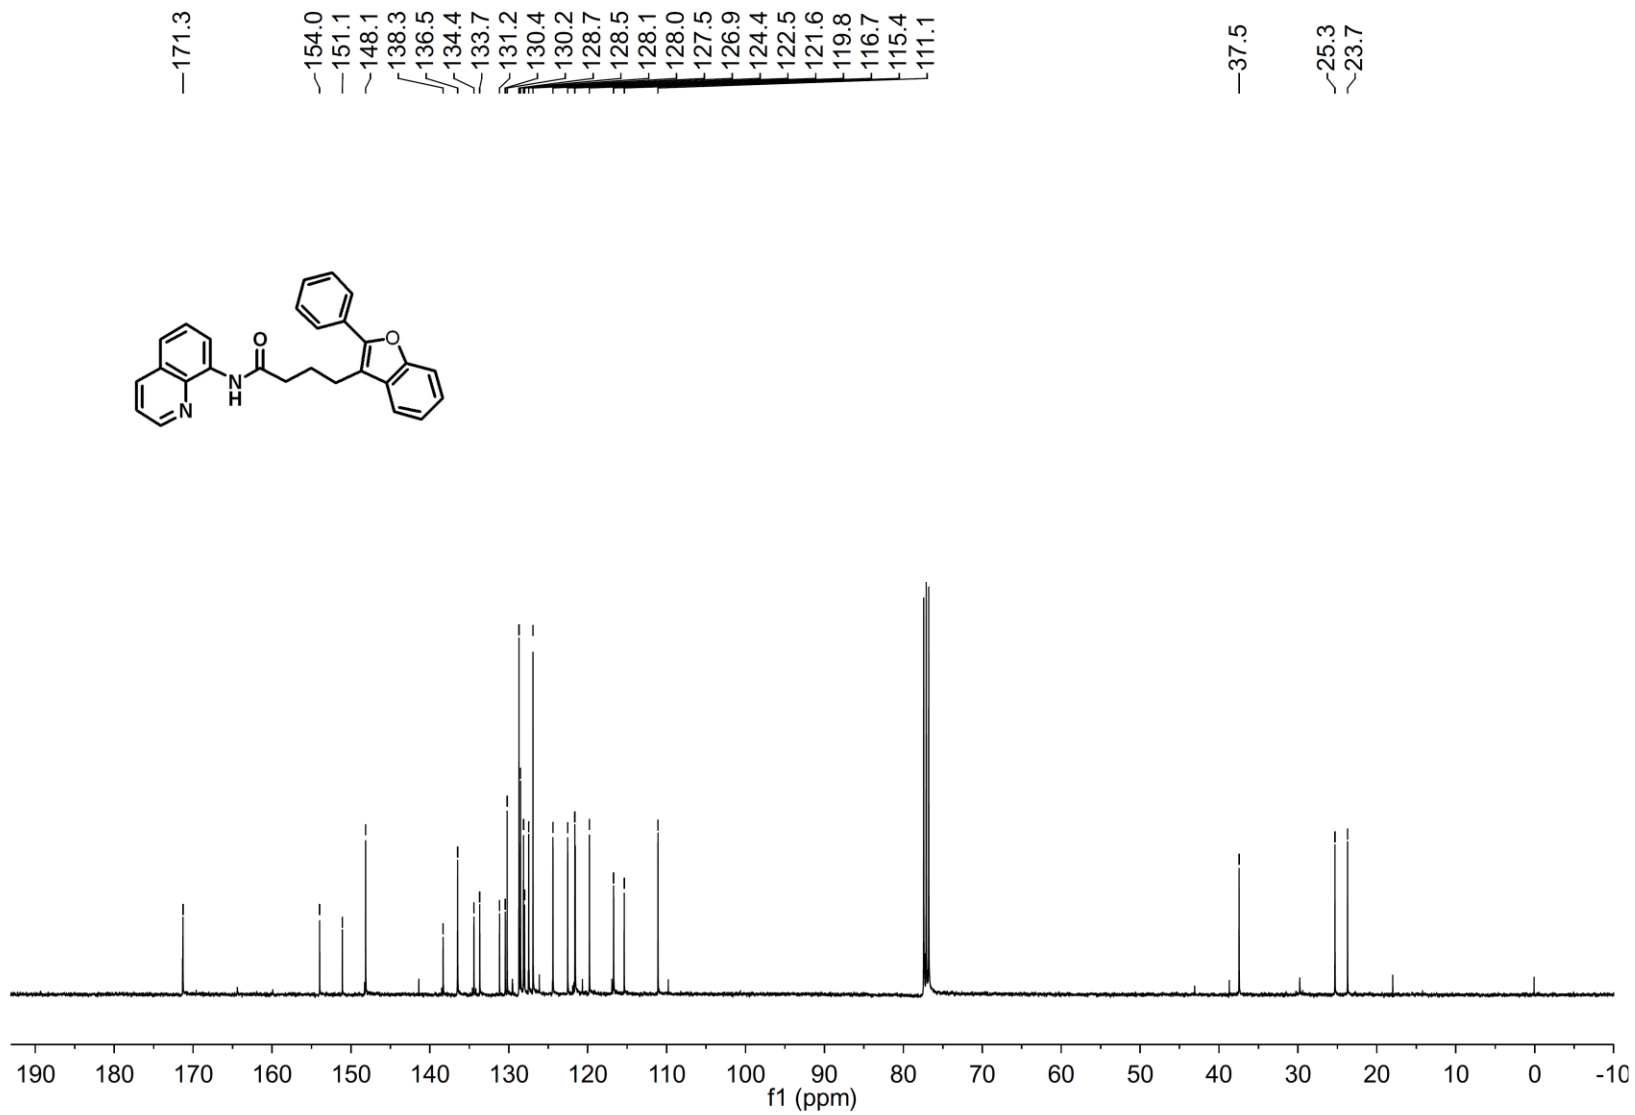

<sup>13</sup>C NMR Spectrum of Compound 3a



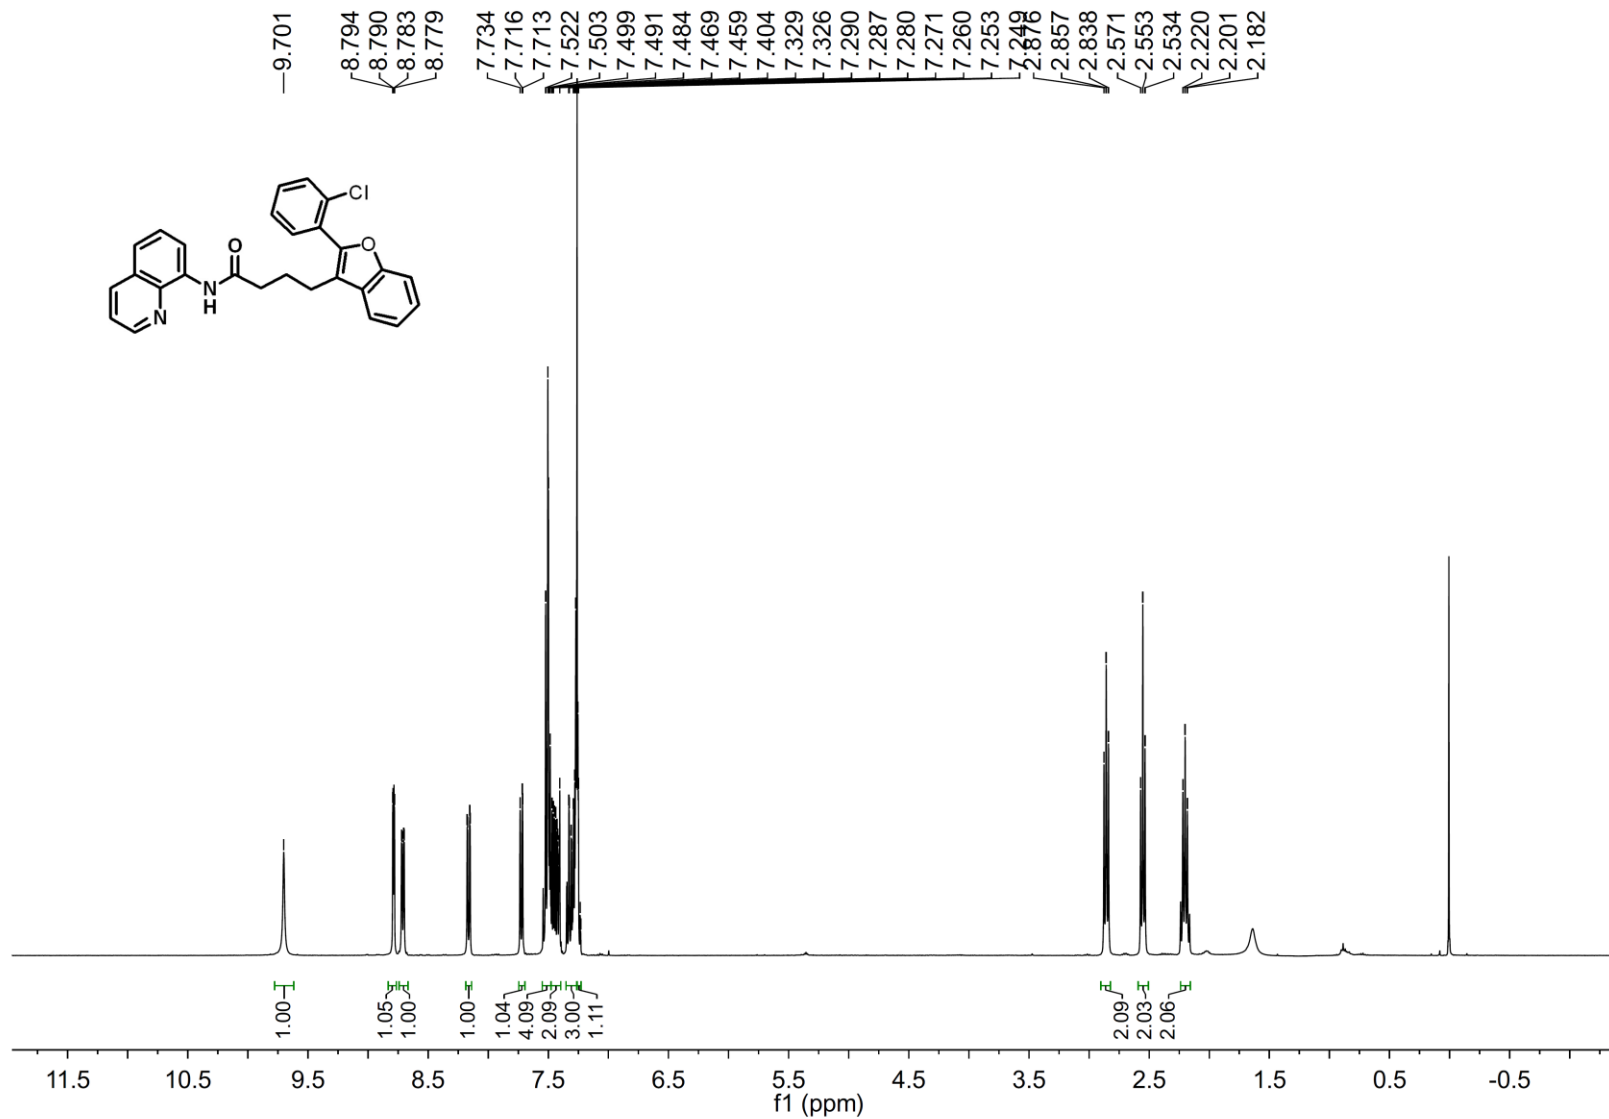

**<sup>1</sup>H NMR Spectrum of Compound 3b**

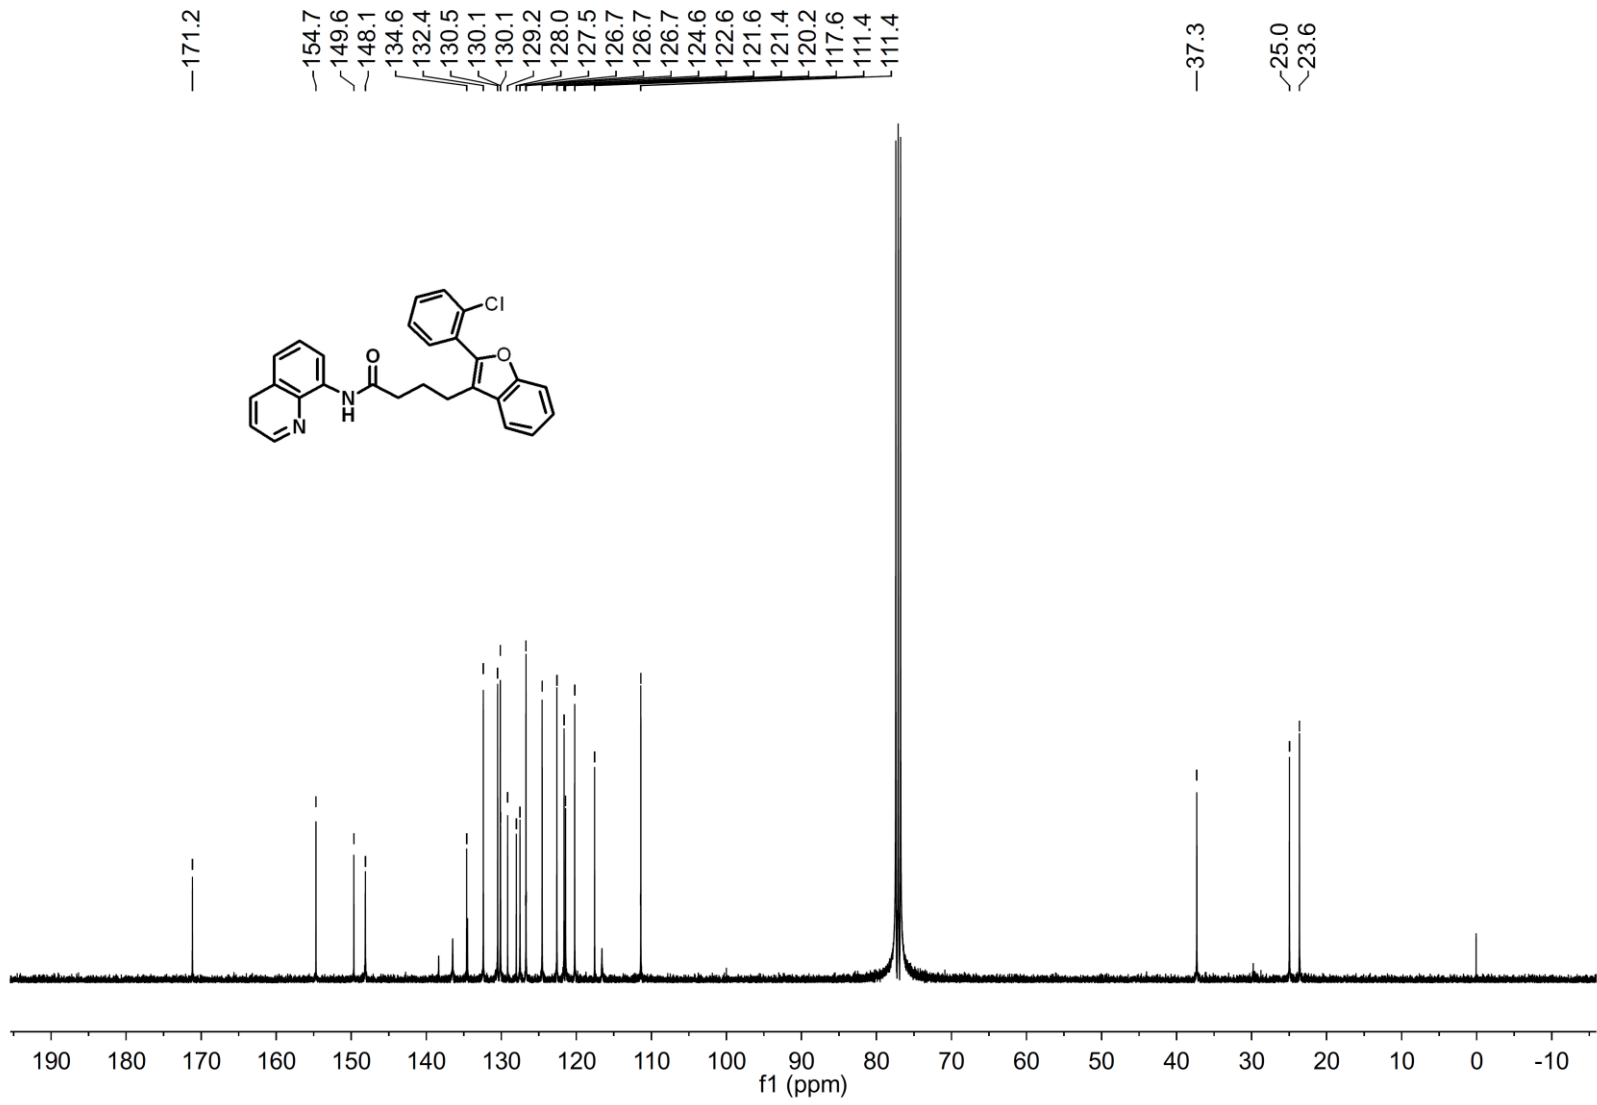

<sup>13</sup>C NMR Spectrum of Compound 3b

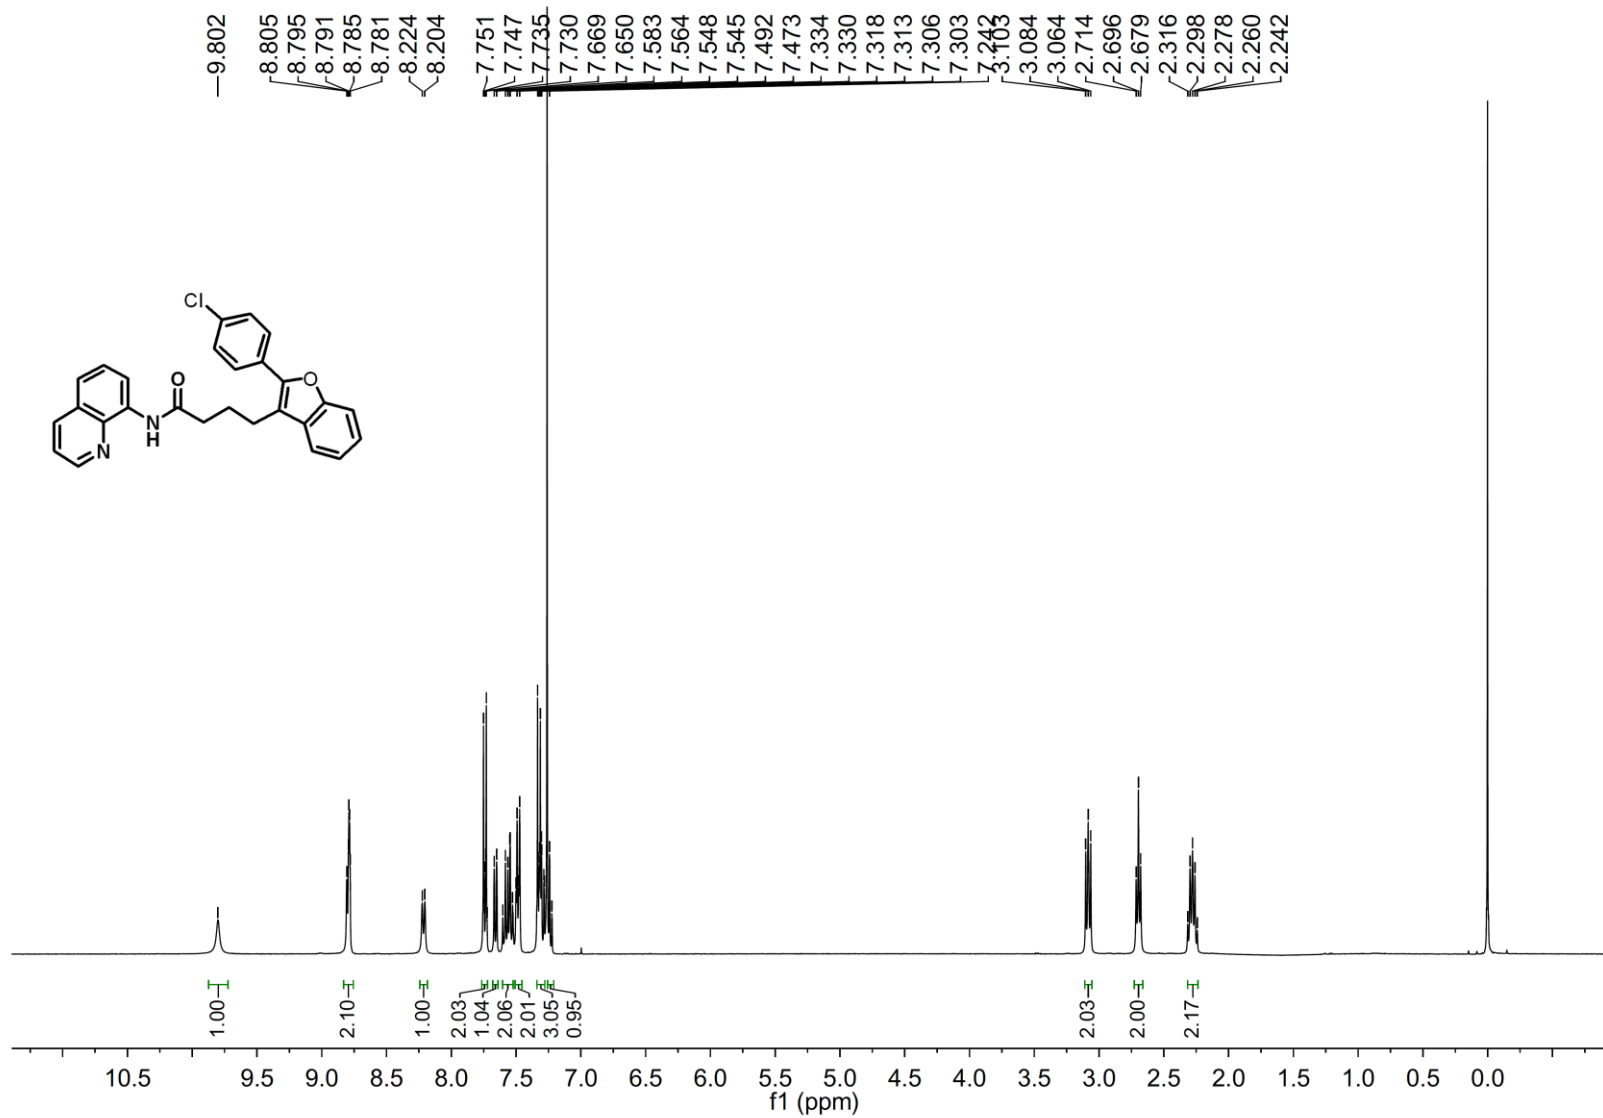

<sup>1</sup>H NMR Spectrum of Compound 3c

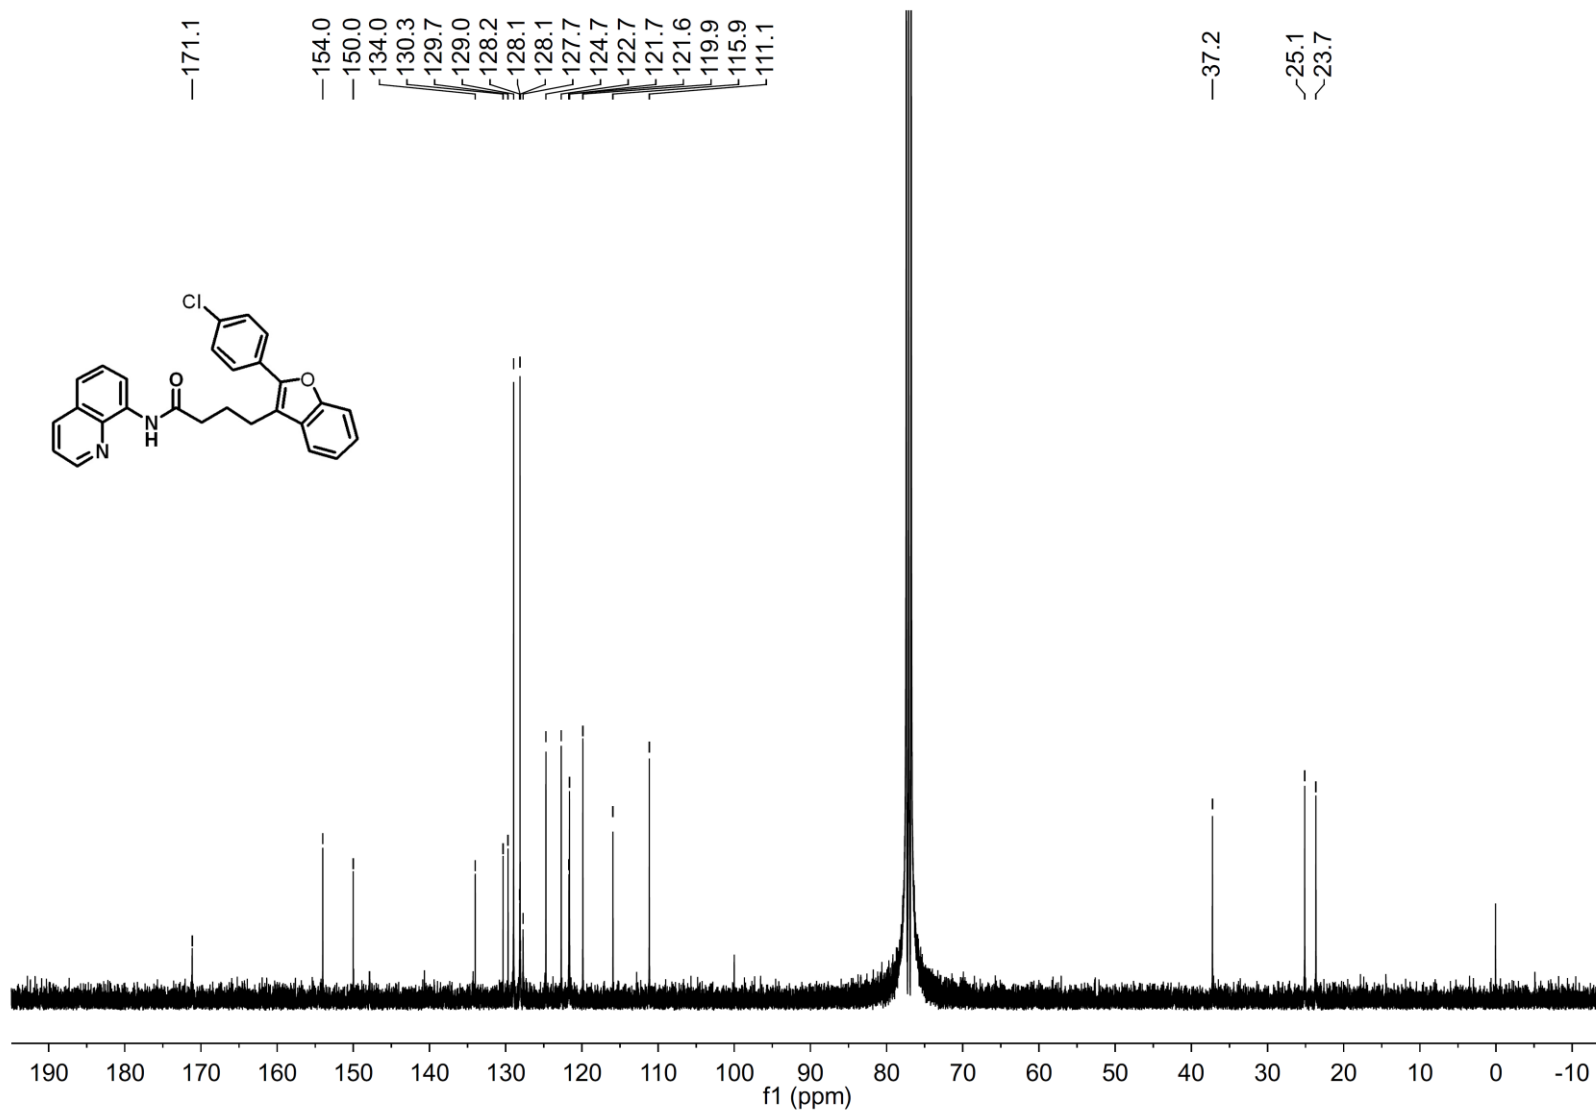

<sup>13</sup>C NMR Spectrum of Compound 3c

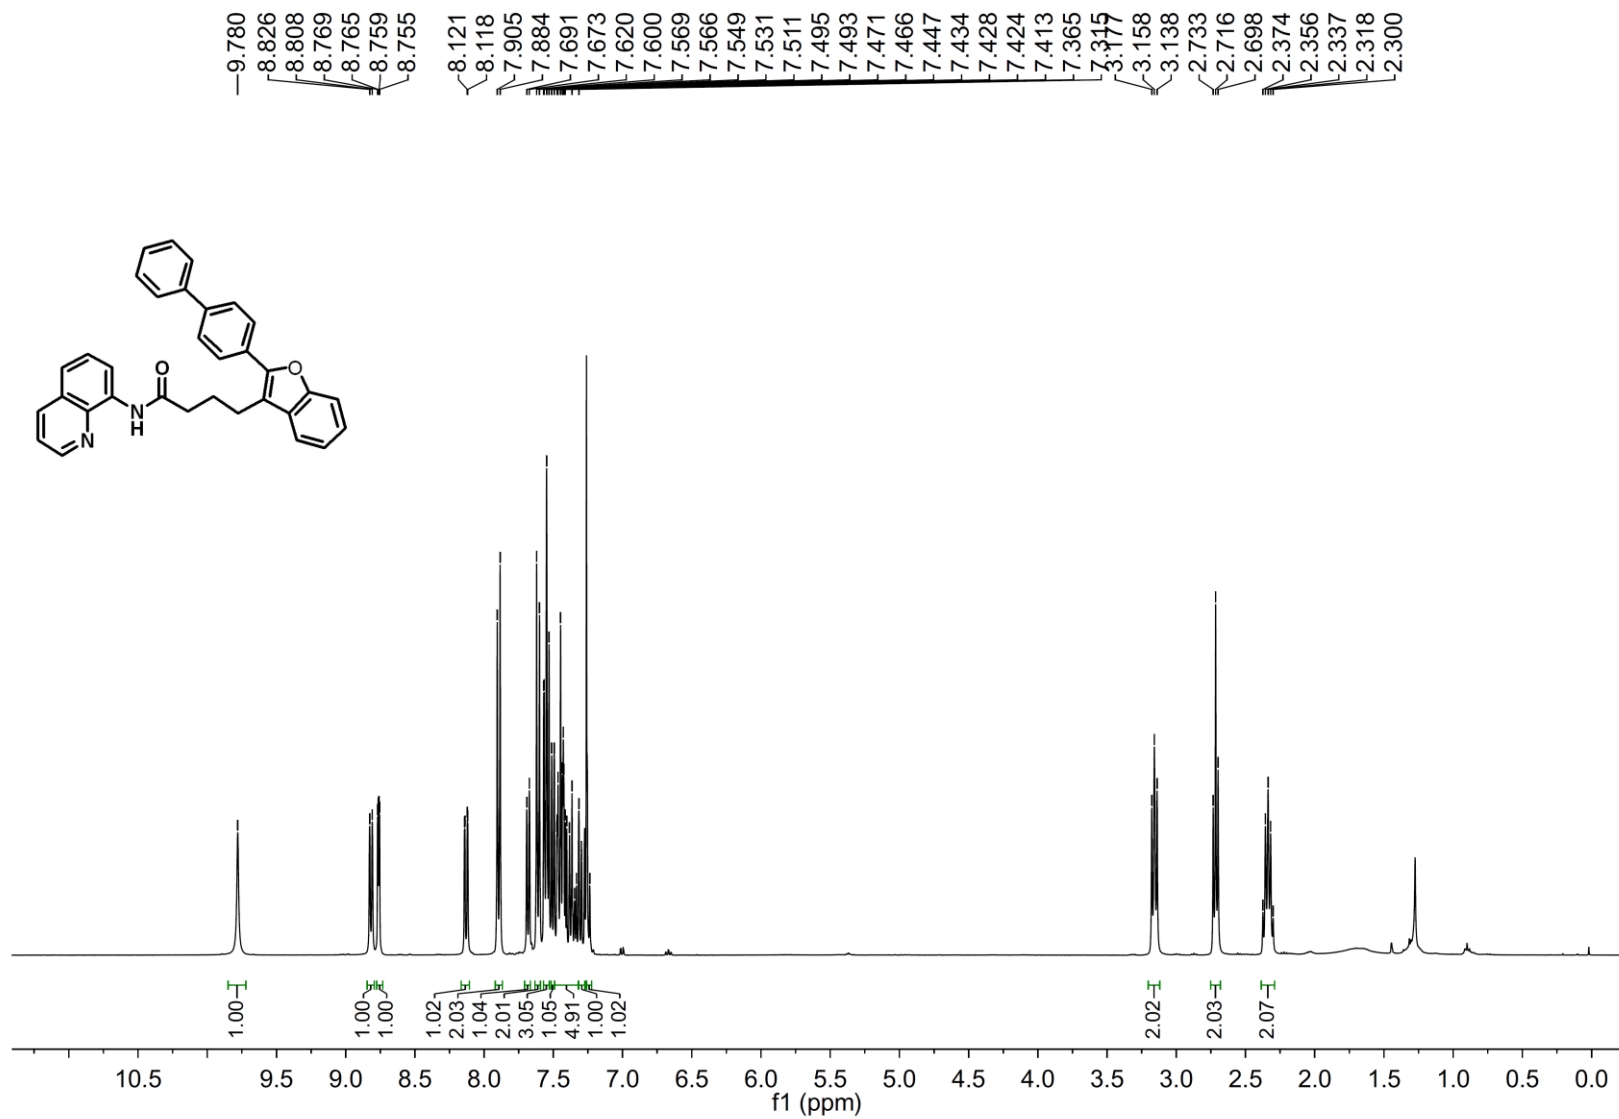

**<sup>1</sup>H NMR Spectrum of Compound 3d**

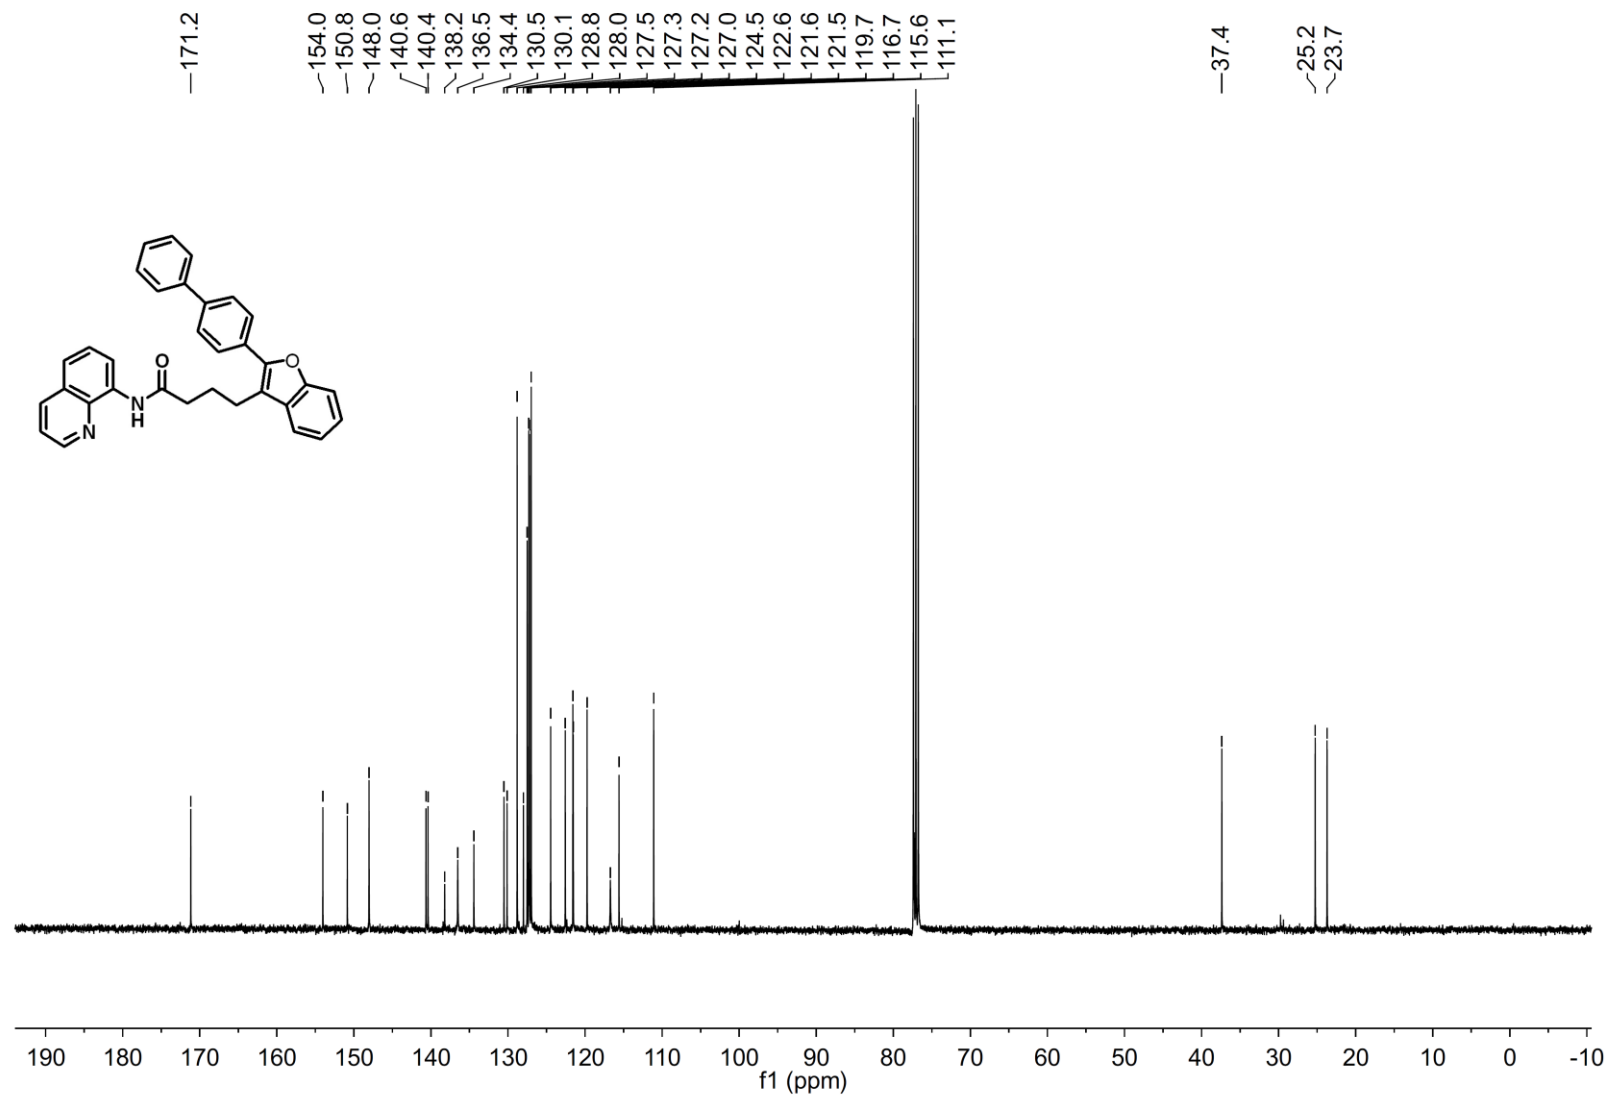

<sup>13</sup>C NMR Spectrum of Compound 3d

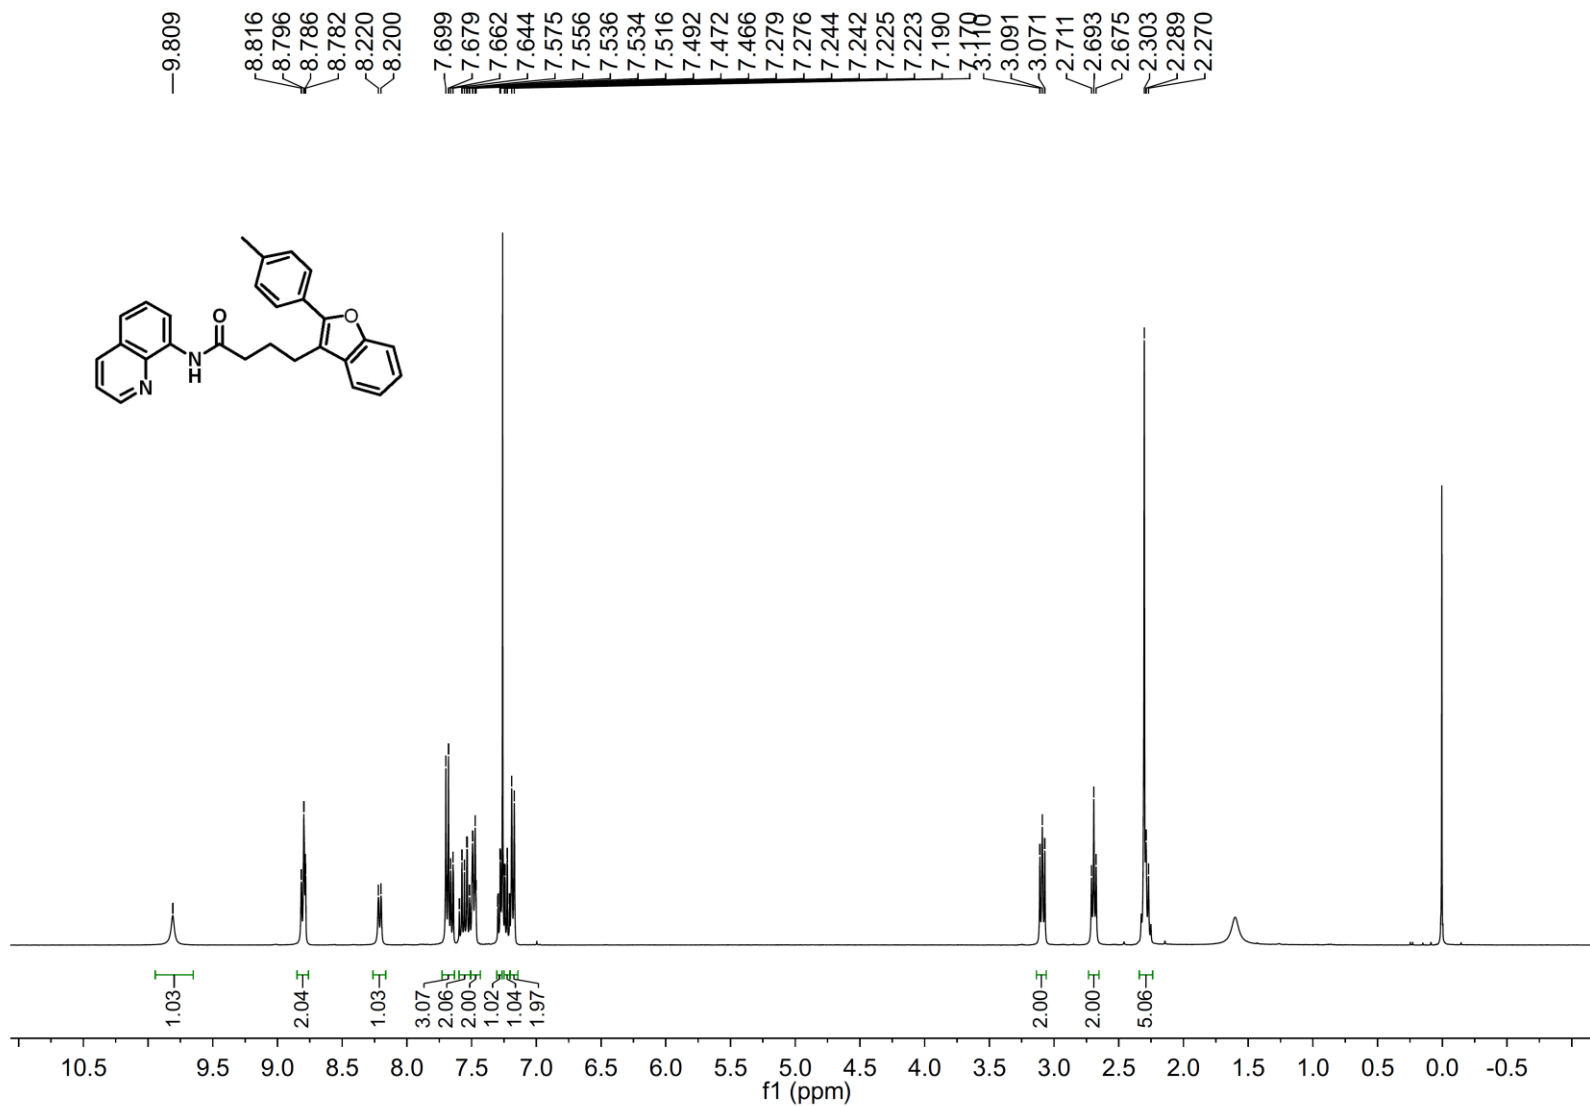

<sup>1</sup>H NMR Spectrum of Compound 3e

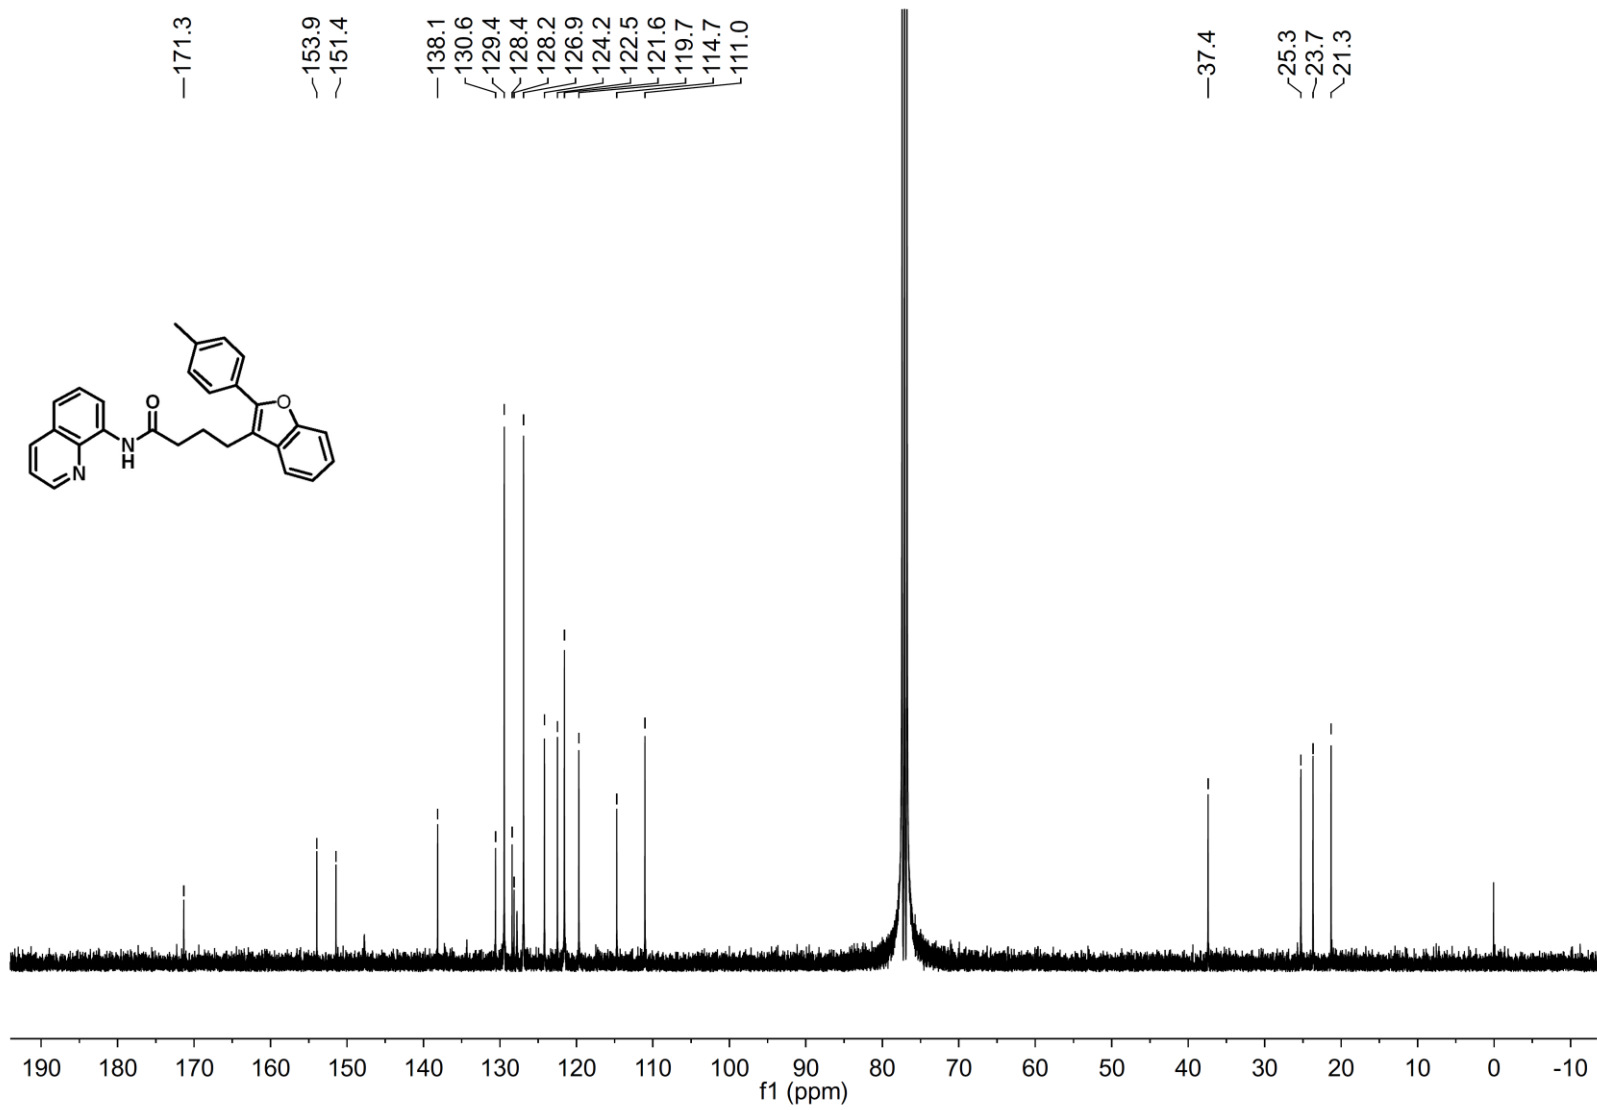

<sup>13</sup>C NMR Spectrum of Compound 3e



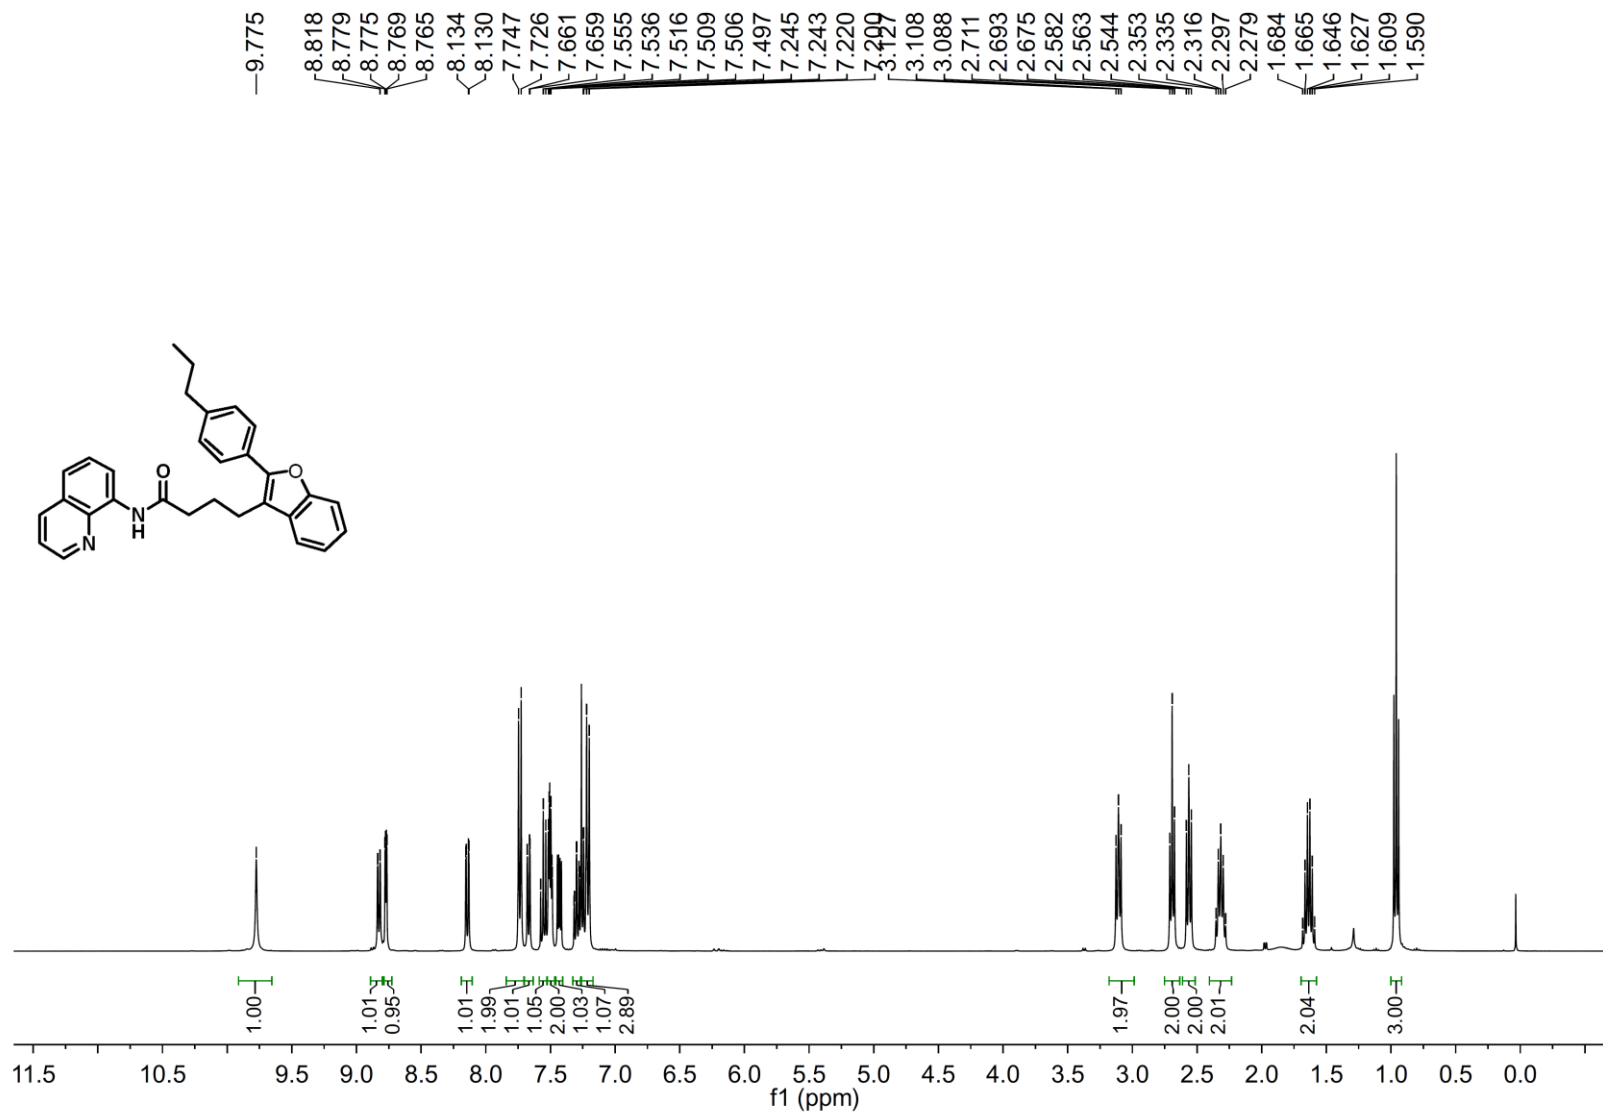

<sup>1</sup>H NMR Spectrum of Compound 3f

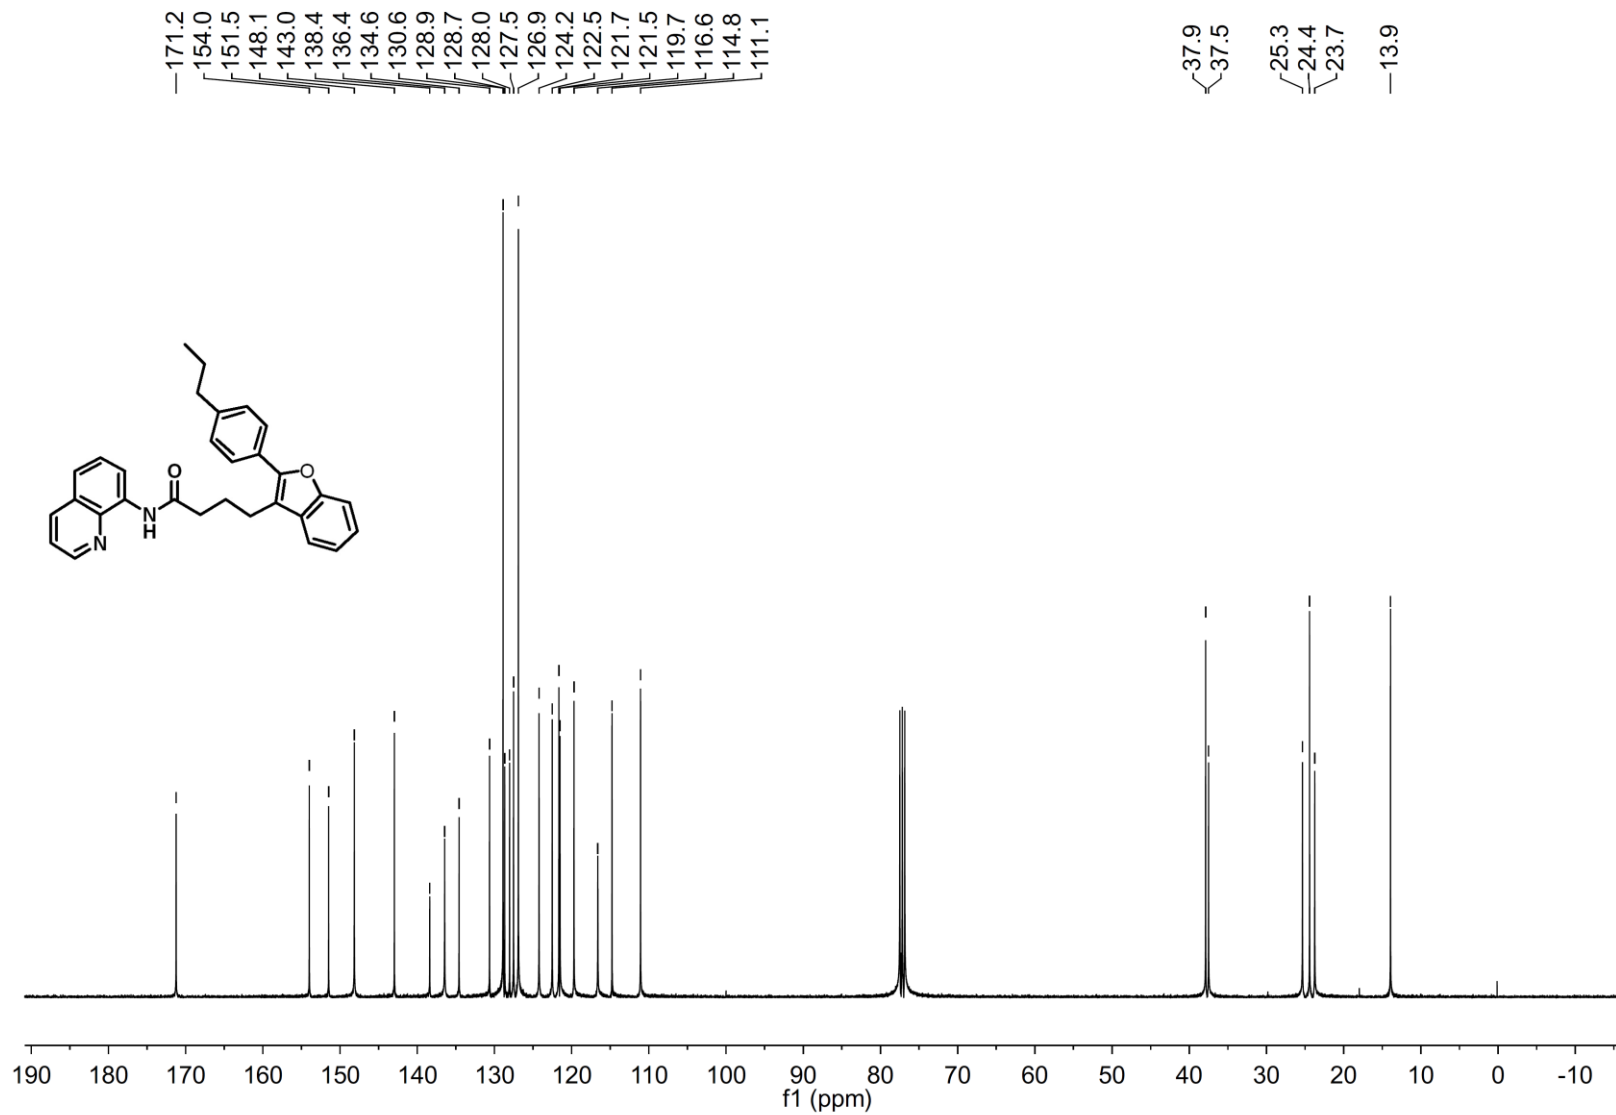

$^{13}\text{C}$  NMR Spectrum of Compound 3f

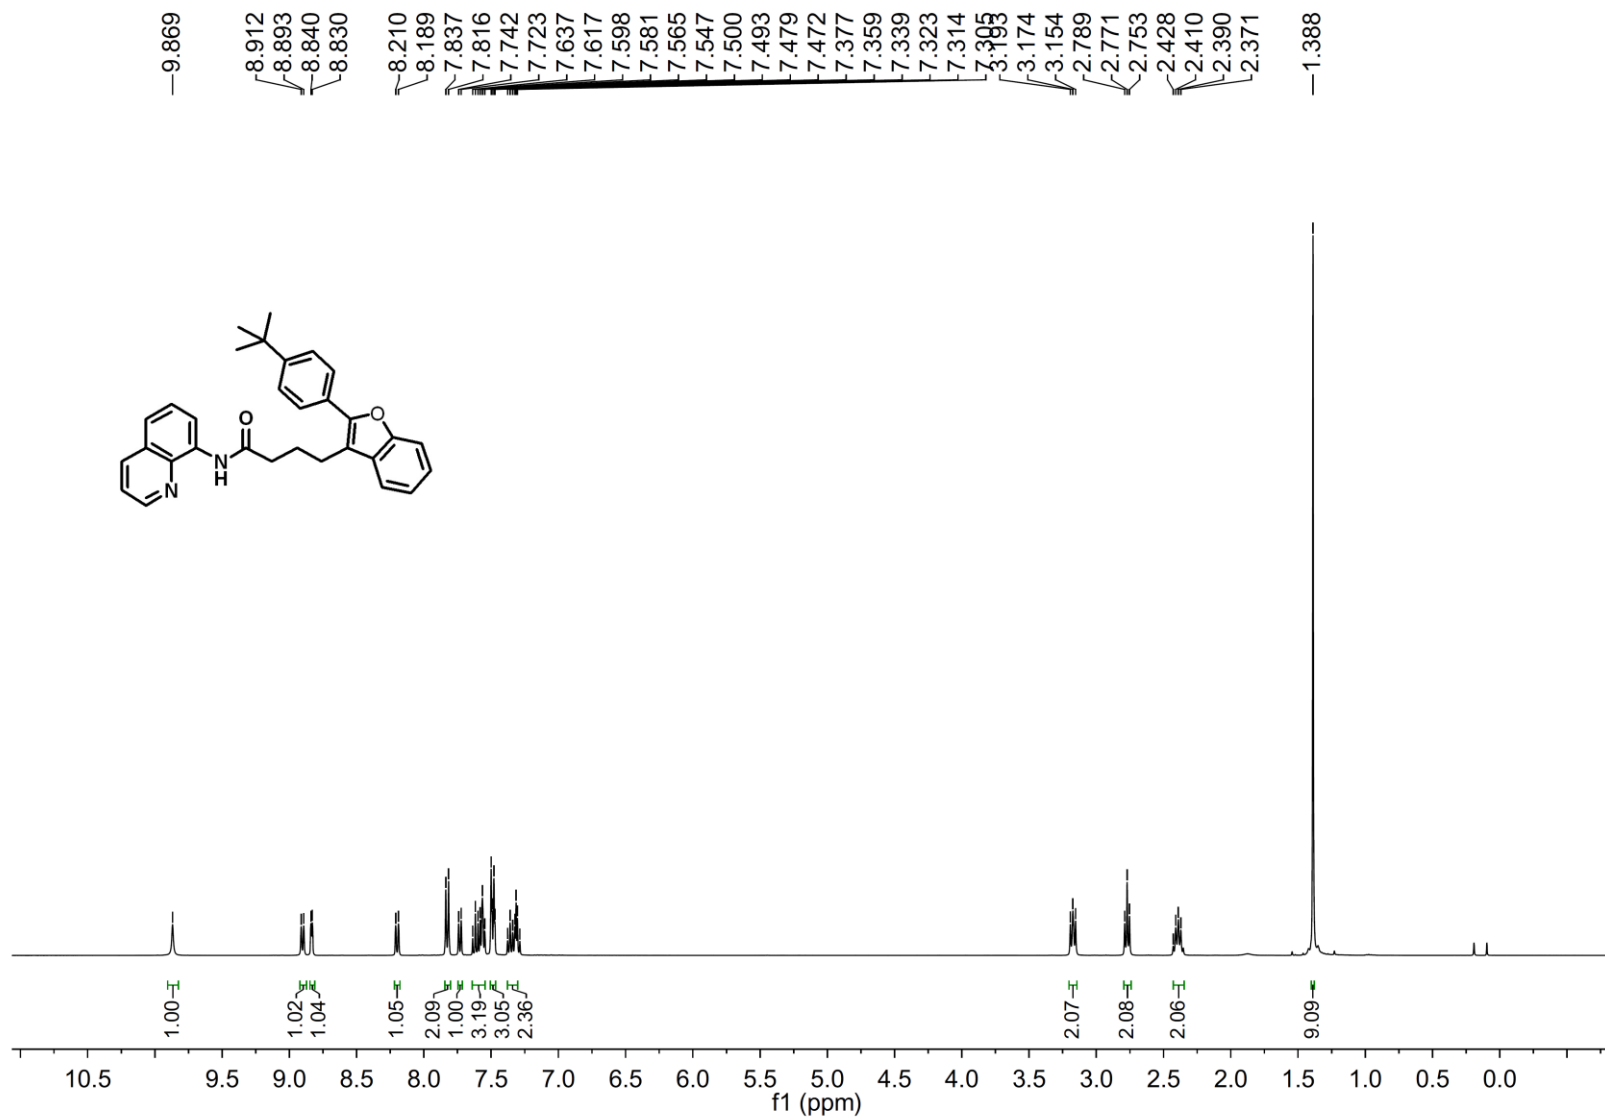

<sup>1</sup>H NMR Spectrum of Compound 3g

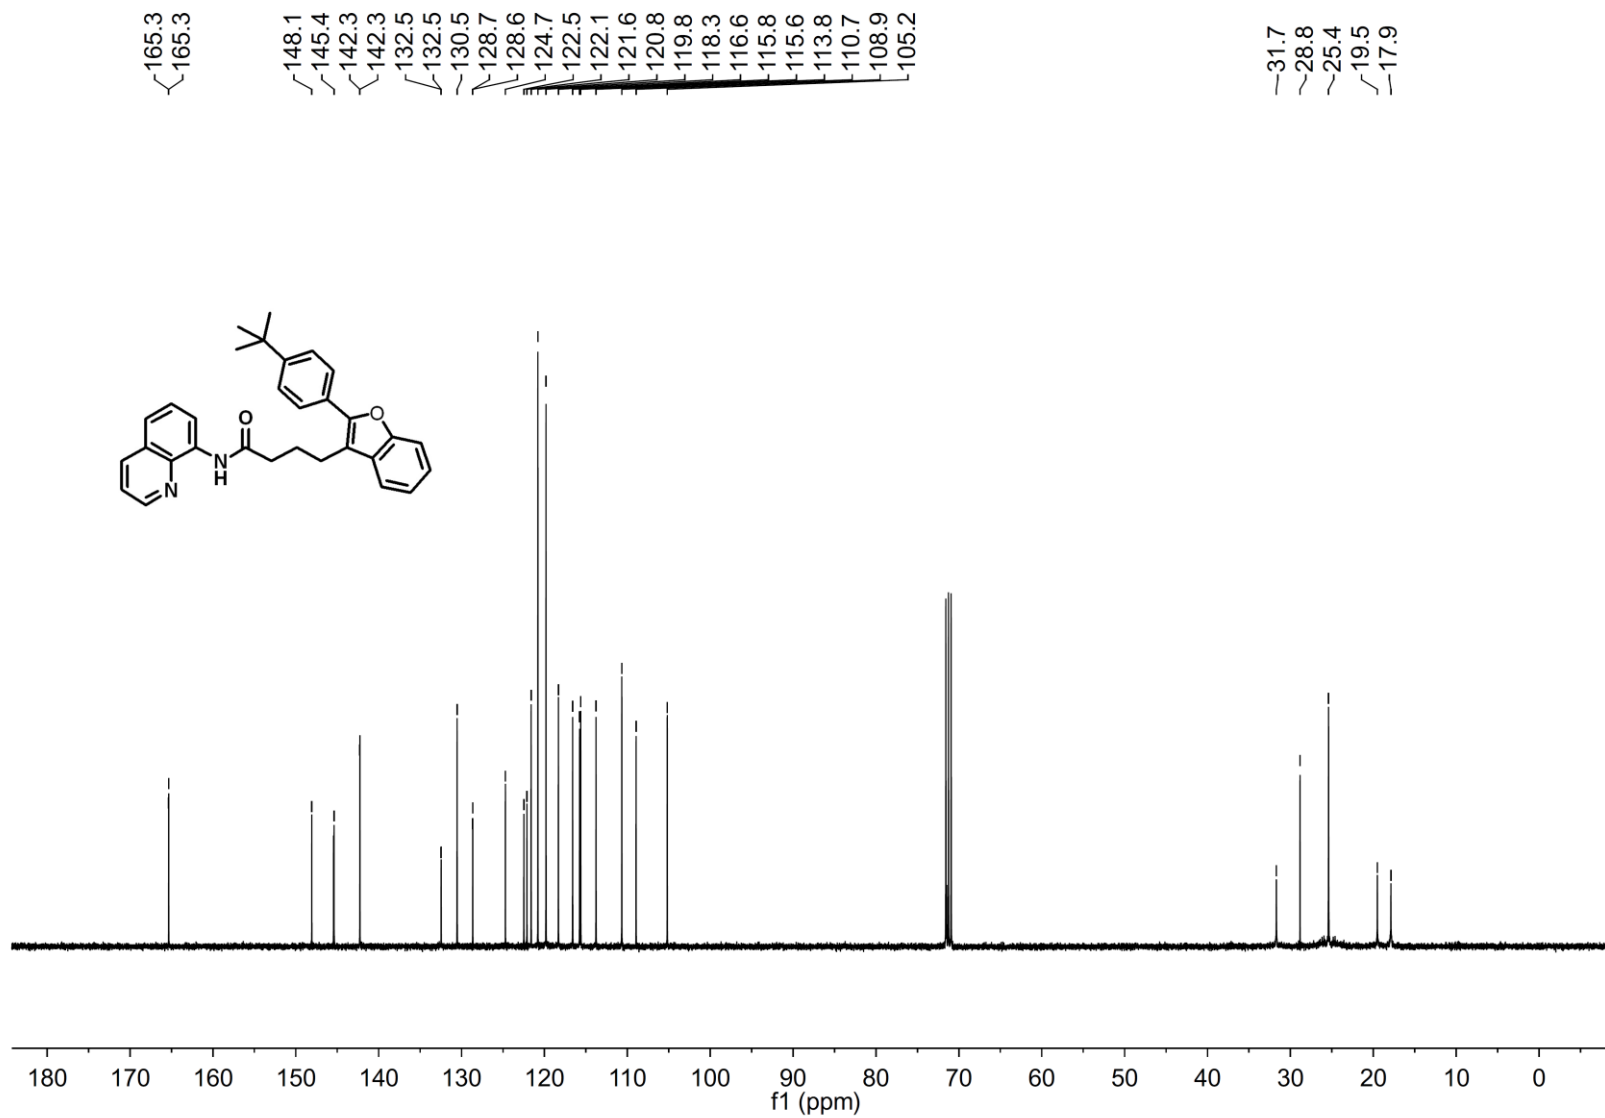

<sup>13</sup>C NMR Spectrum of Compound 3g

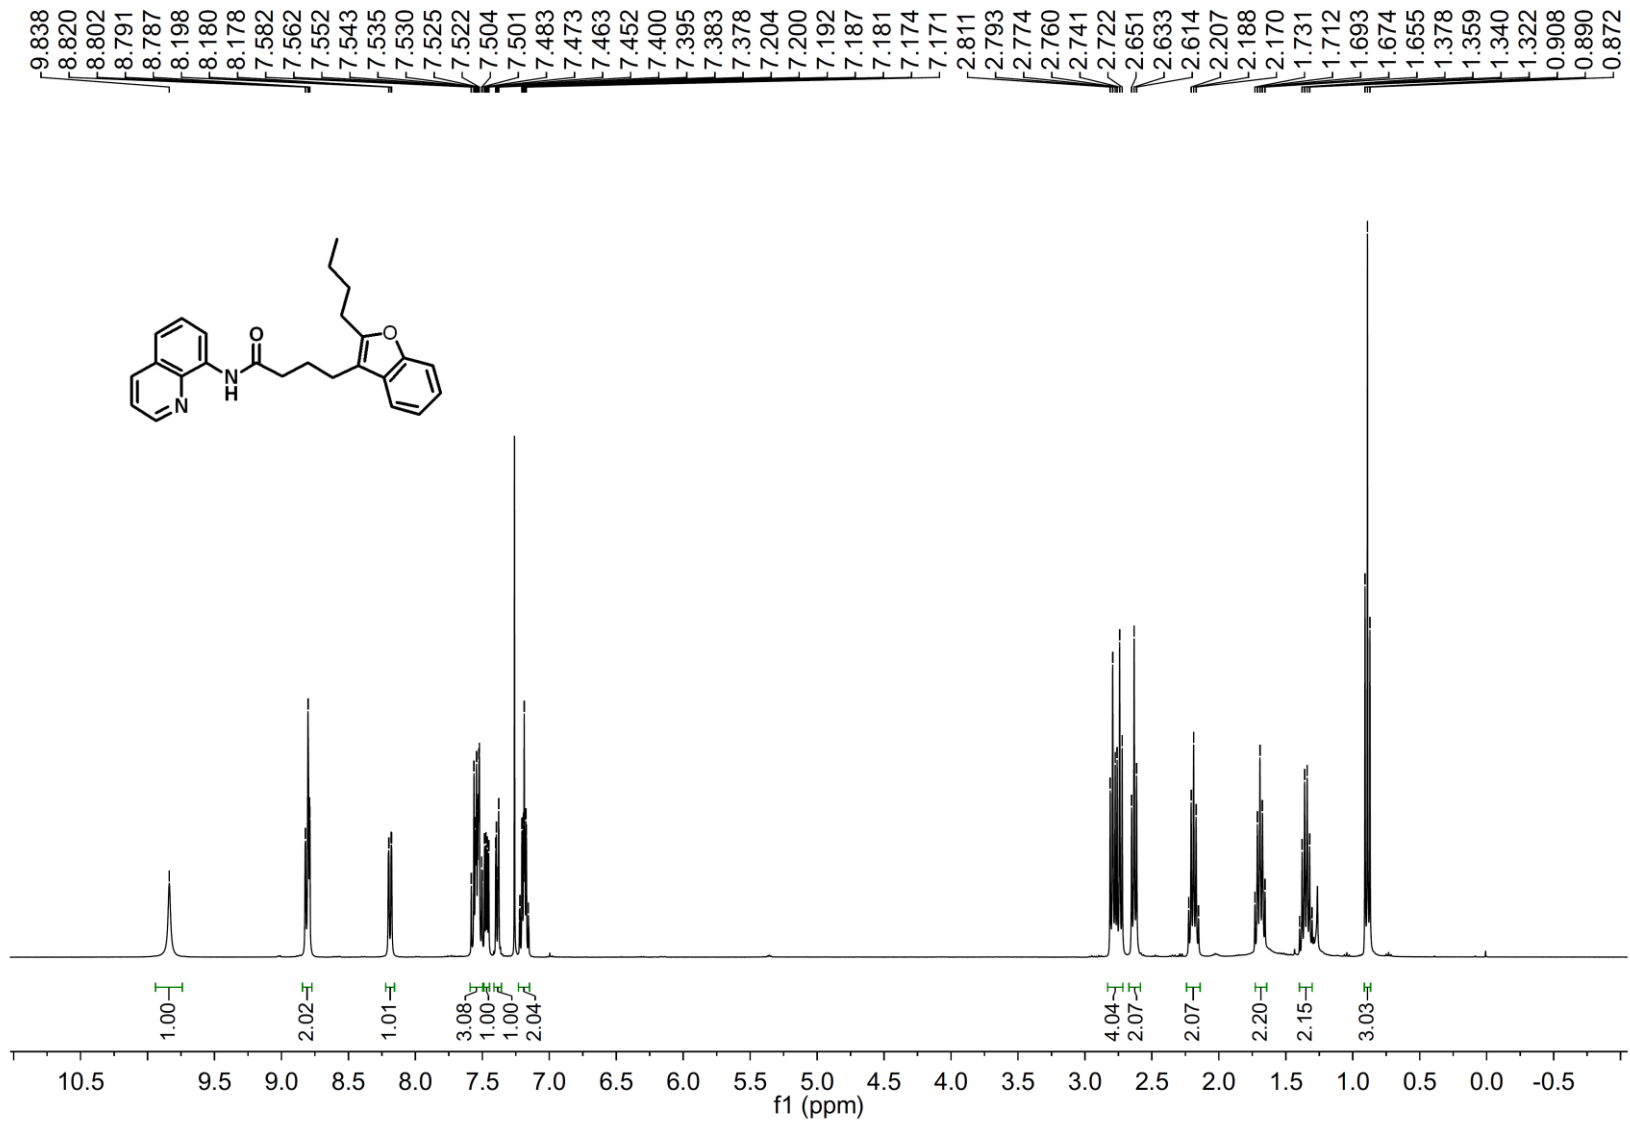

<sup>1</sup>H NMR Spectrum of Compound 3h

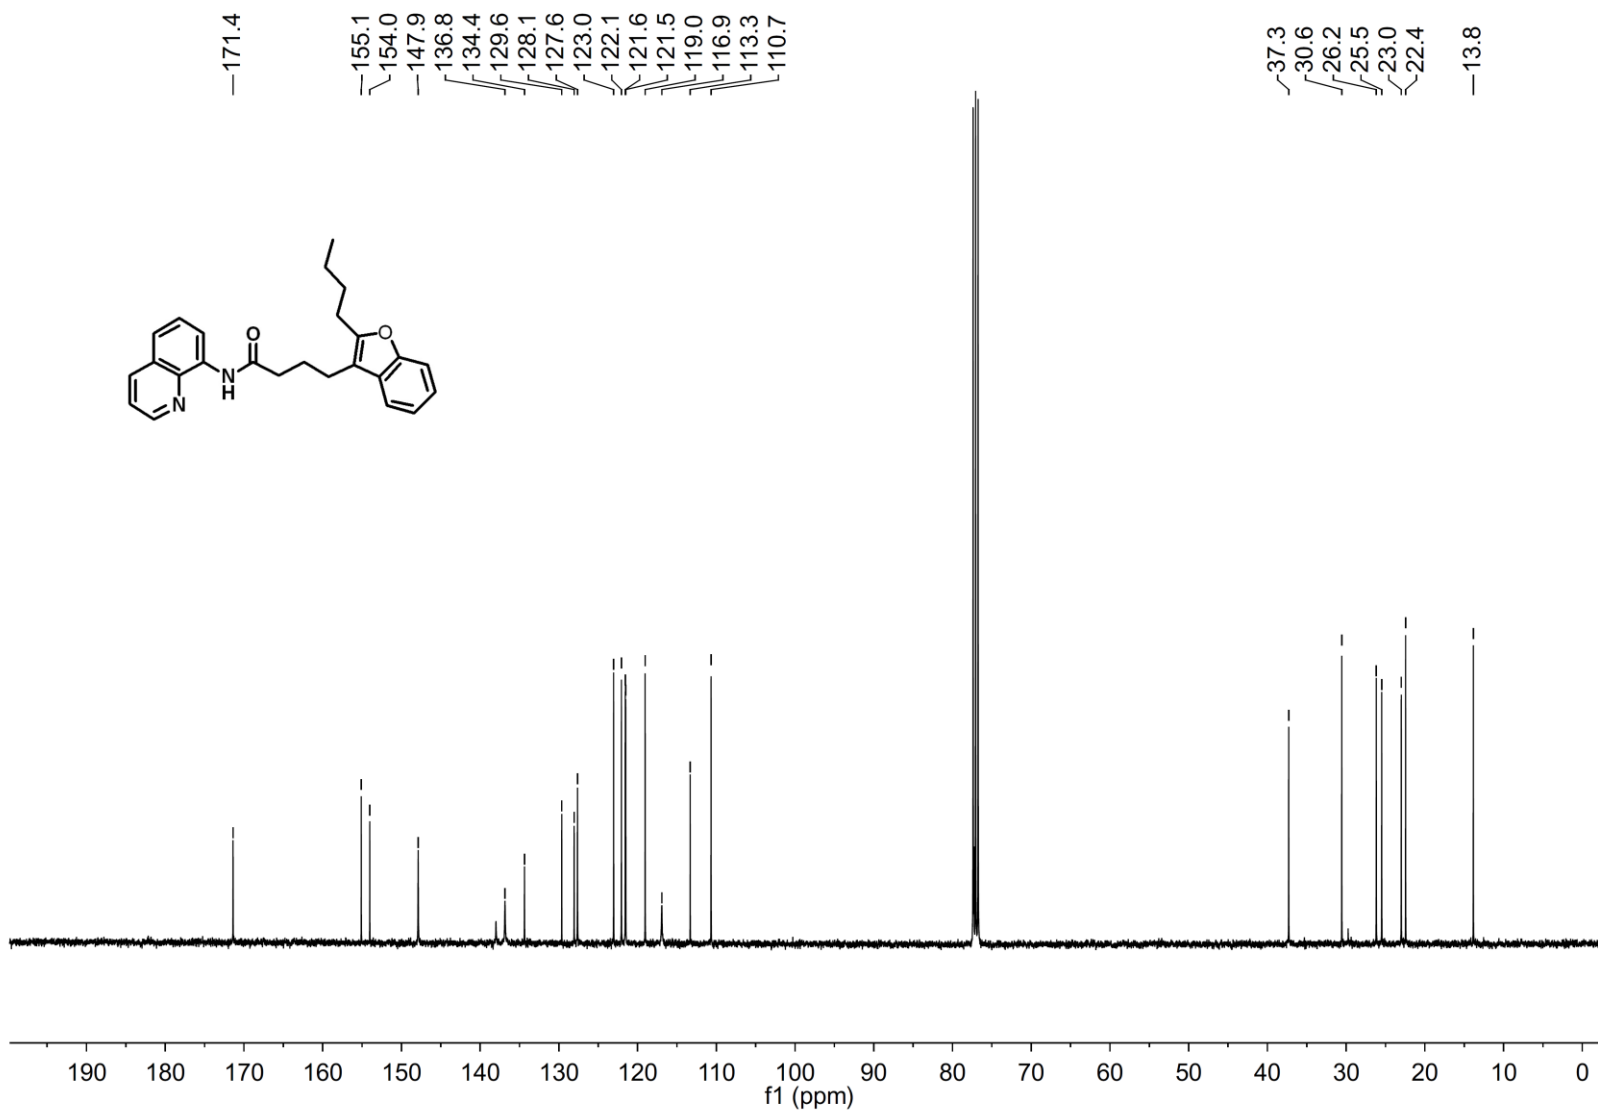

<sup>13</sup>C NMR Spectrum of Compound 3h

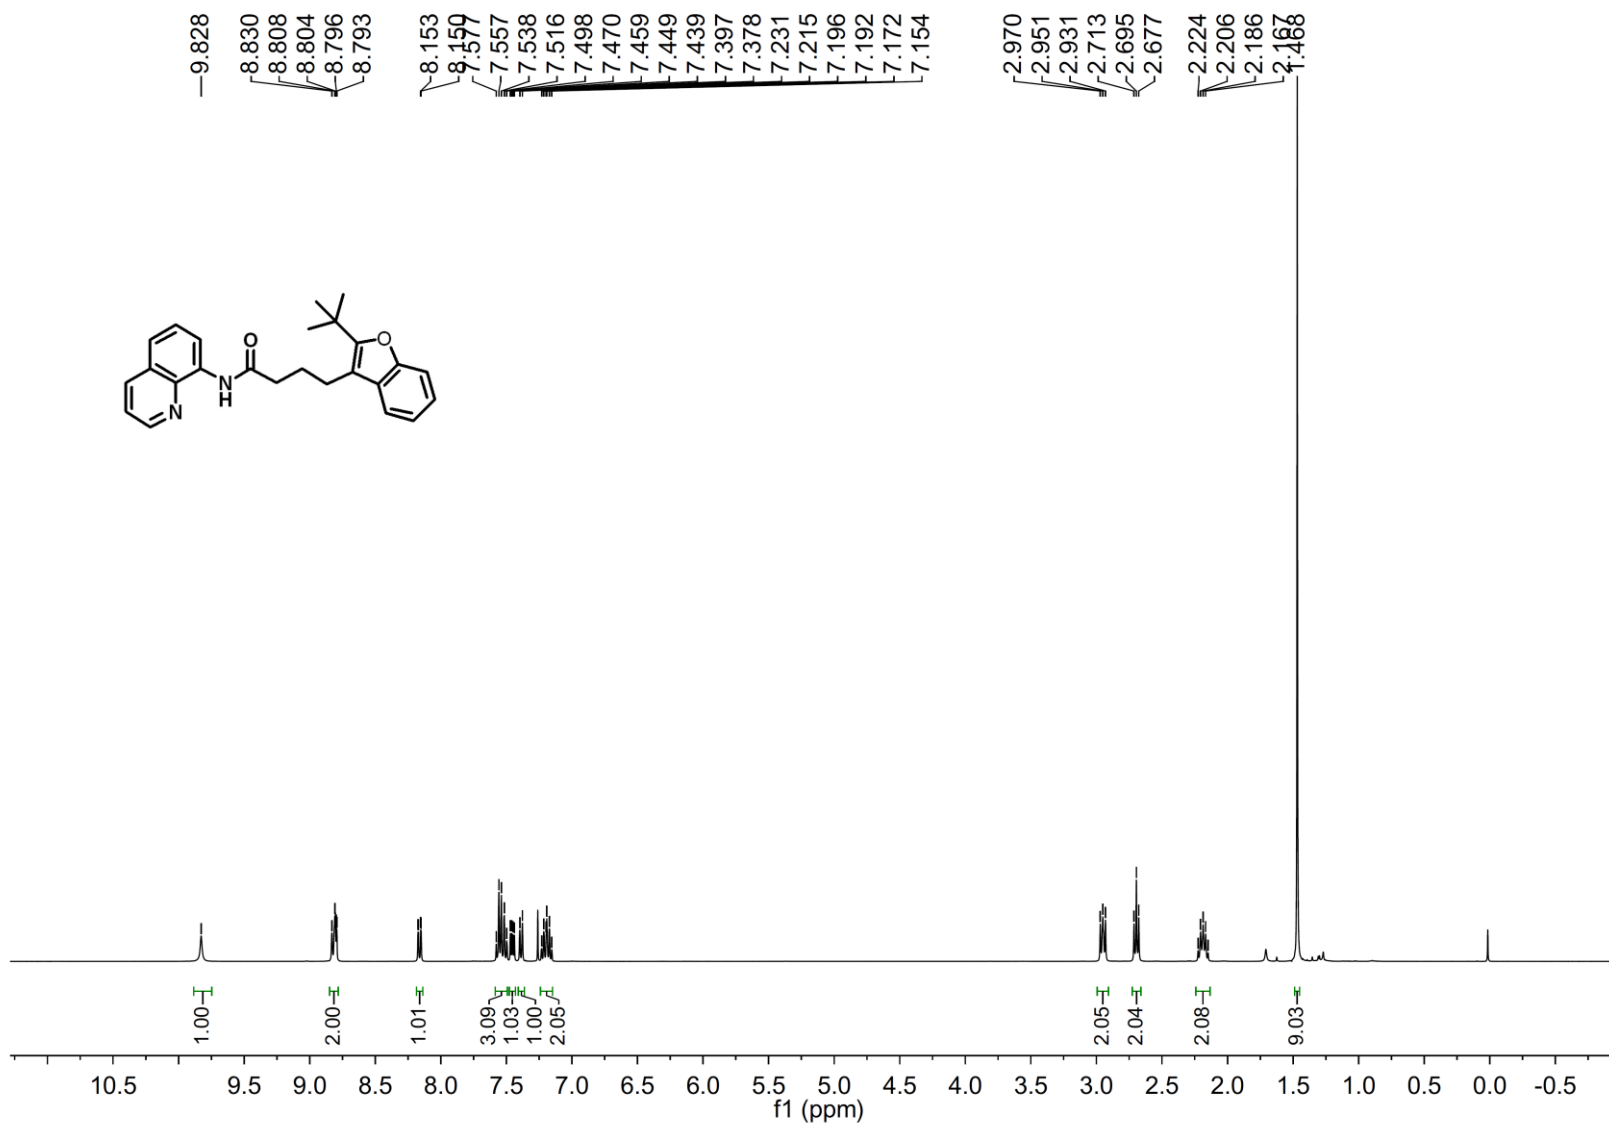

**<sup>1</sup>H NMR Spectrum of Compound 3i**

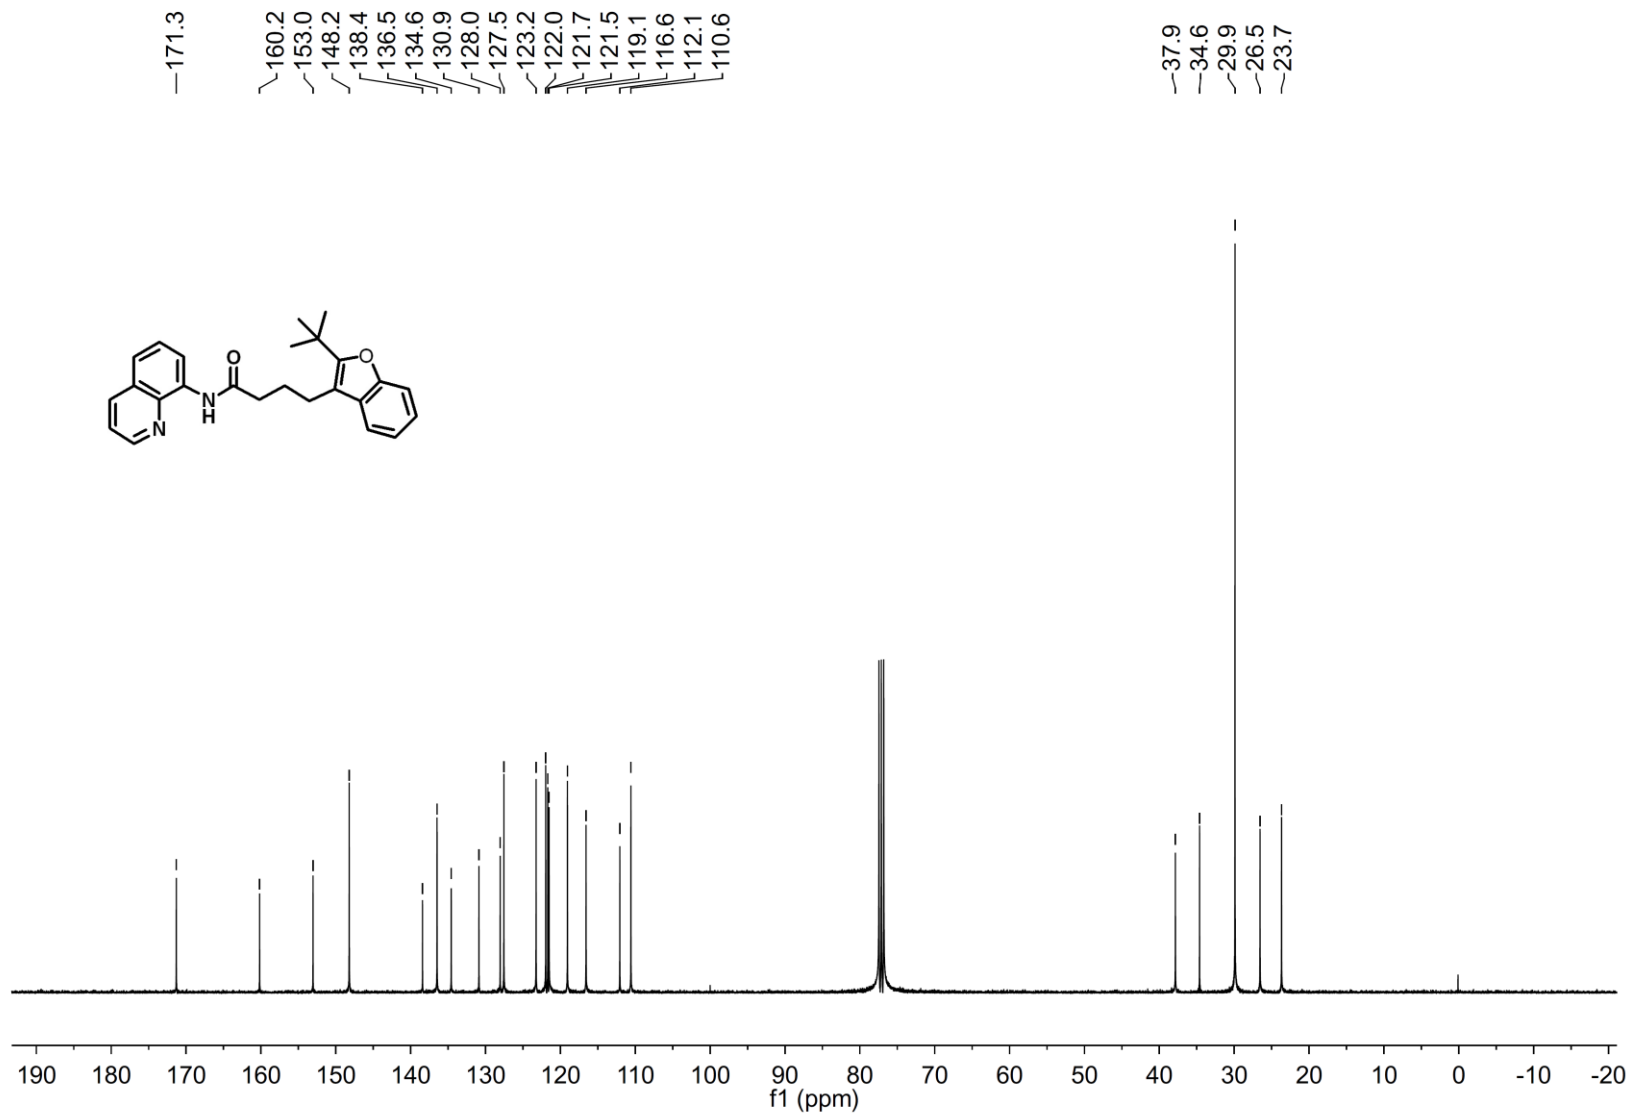

<sup>13</sup>C NMR Spectrum of Compound 3i



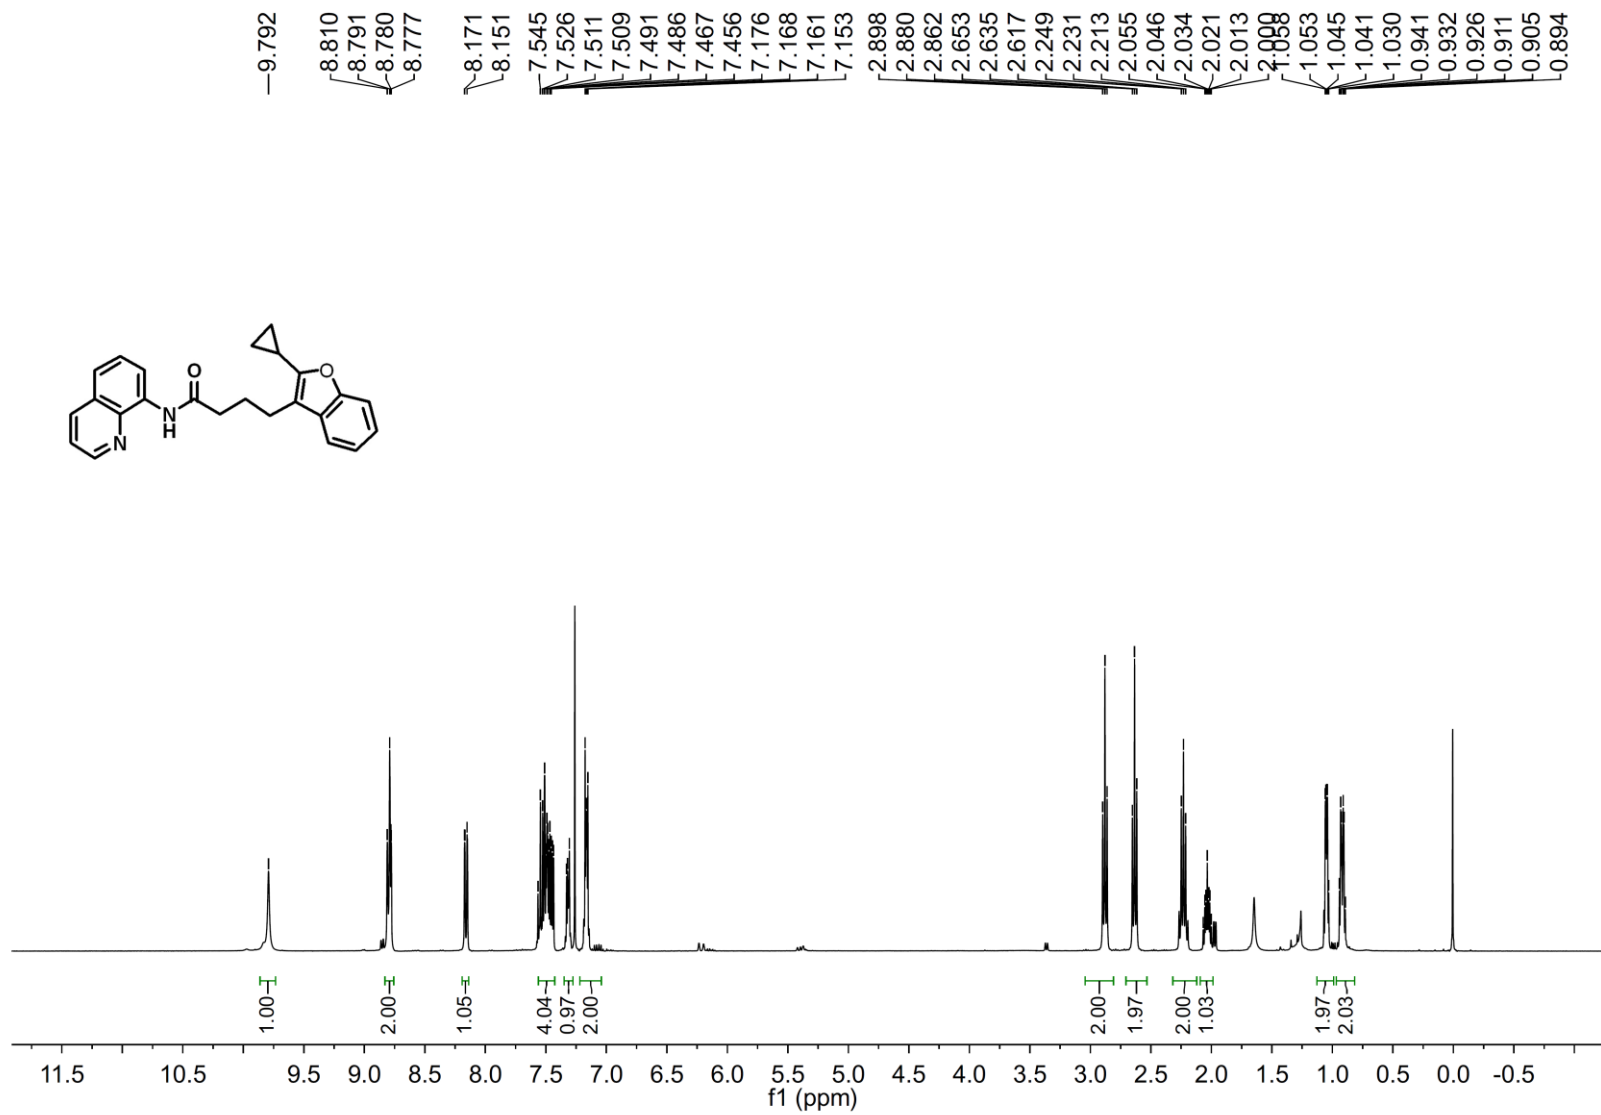

<sup>1</sup>H NMR Spectrum of Compound 3j

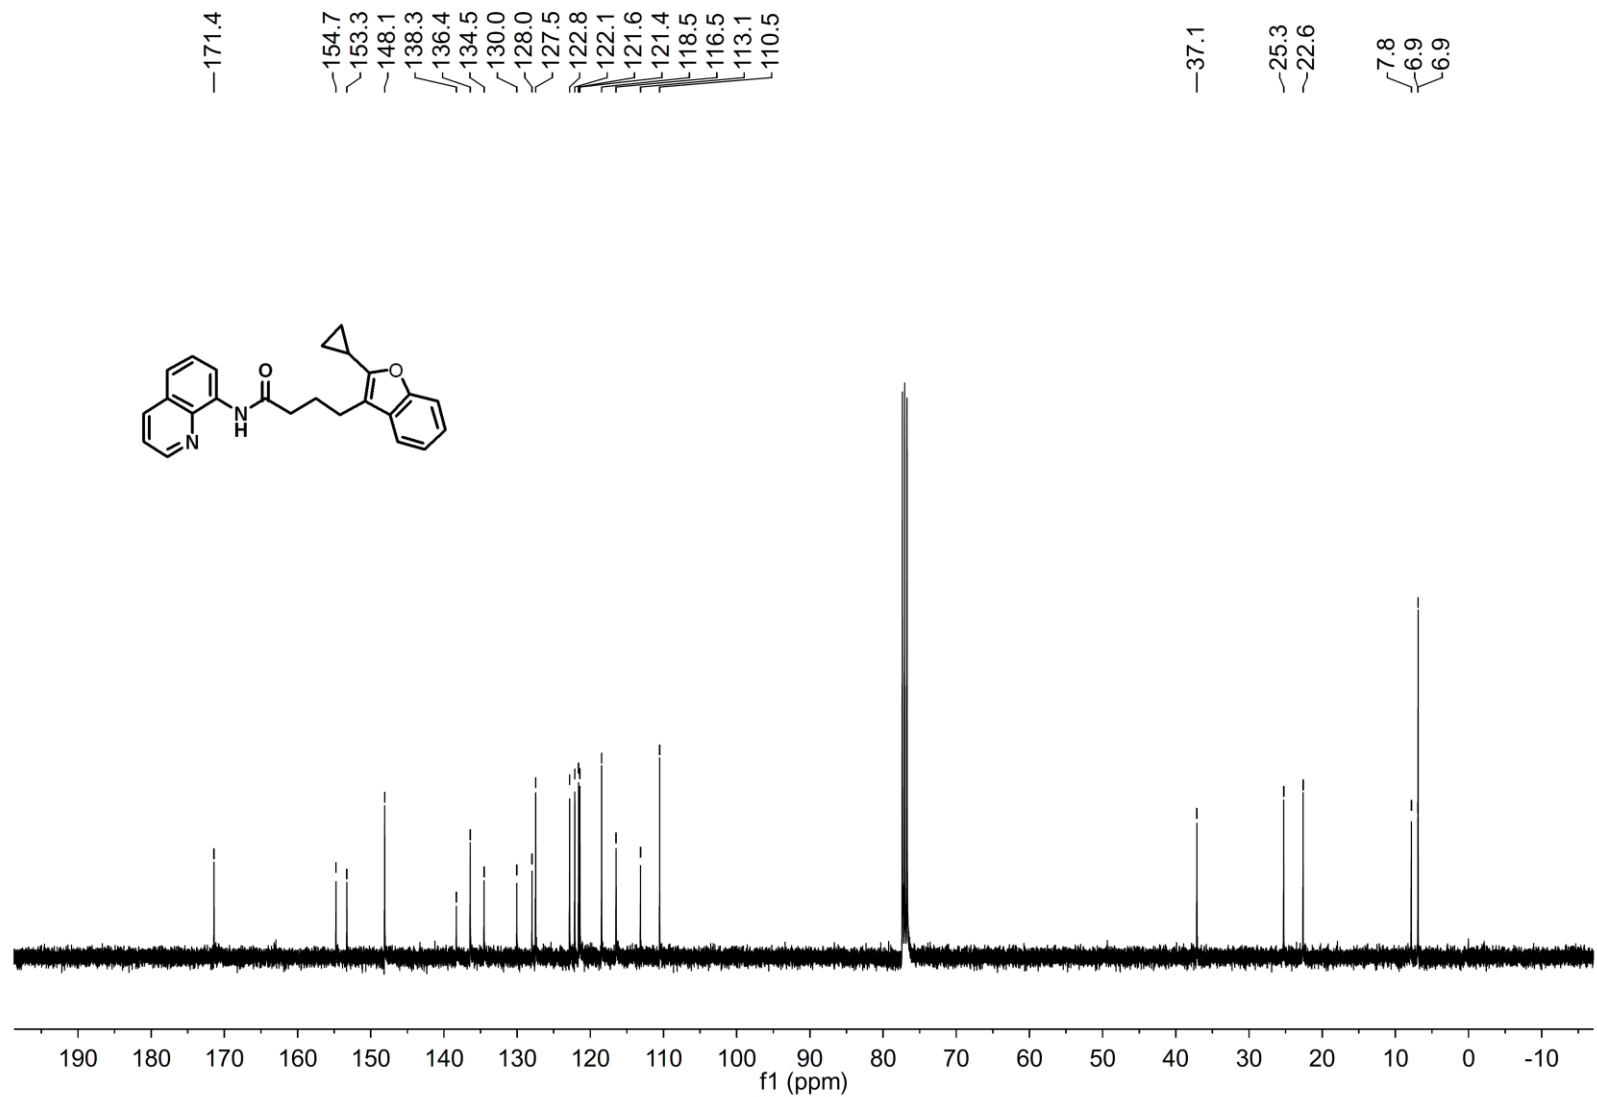

<sup>13</sup>C NMR Spectrum of Compound 3j

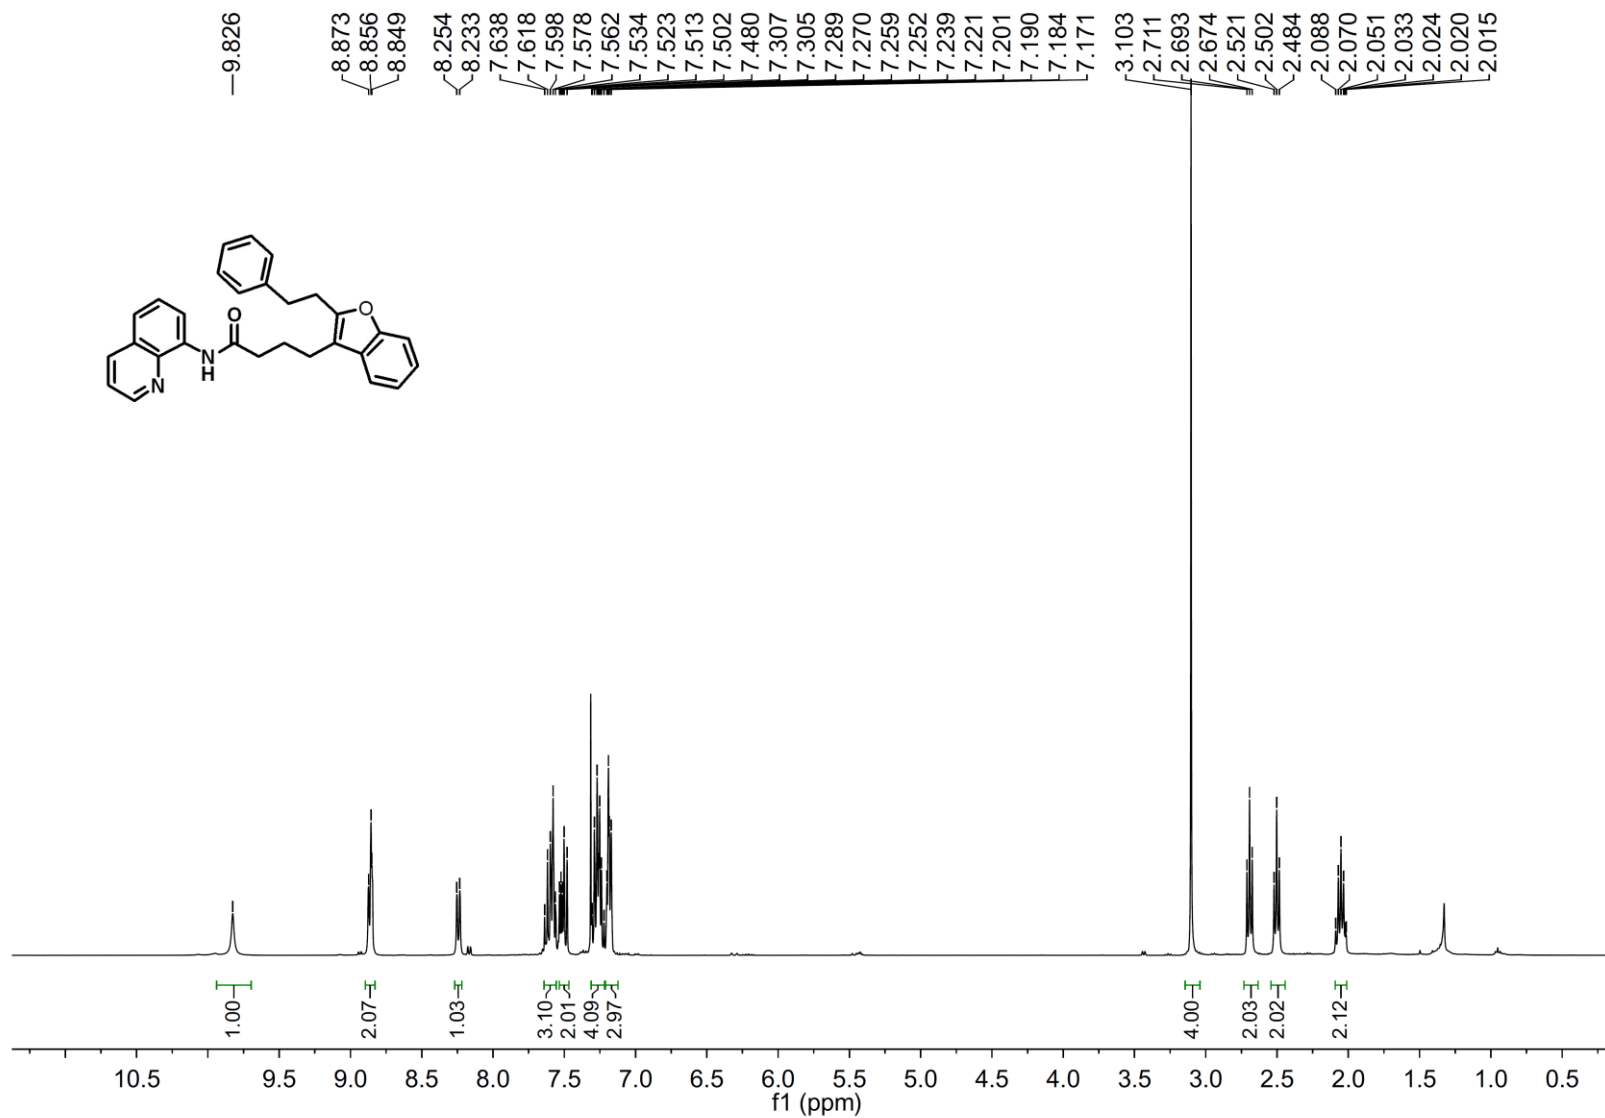

<sup>1</sup>H NMR Spectrum of Compound 3k

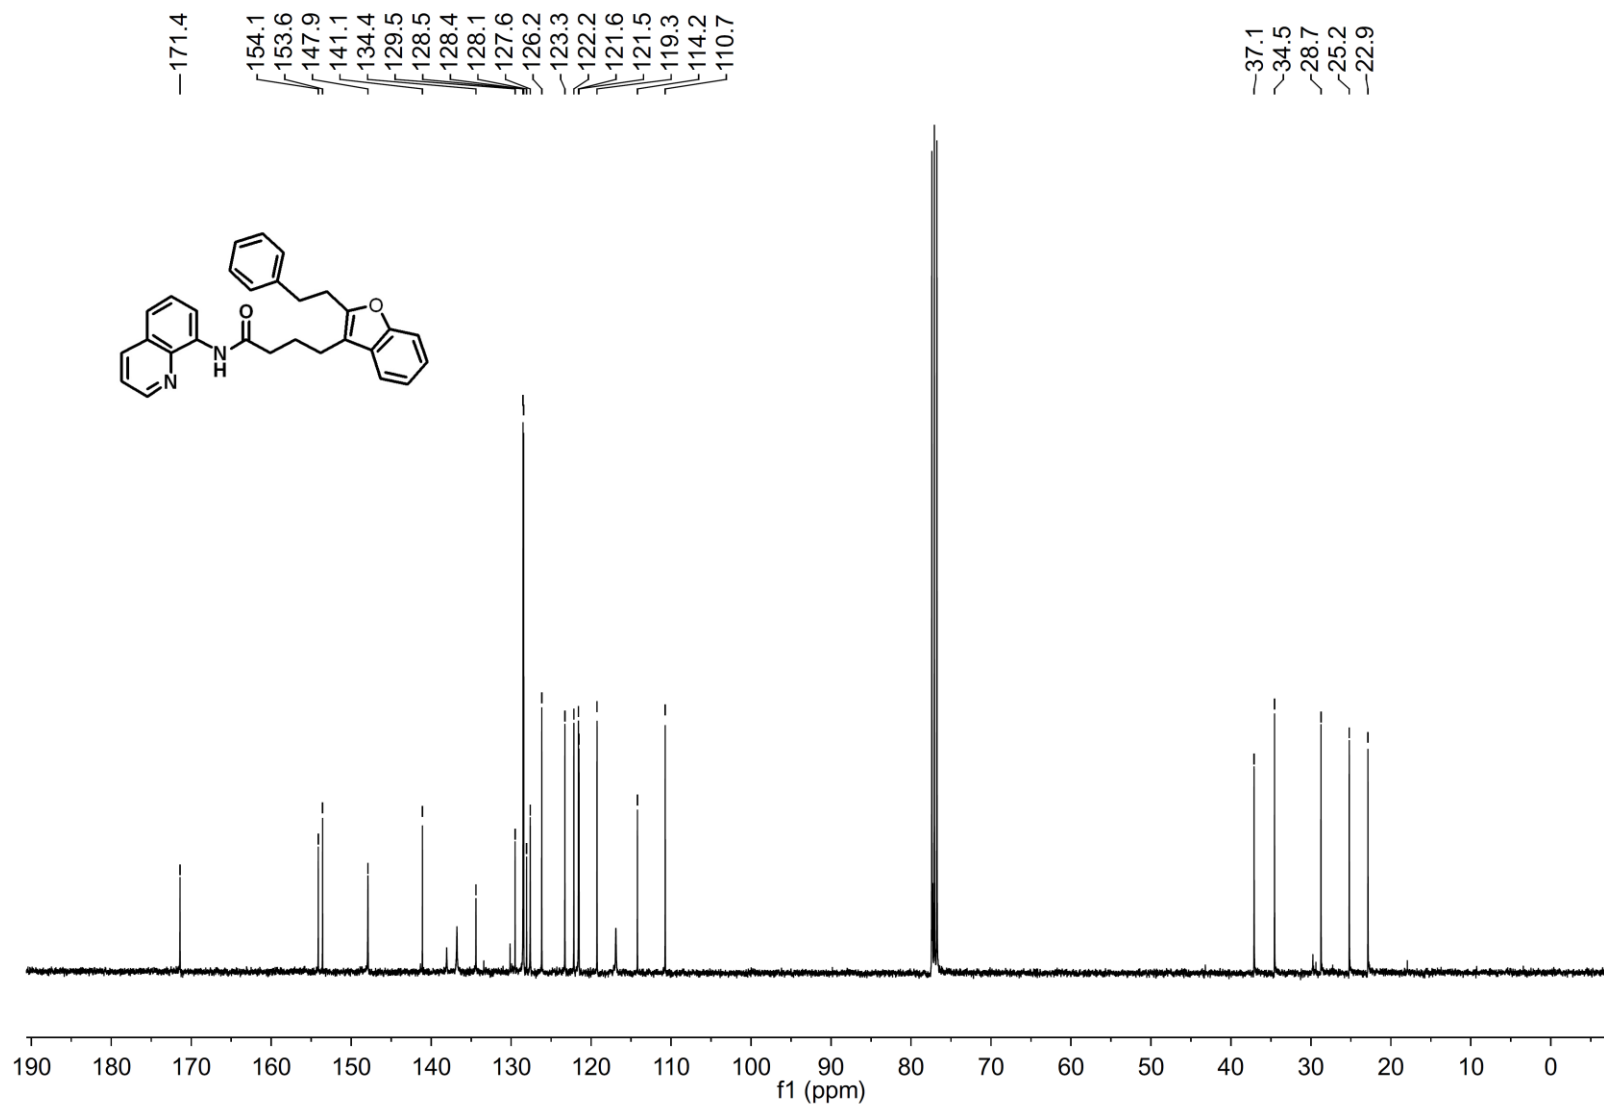

<sup>13</sup>C NMR Spectrum of Compound 3k

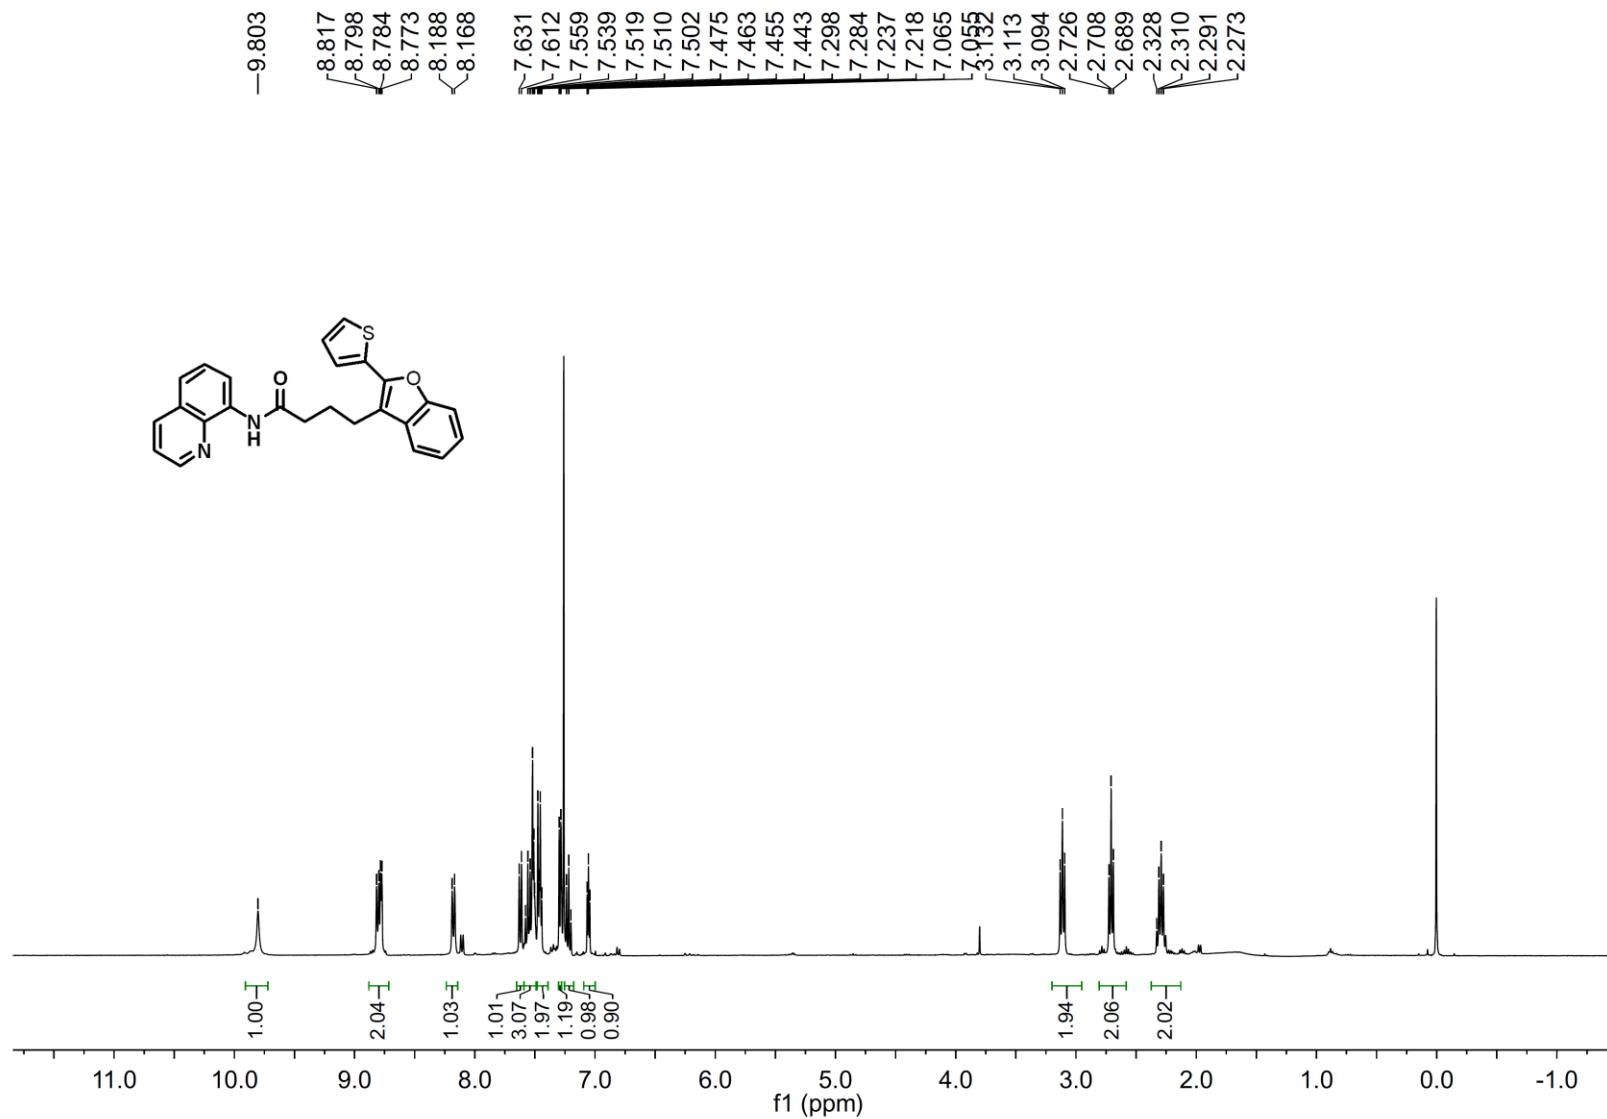

**<sup>1</sup>H NMR Spectrum of Compound 31**

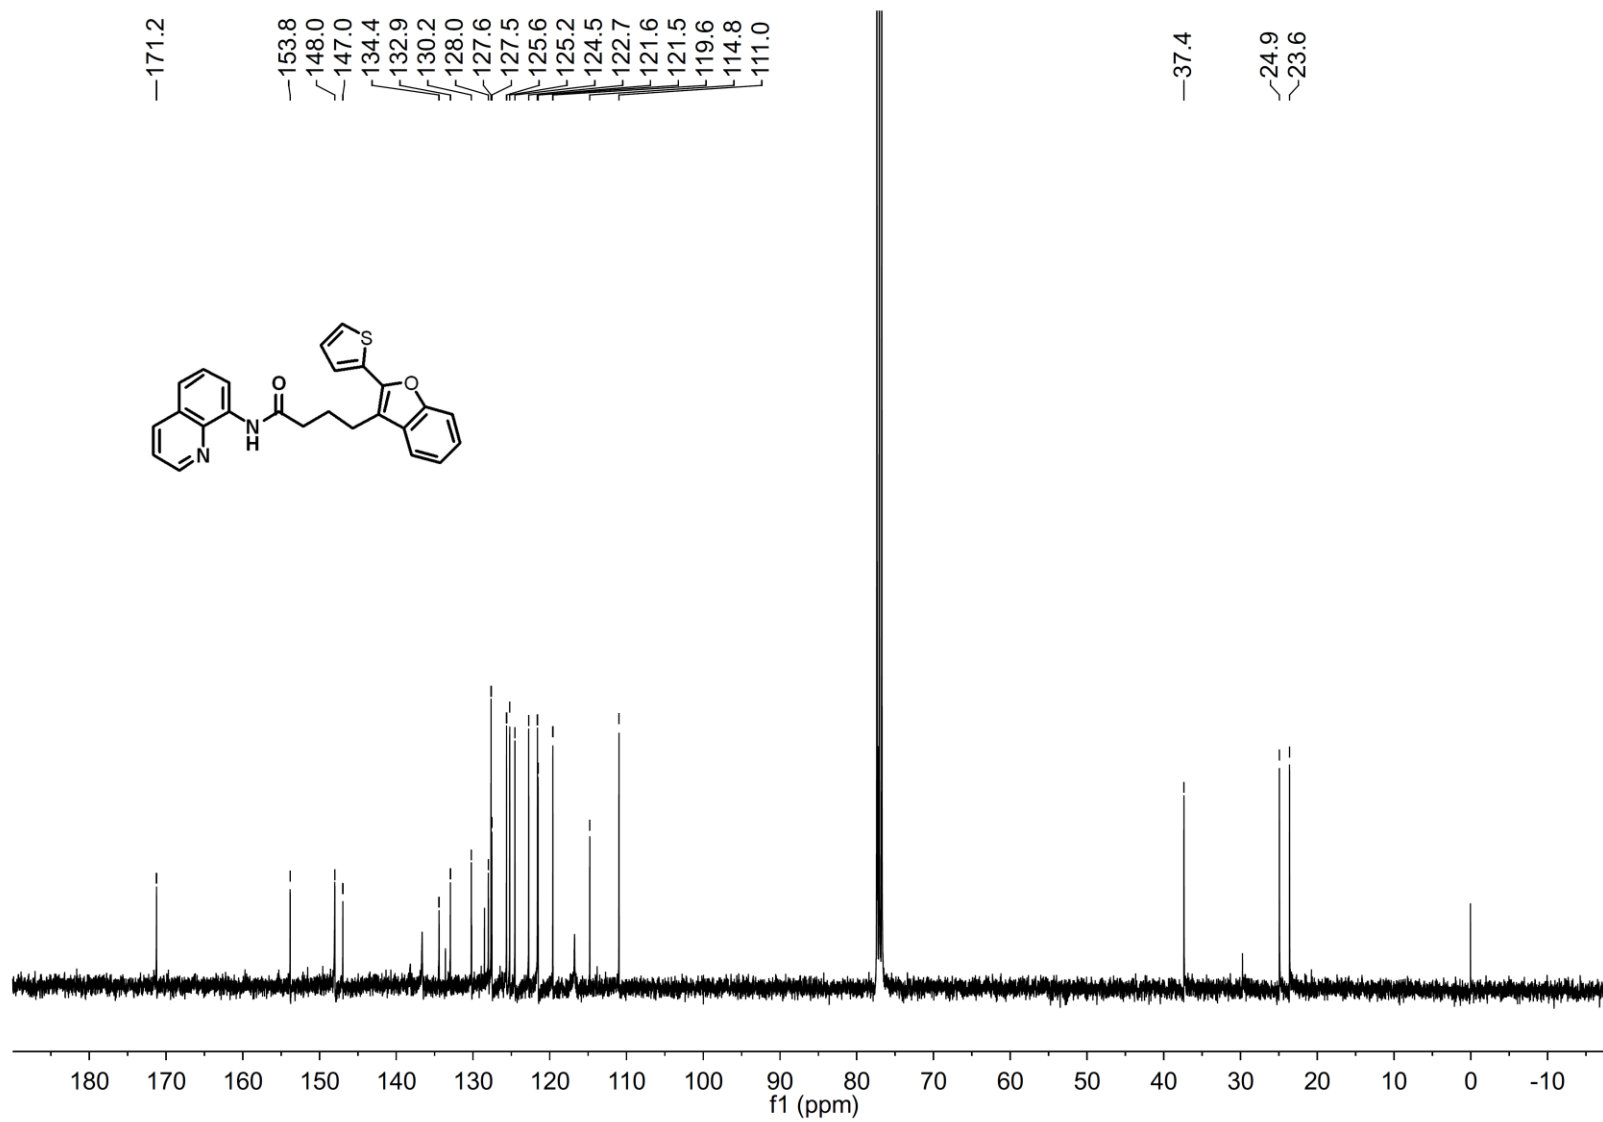

<sup>13</sup>C NMR Spectrum of Compound 31

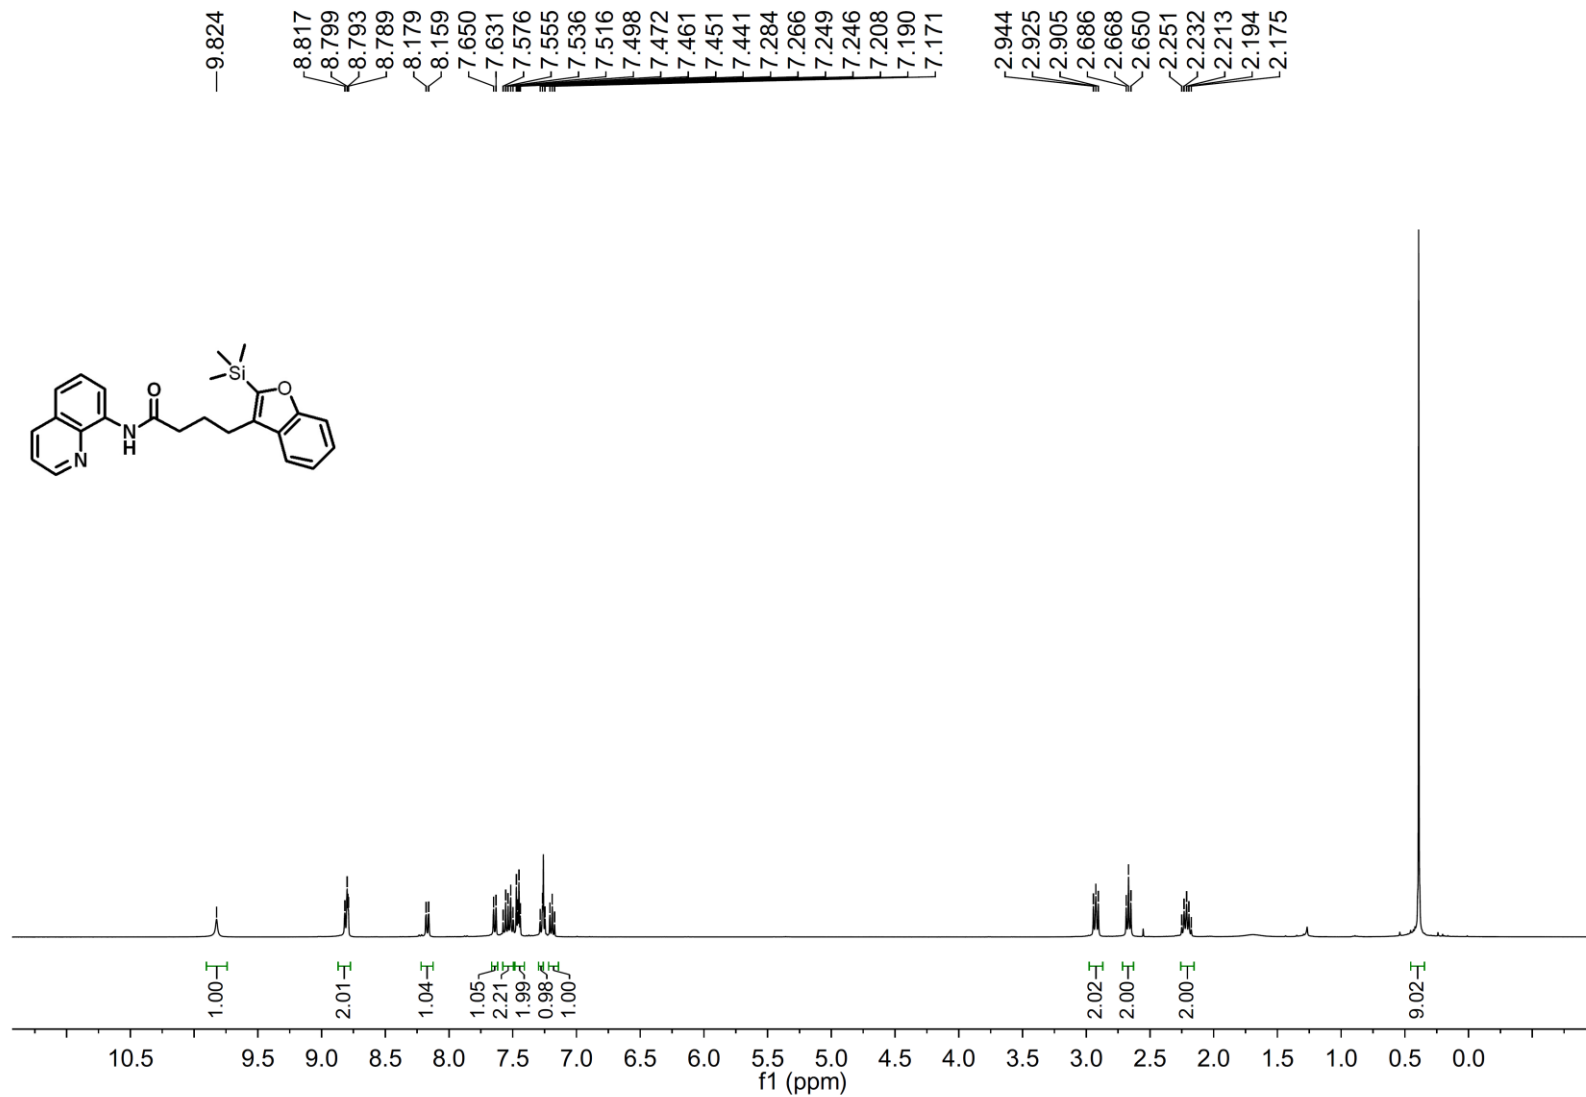

<sup>1</sup>H NMR Spectrum of Compound 3m

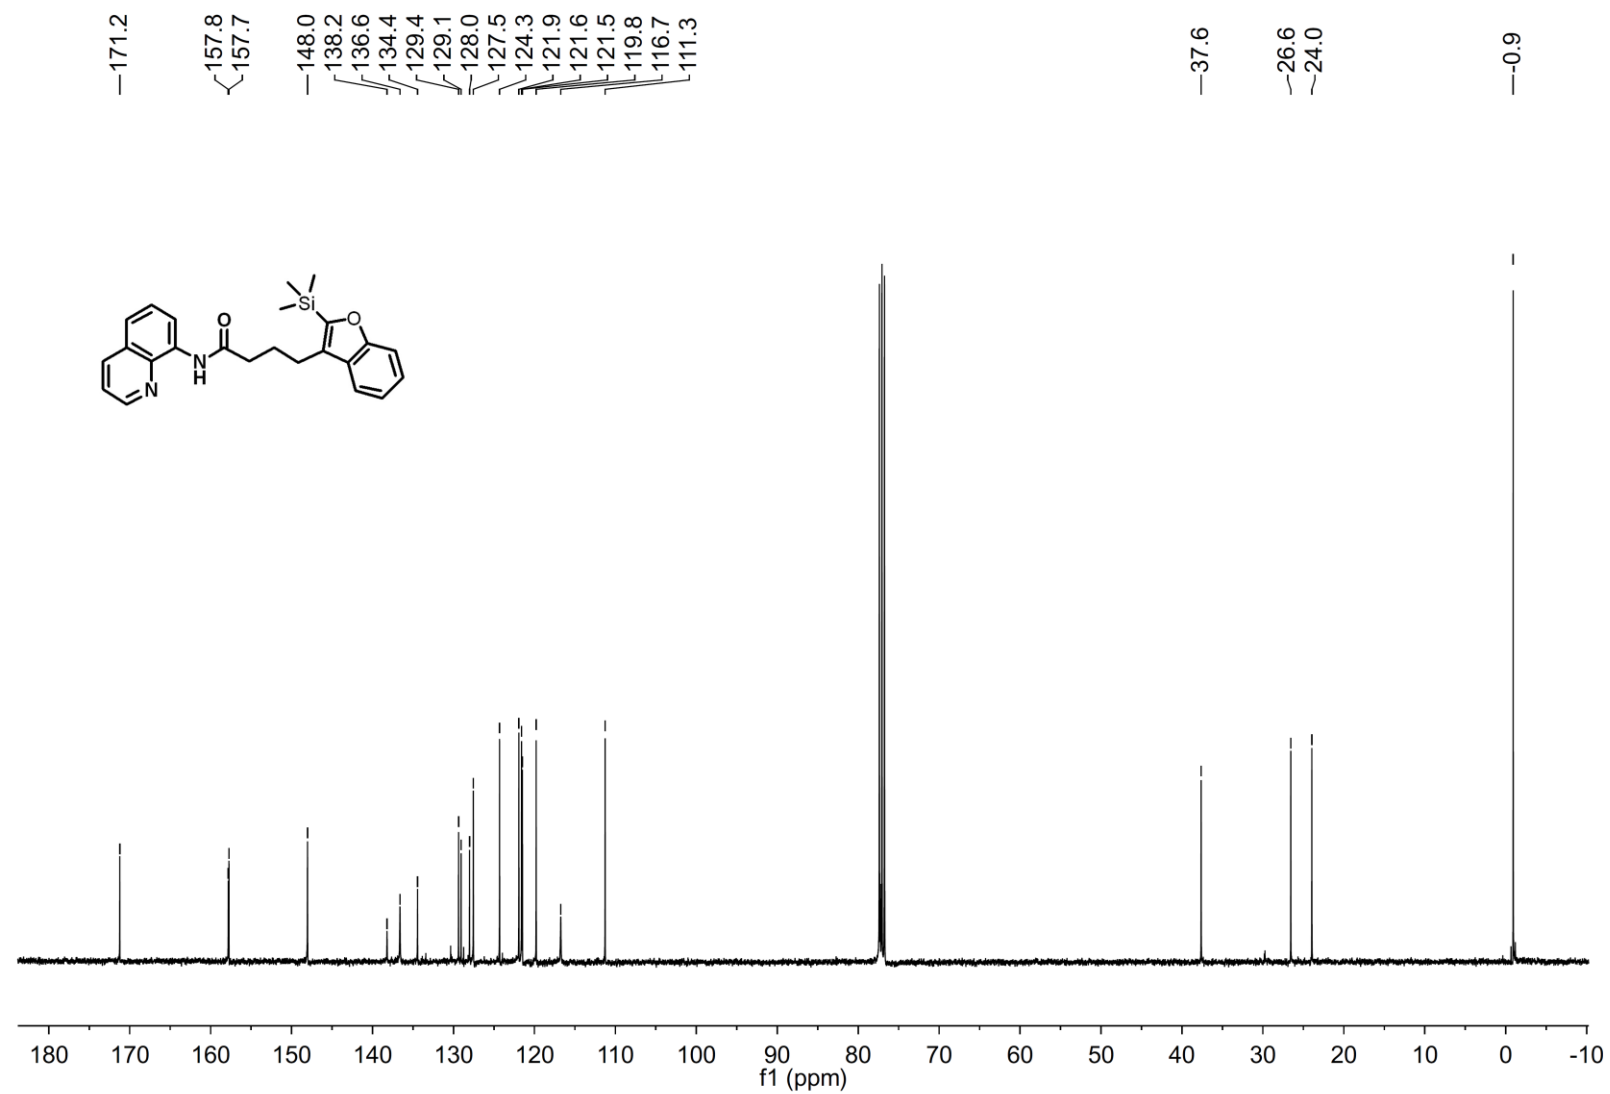

<sup>13</sup>C NMR Spectrum of Compound 3m



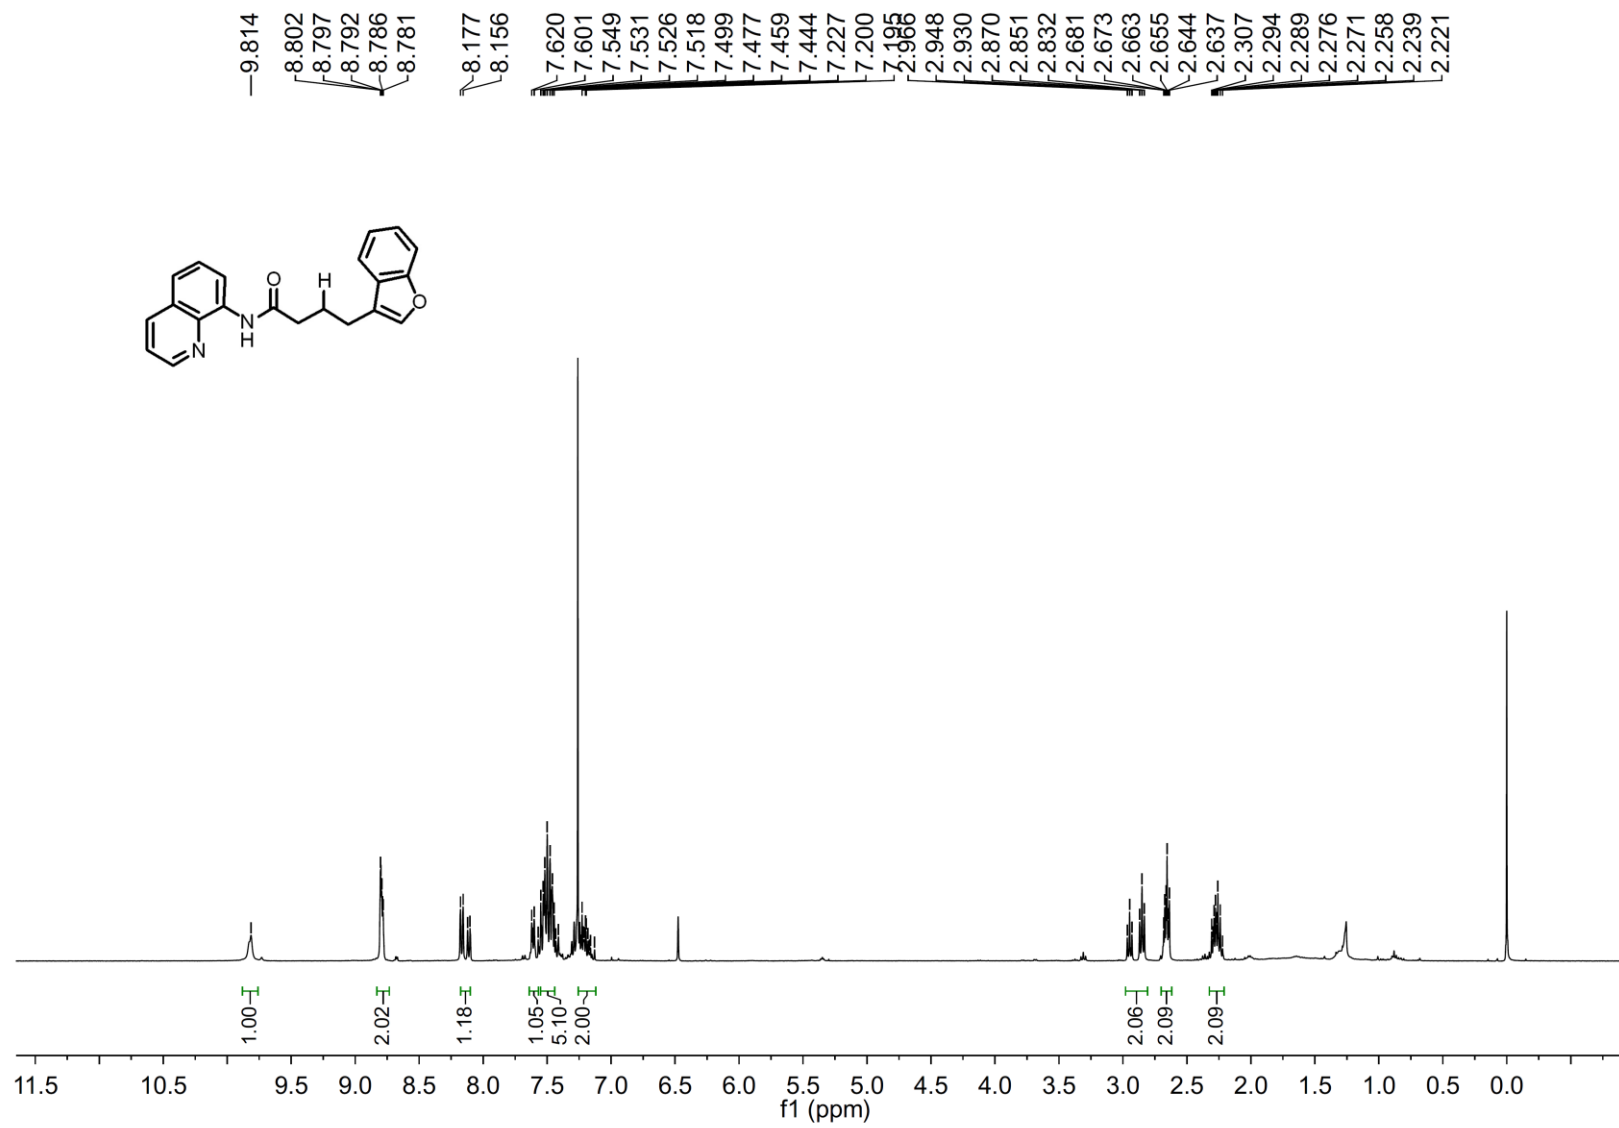

<sup>1</sup>H NMR Spectrum of Compound 3n

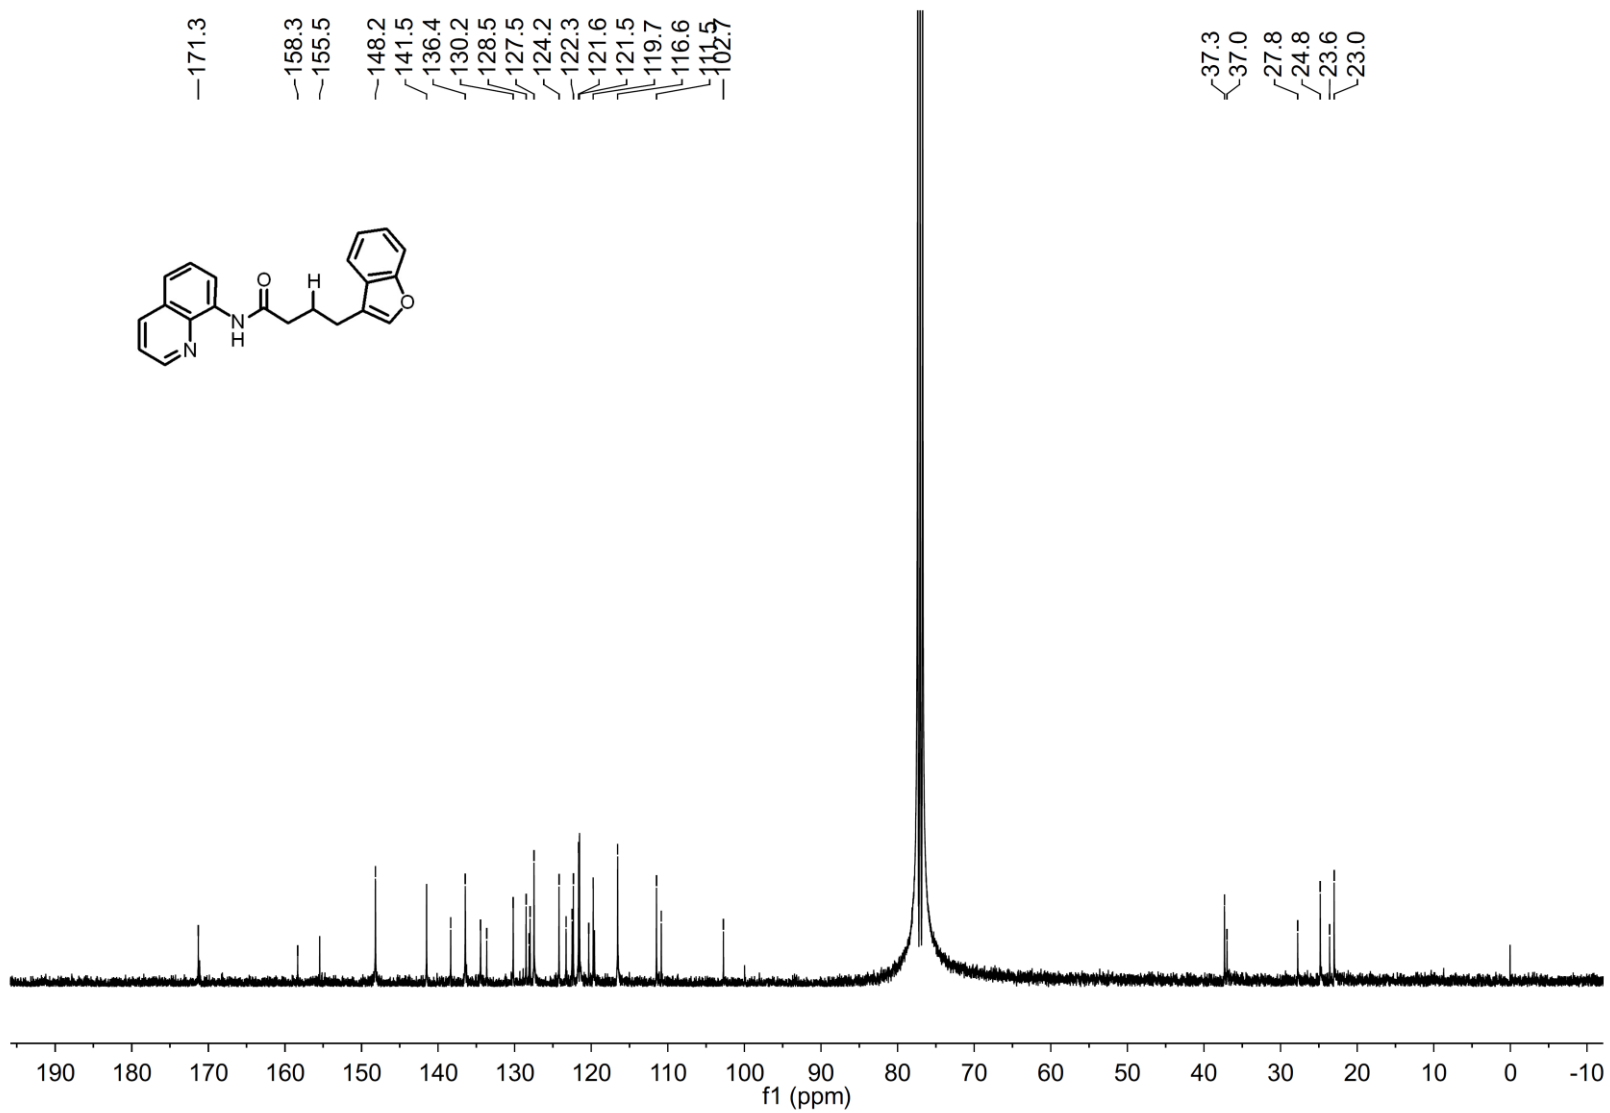

<sup>13</sup>C NMR Spectrum of Compound 3n

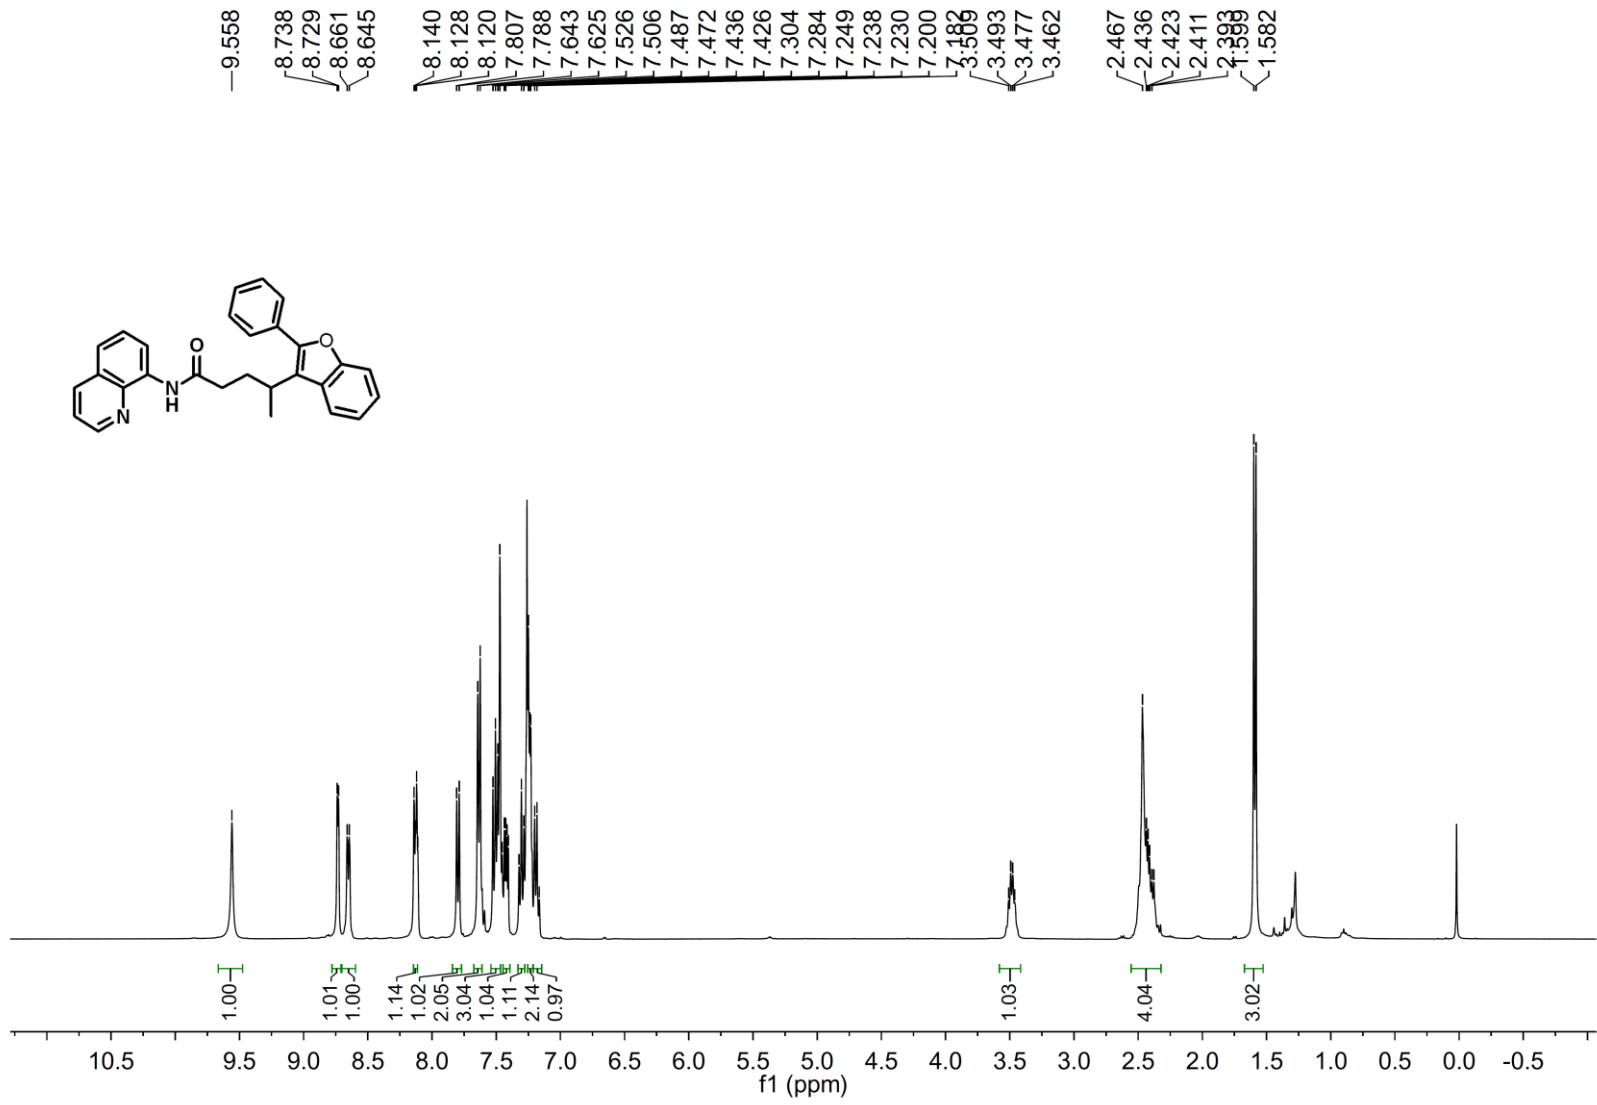

<sup>1</sup>H NMR Spectrum of Compound 3o

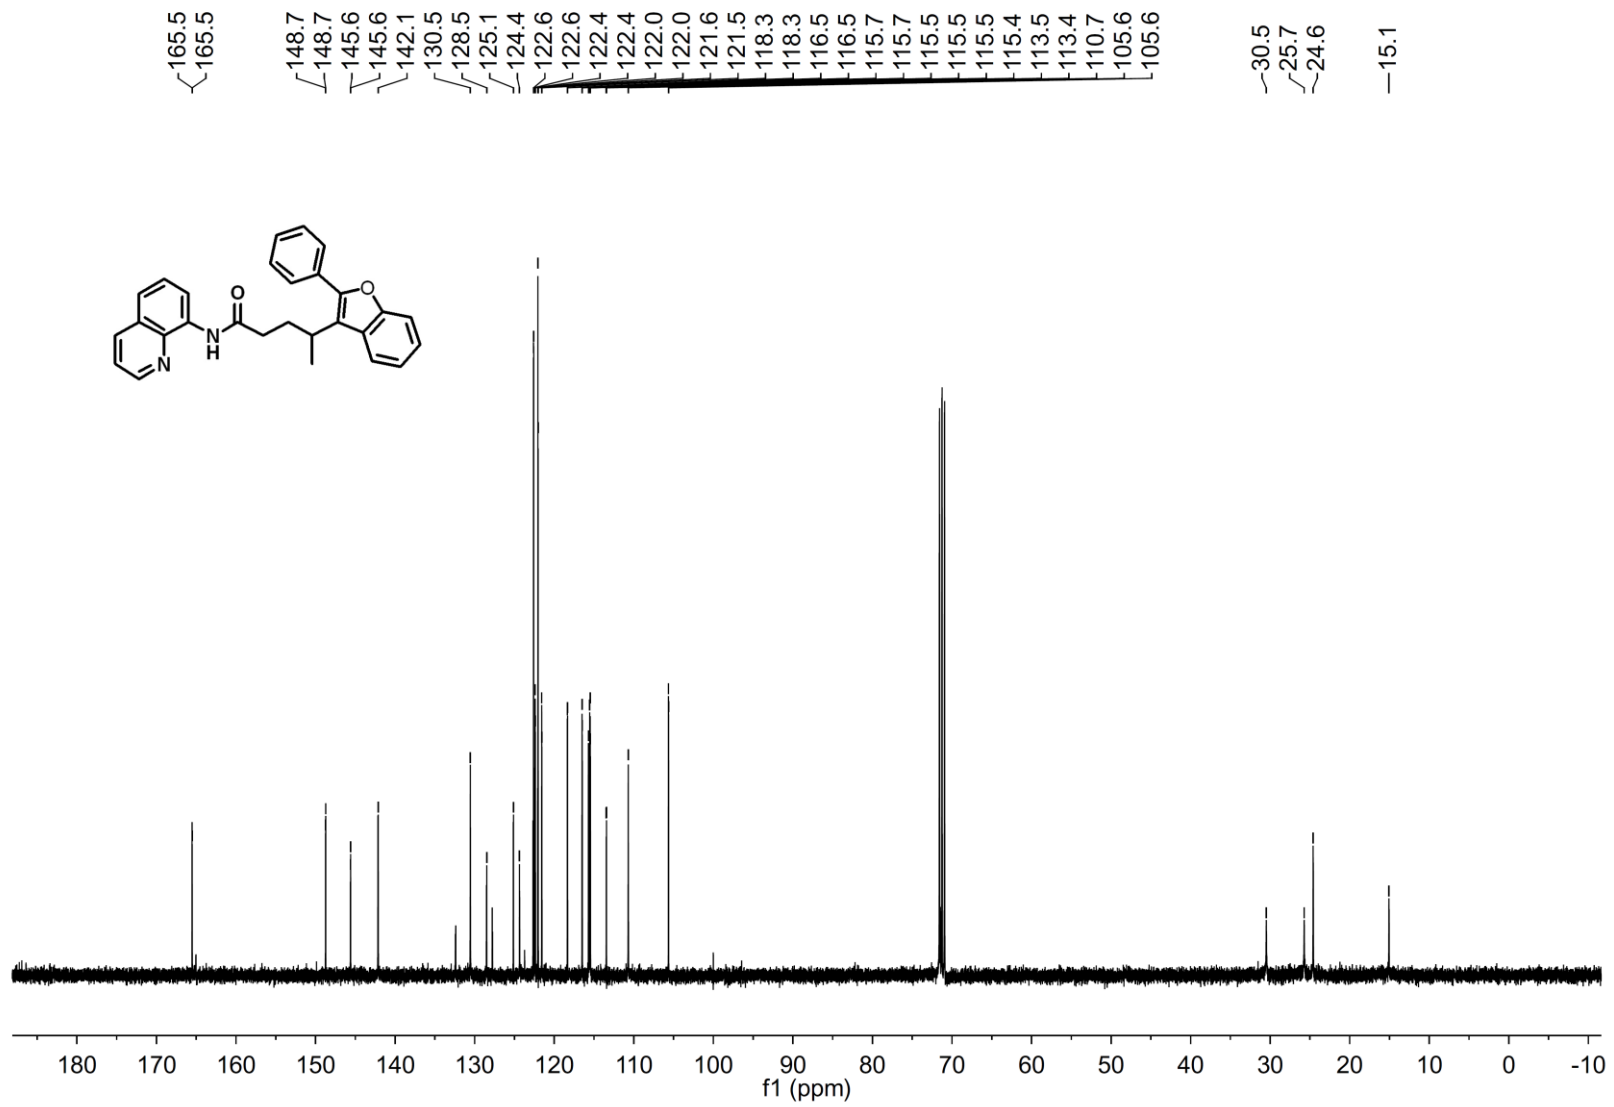

<sup>13</sup>C NMR Spectrum of Compound 3o

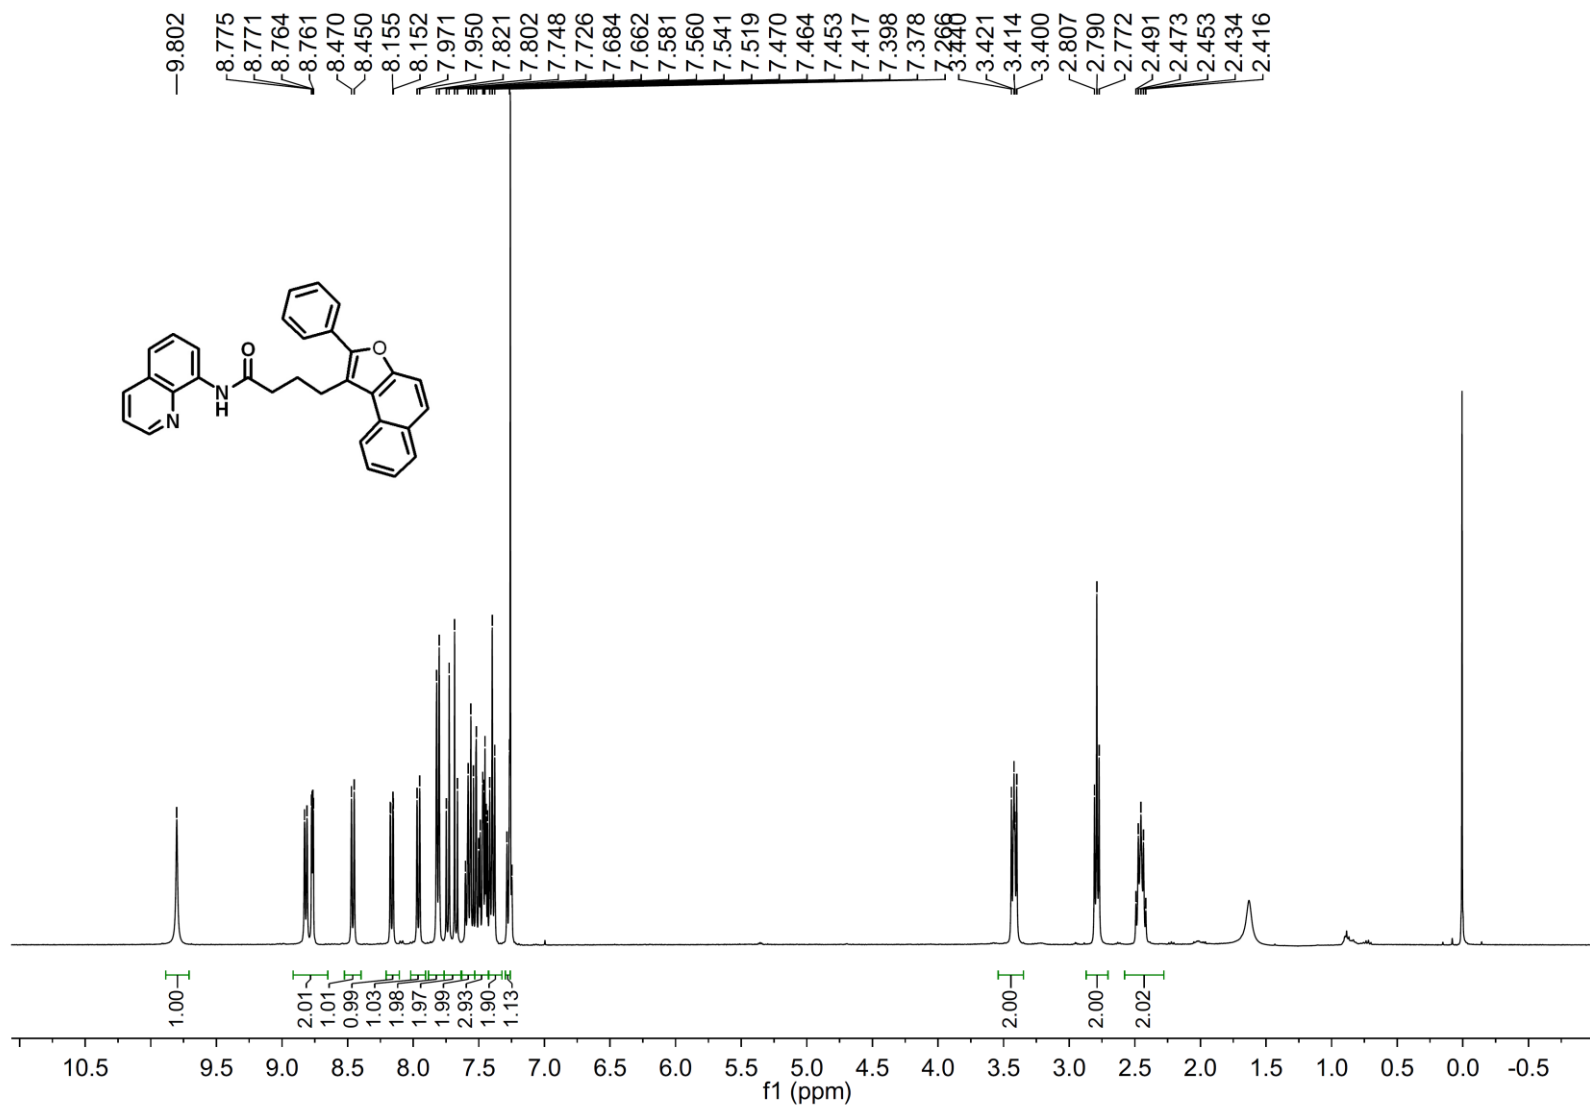

<sup>1</sup>H NMR Spectrum of Compound 3p

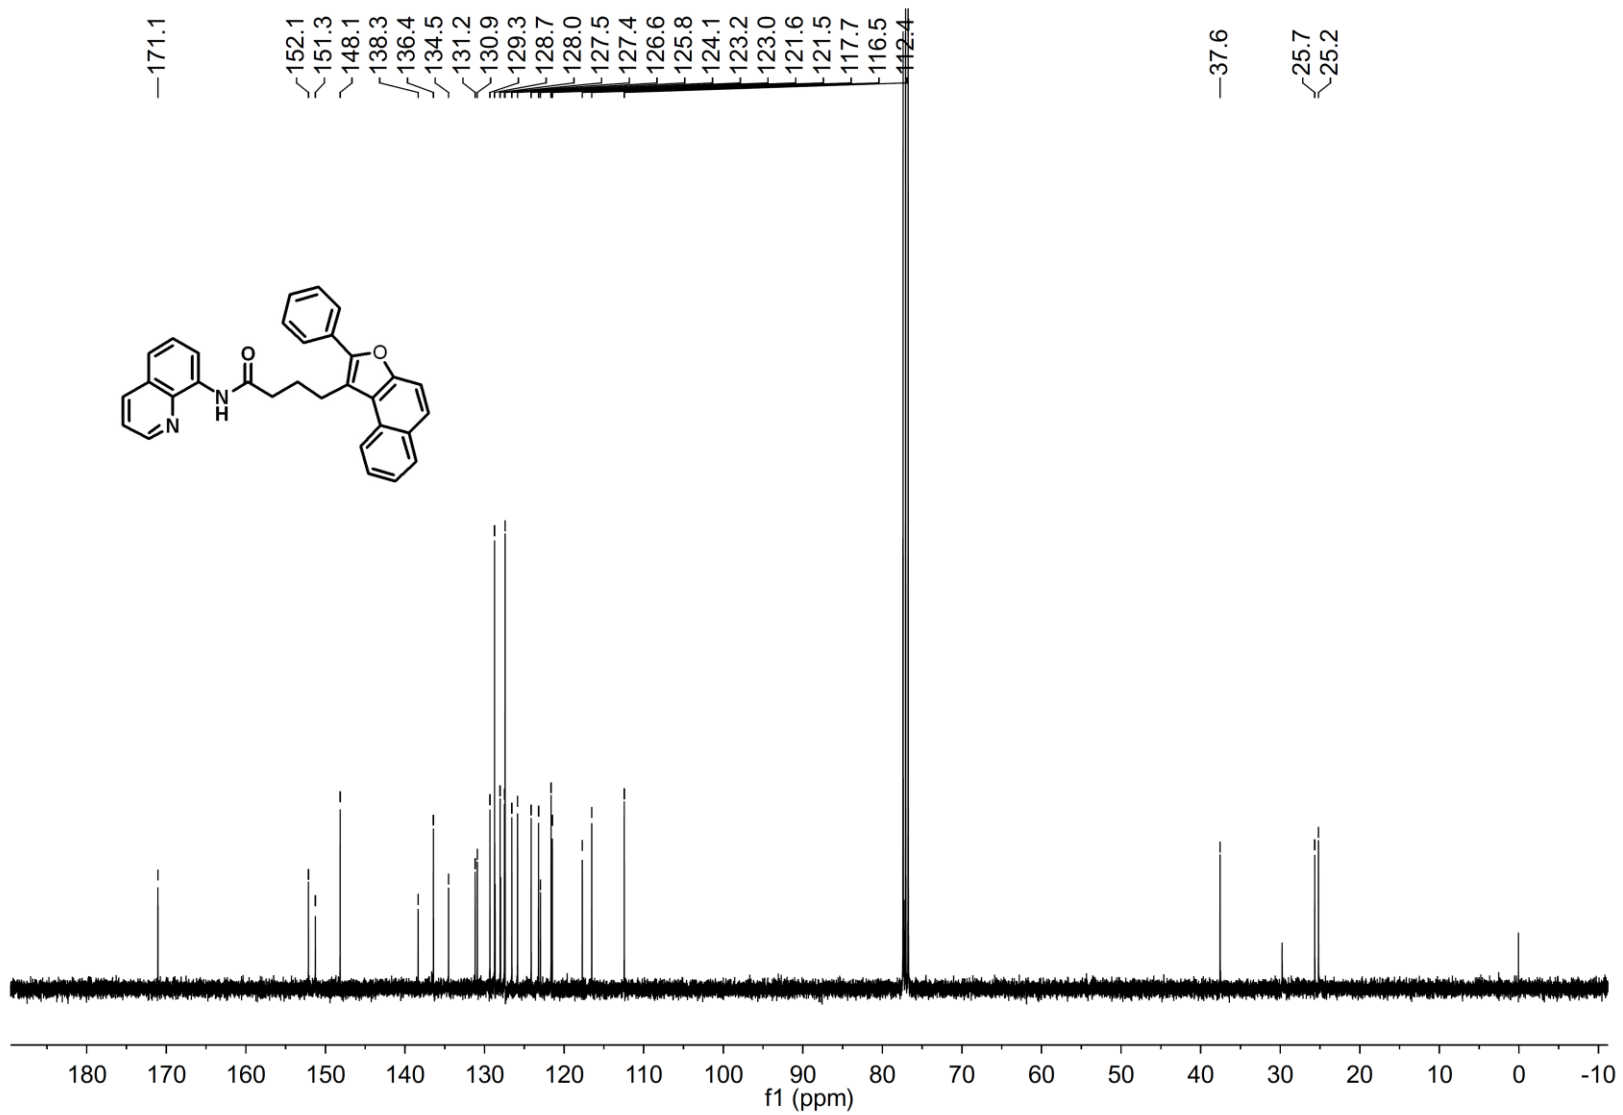

<sup>13</sup>C NMR Spectrum of Compound 3p

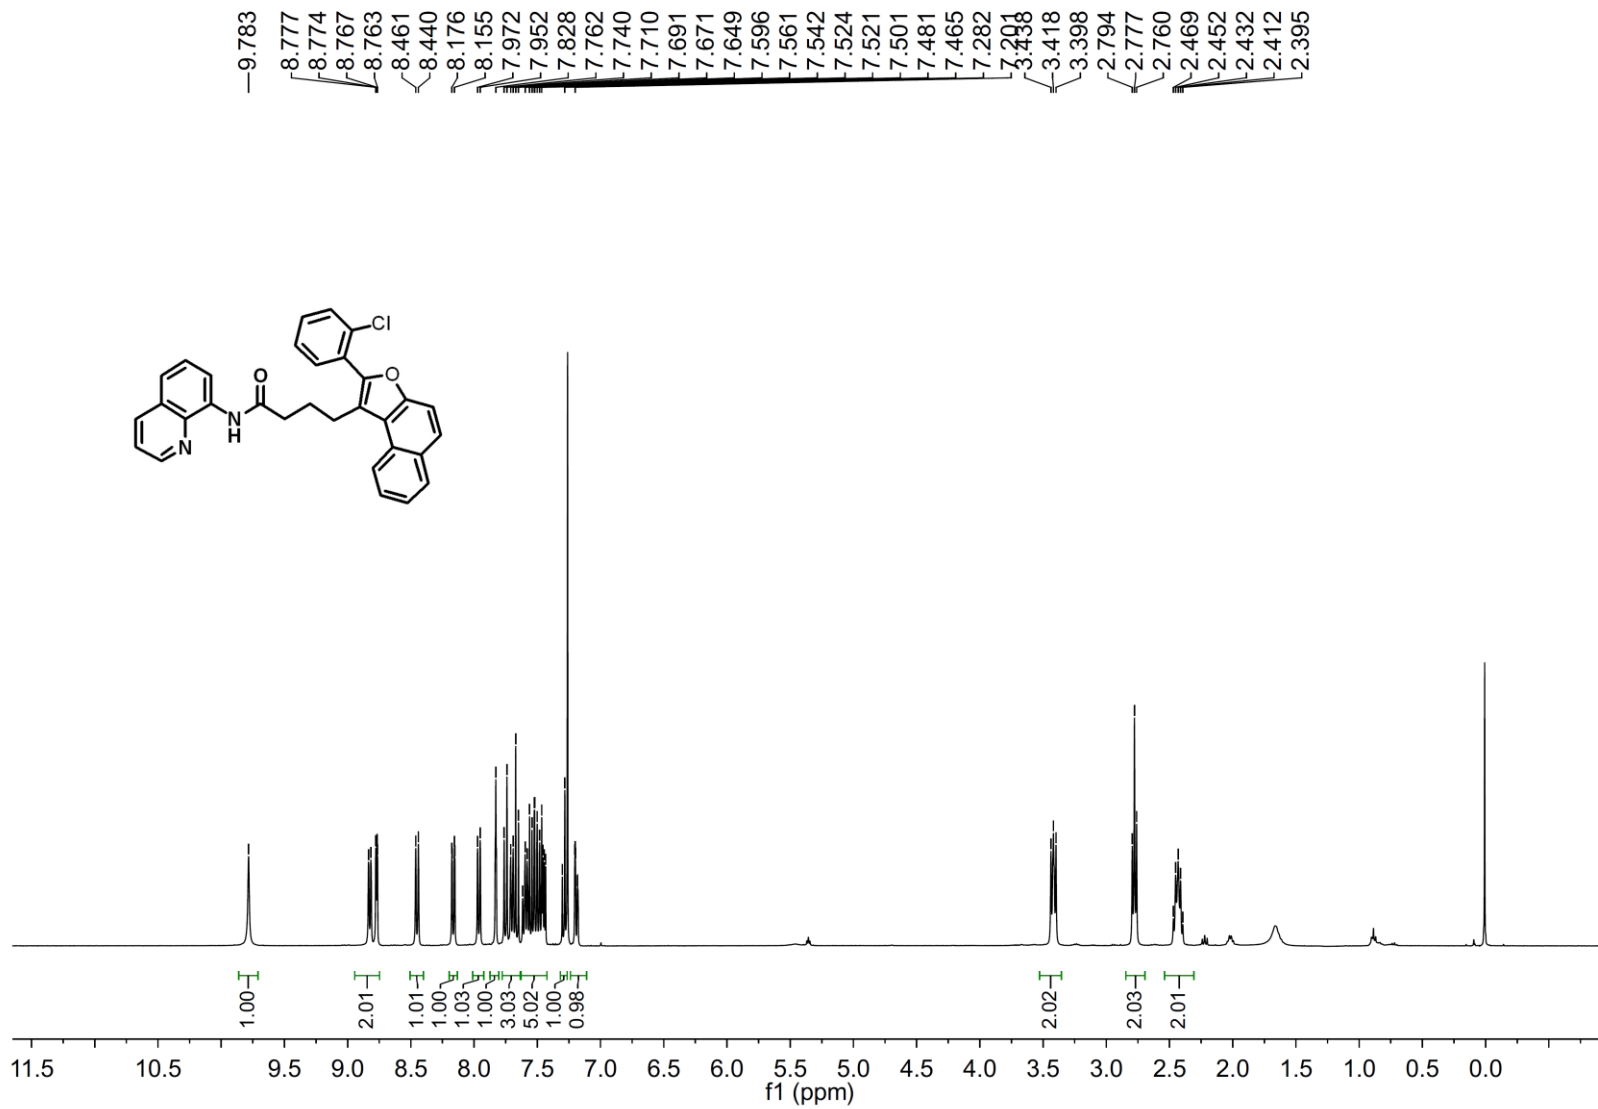

<sup>1</sup>H NMR Spectrum of Compound 3q

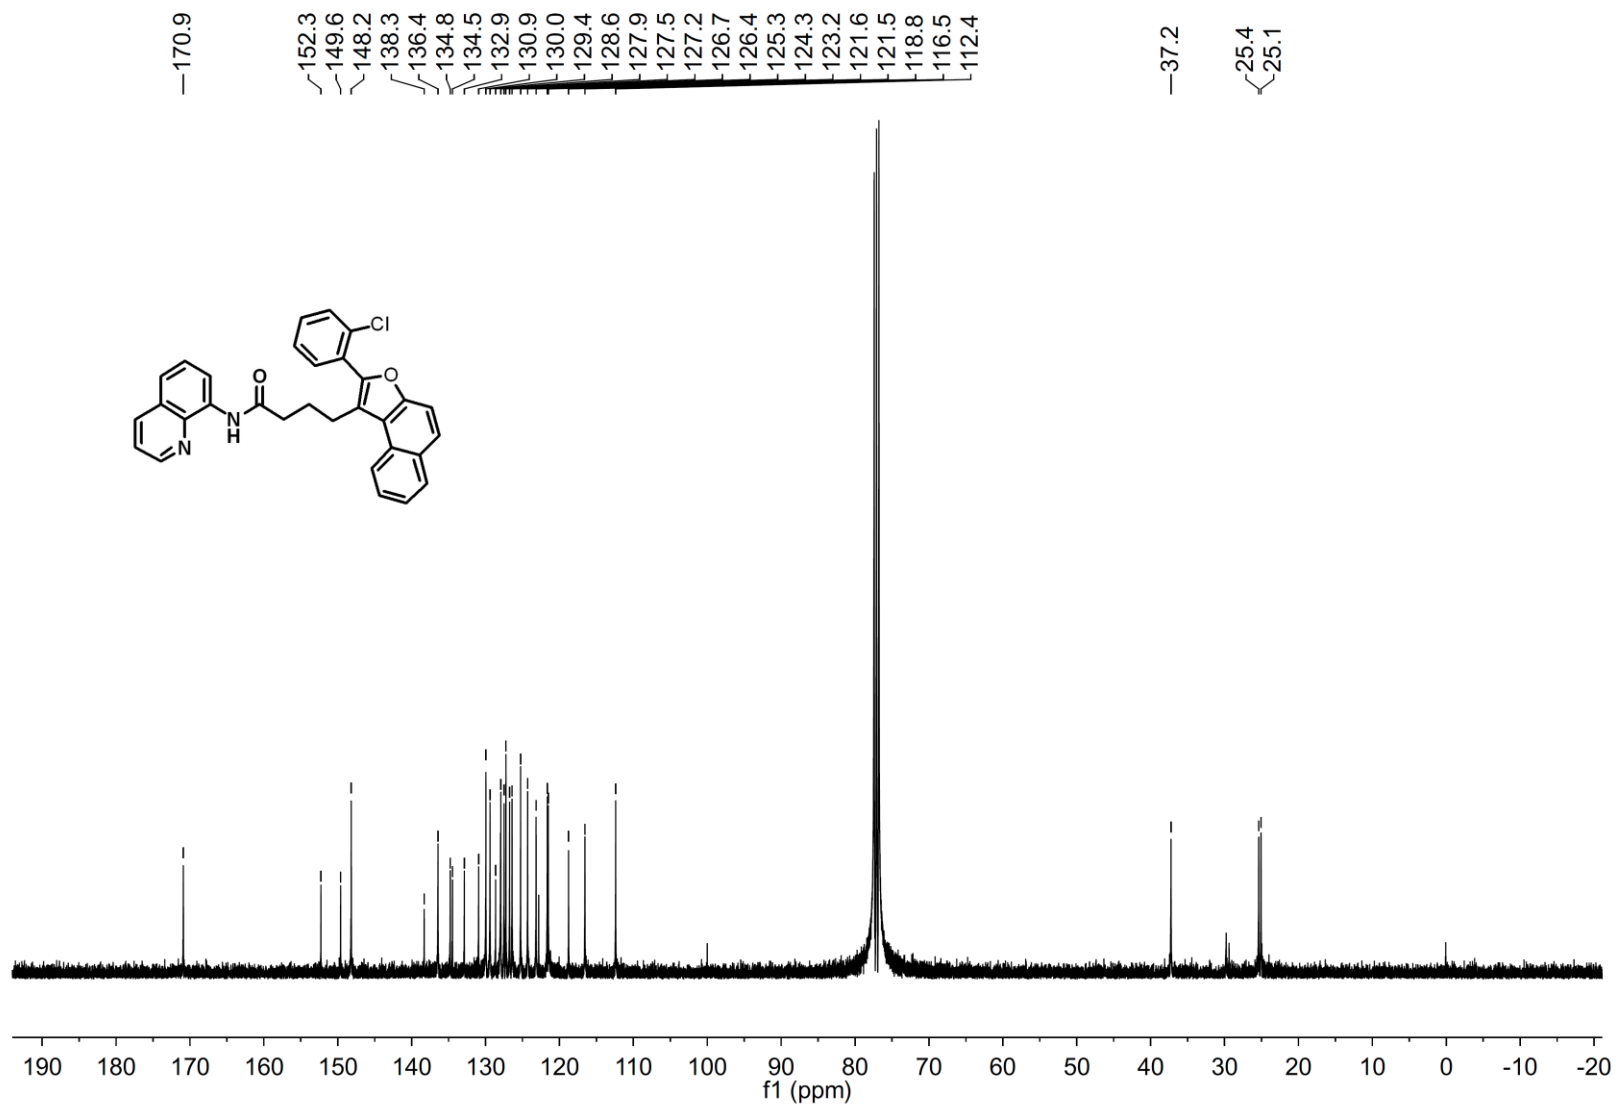

<sup>13</sup>C NMR Spectrum of Compound 3q



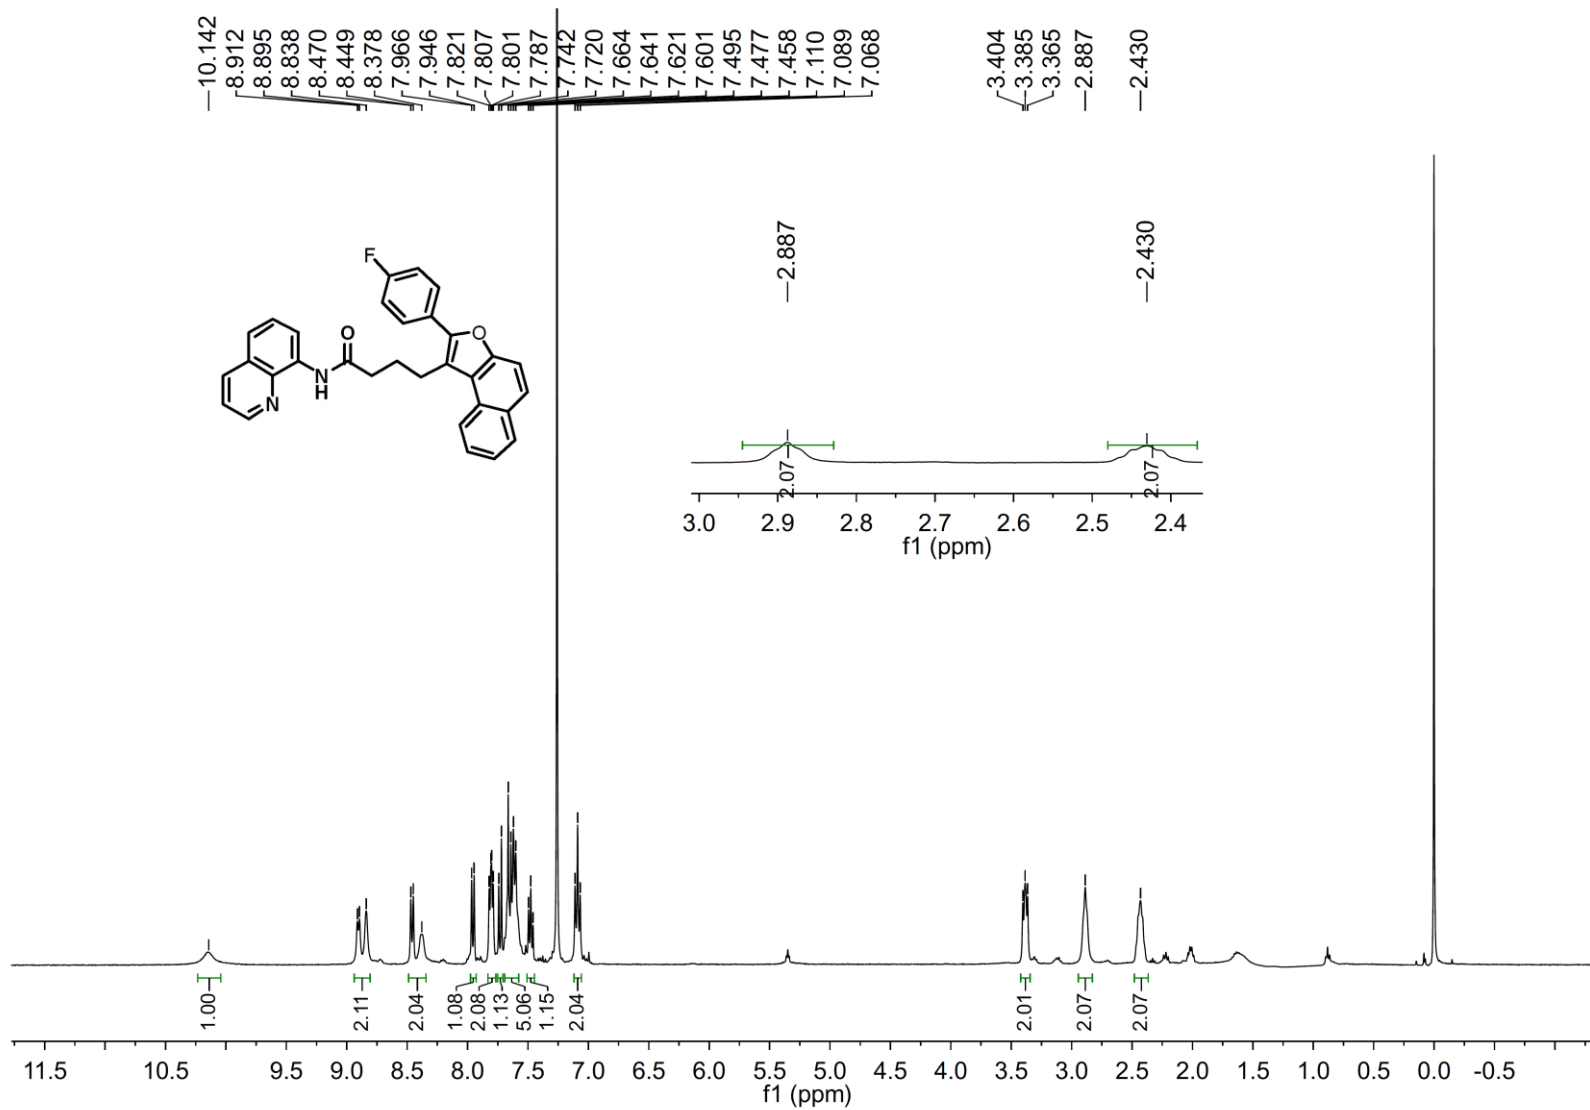

**<sup>1</sup>H NMR Spectrum of Compound 3r**

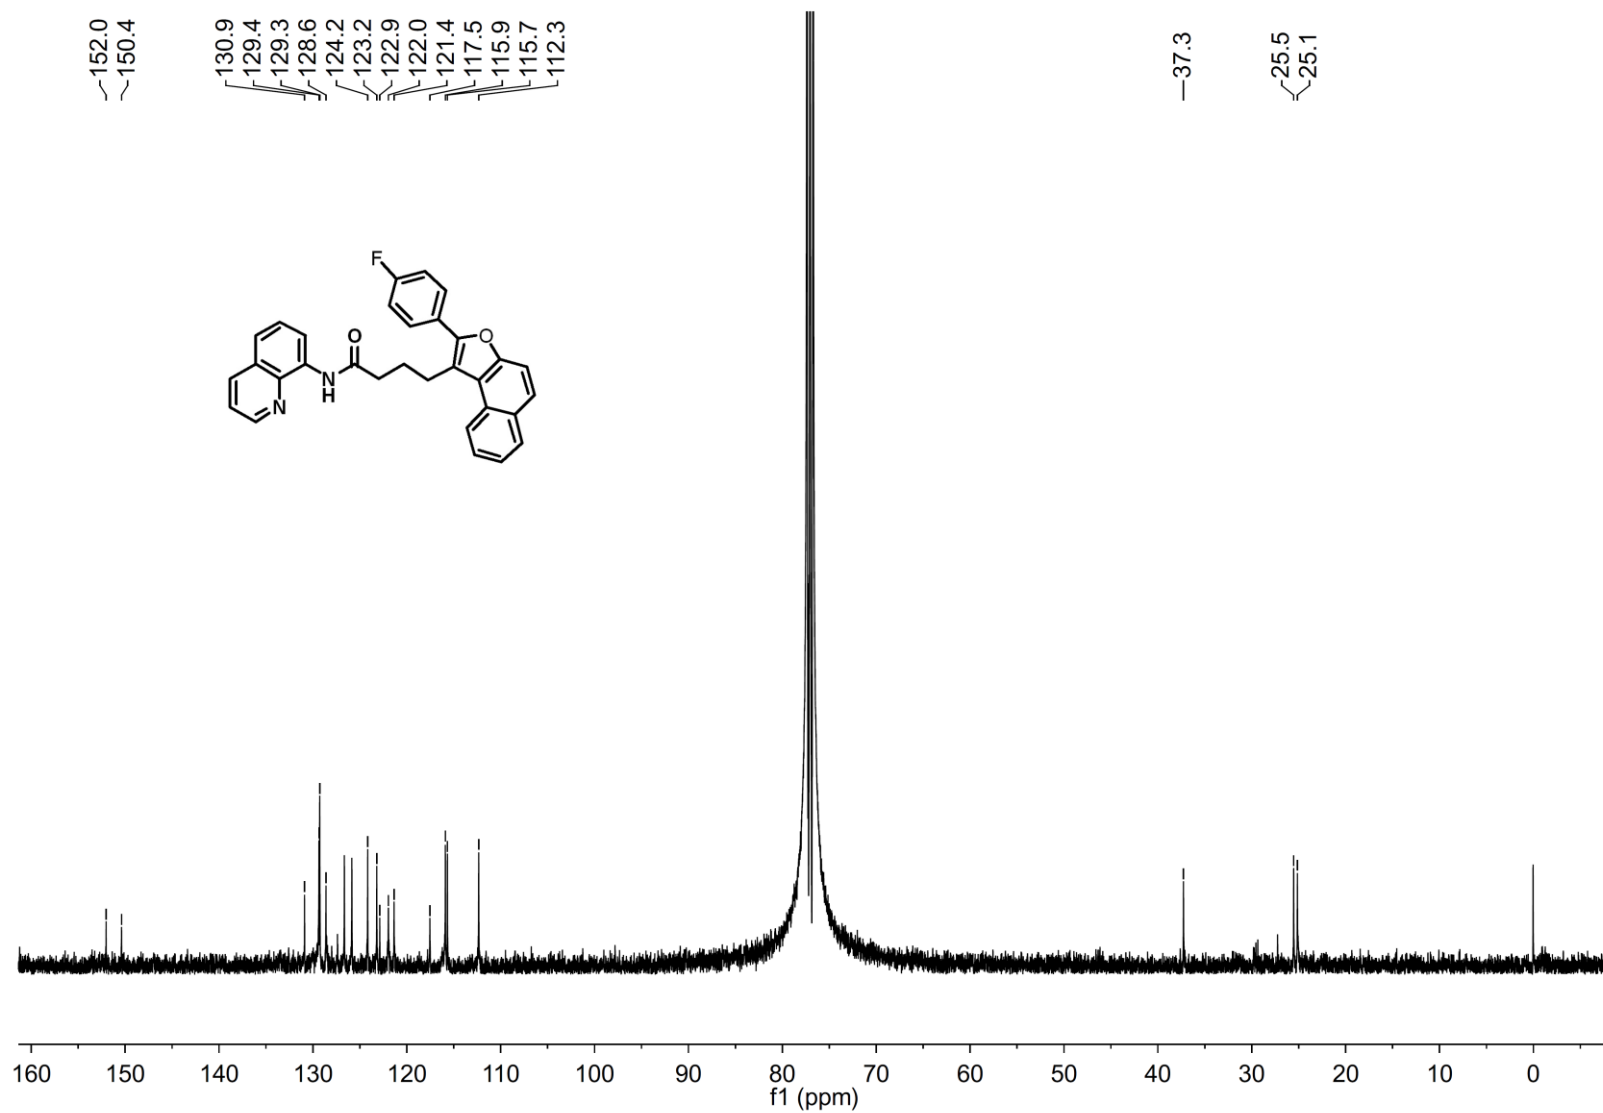

<sup>13</sup>C NMR Spectrum of Compound 3r

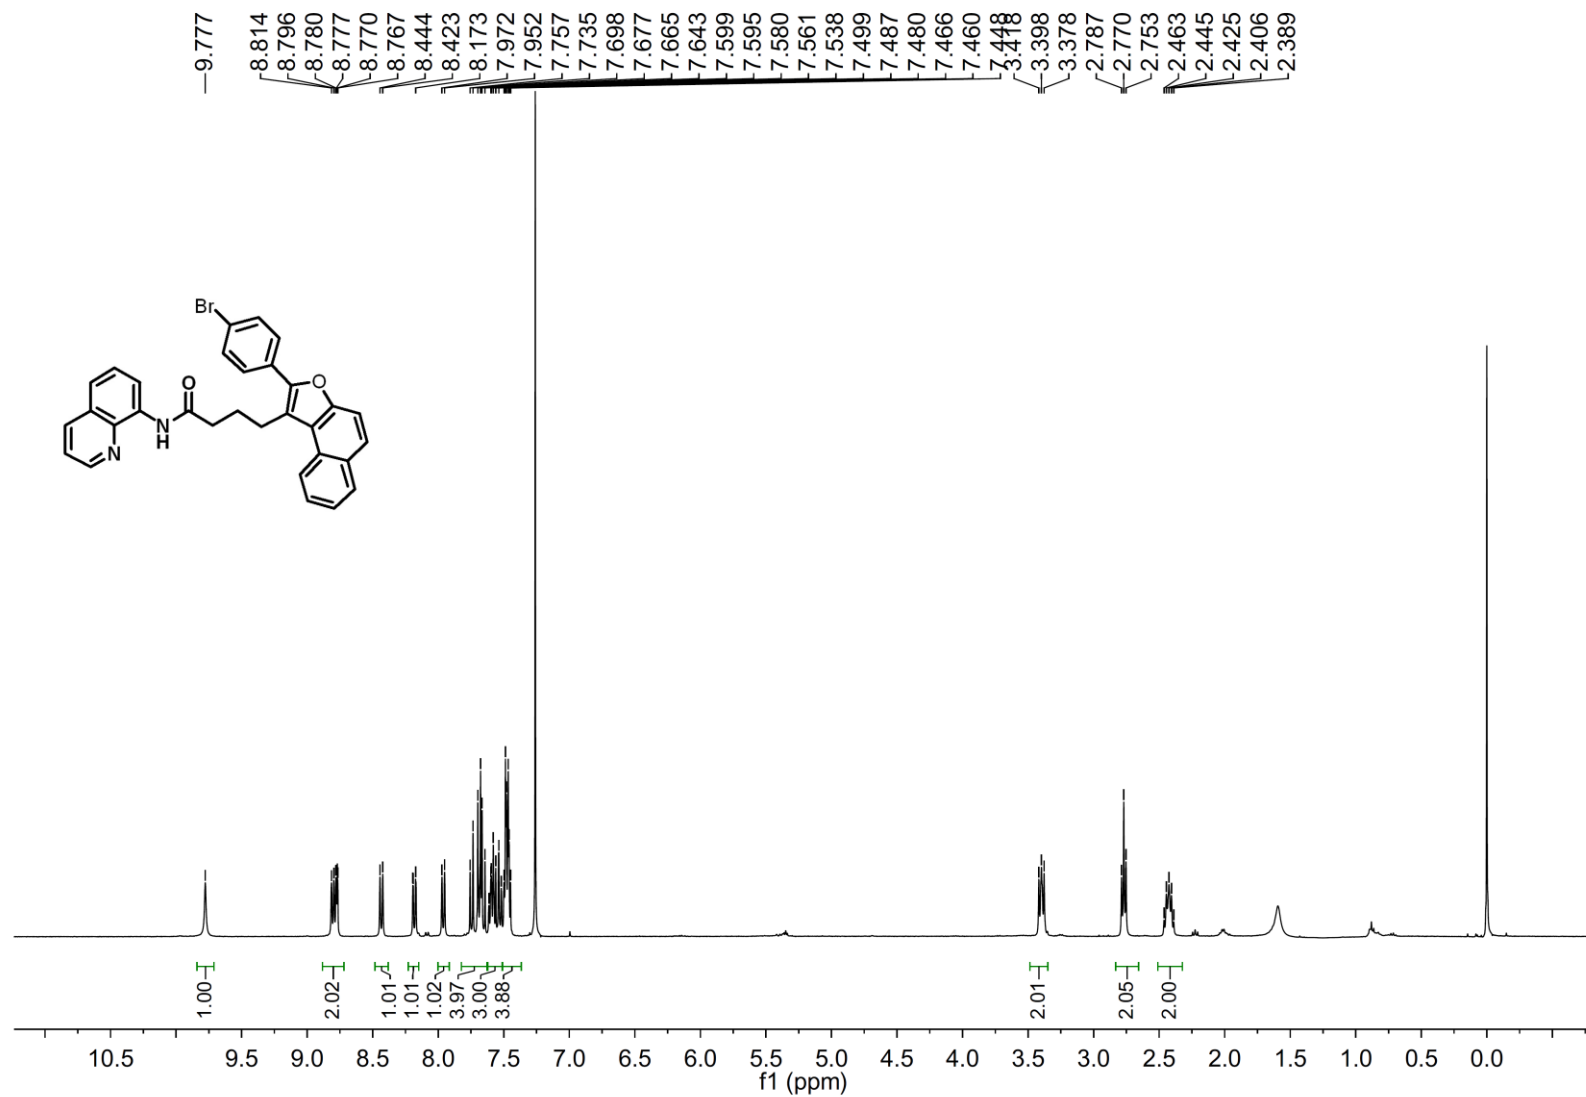

<sup>1</sup>H NMR Spectrum of Compound 3s

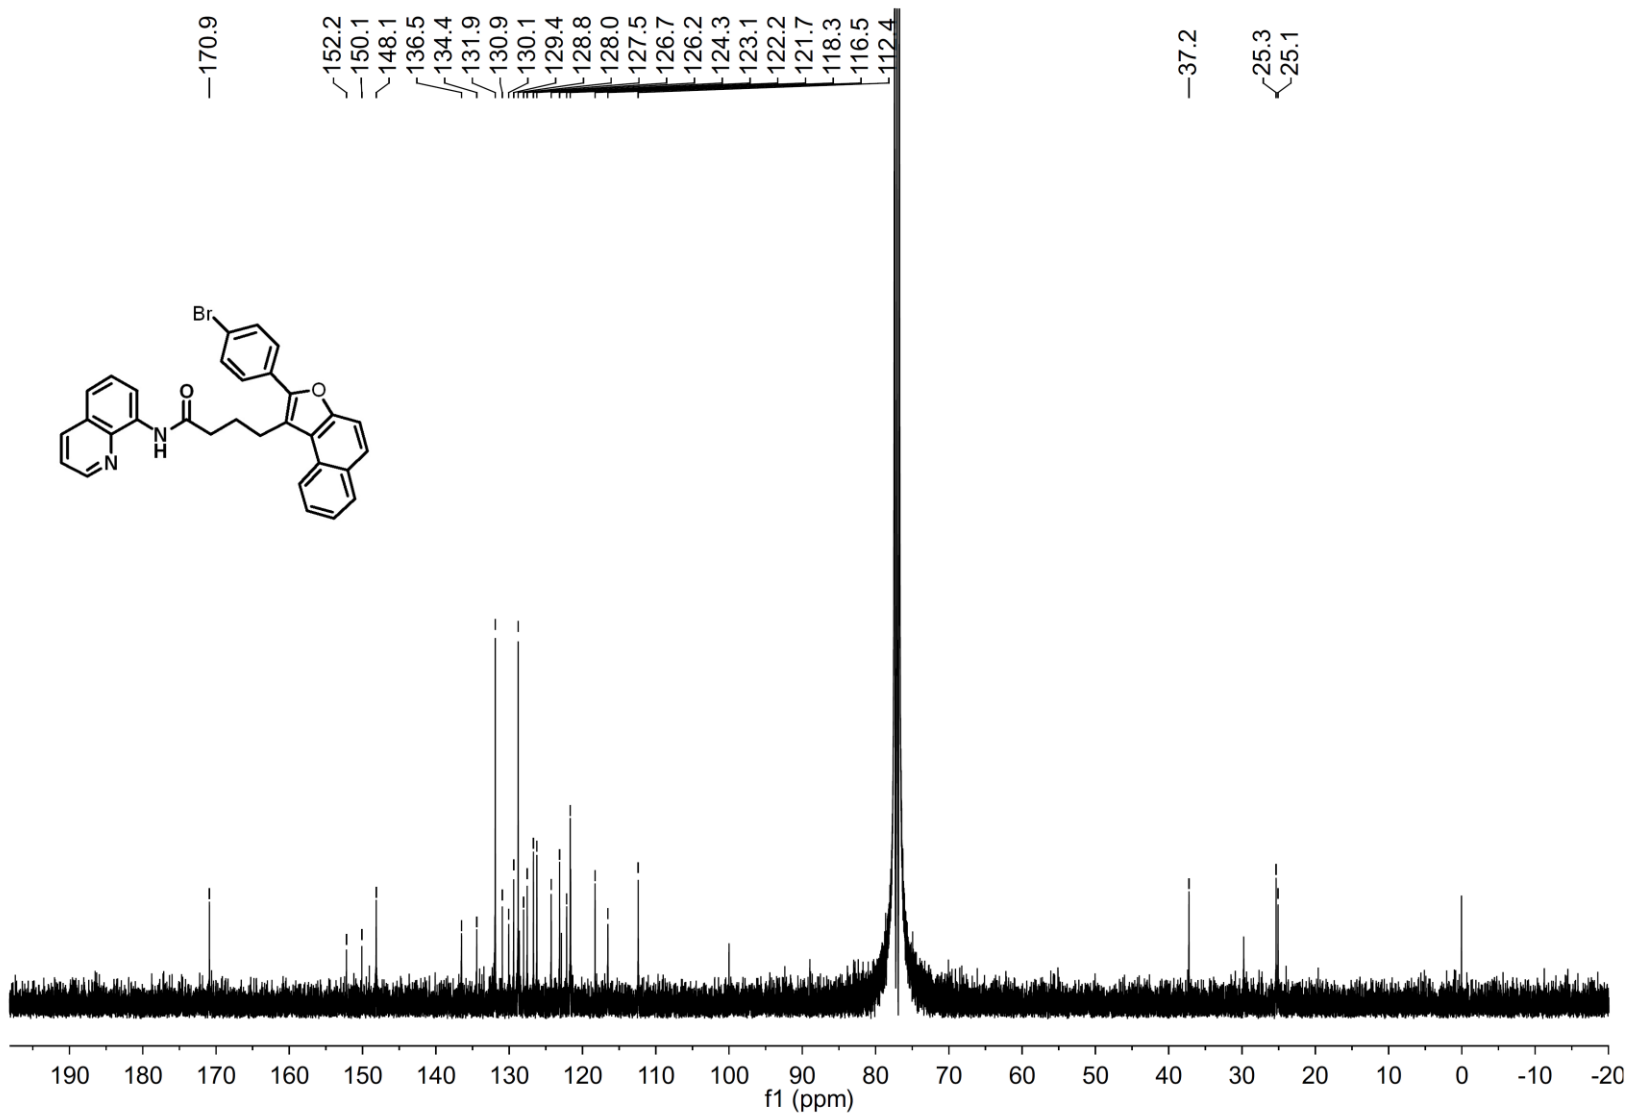

<sup>13</sup>C NMR Spectrum of Compound 3s

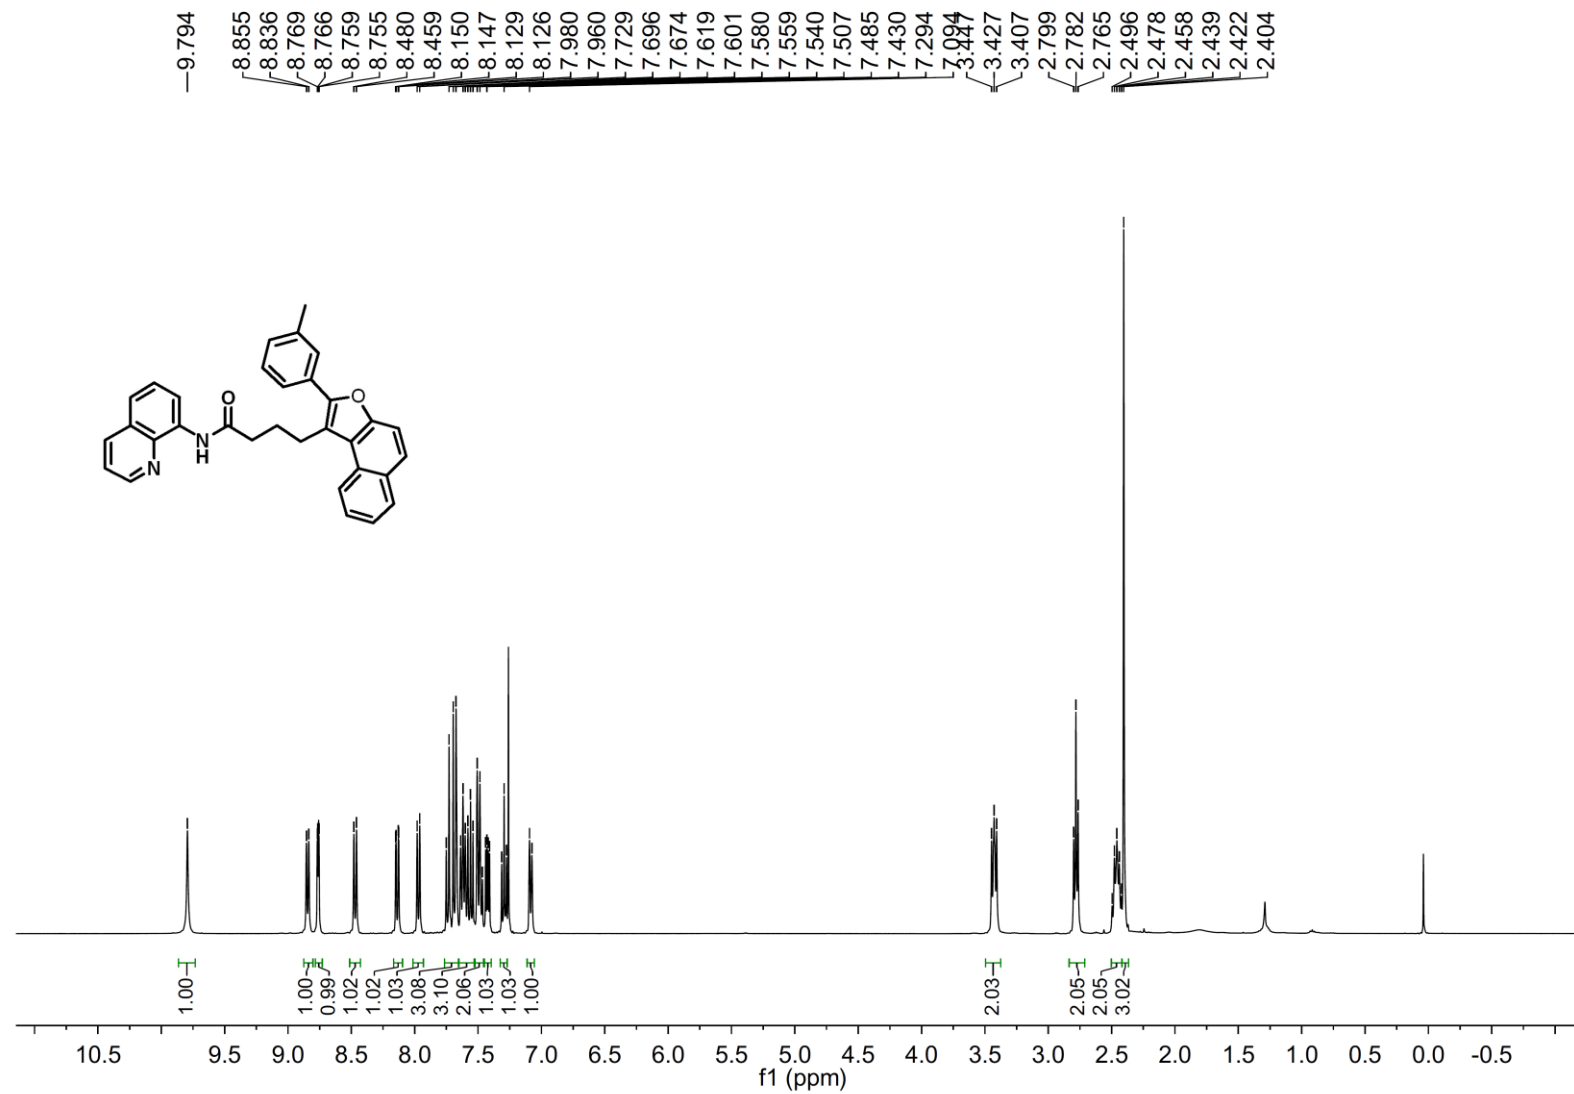

<sup>1</sup>H NMR Spectrum of Compound 3t

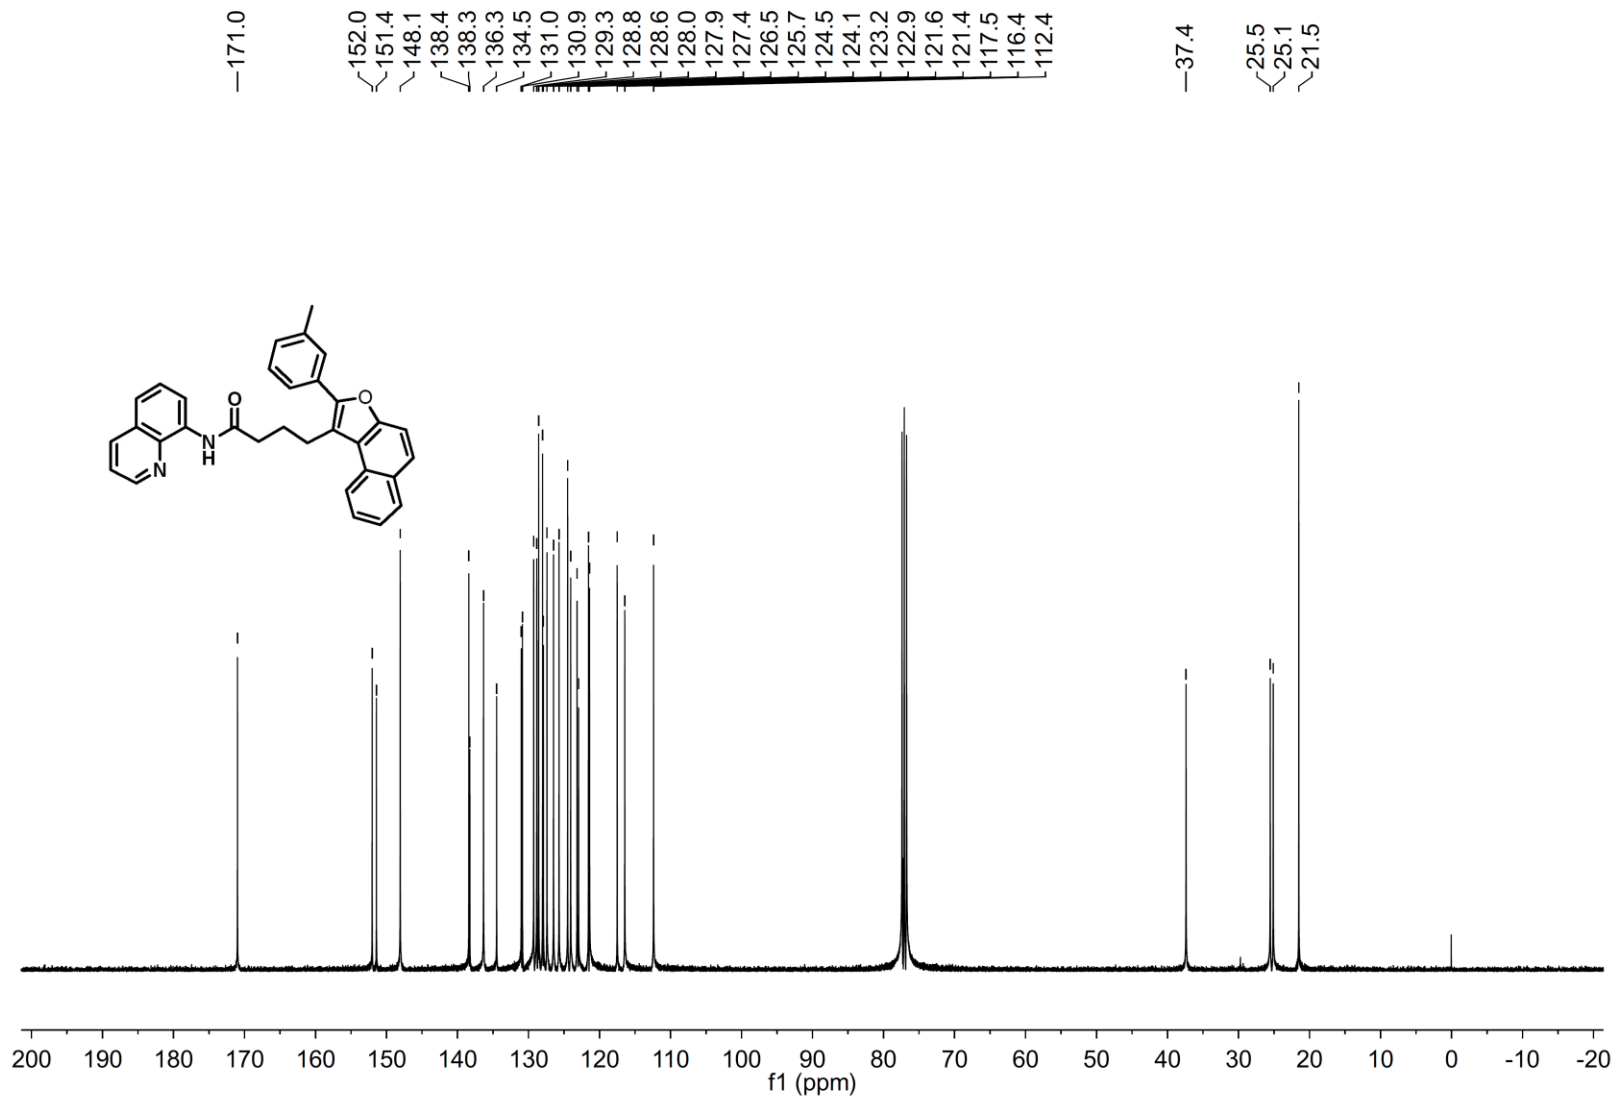

<sup>13</sup>C NMR Spectrum of Compound 3t

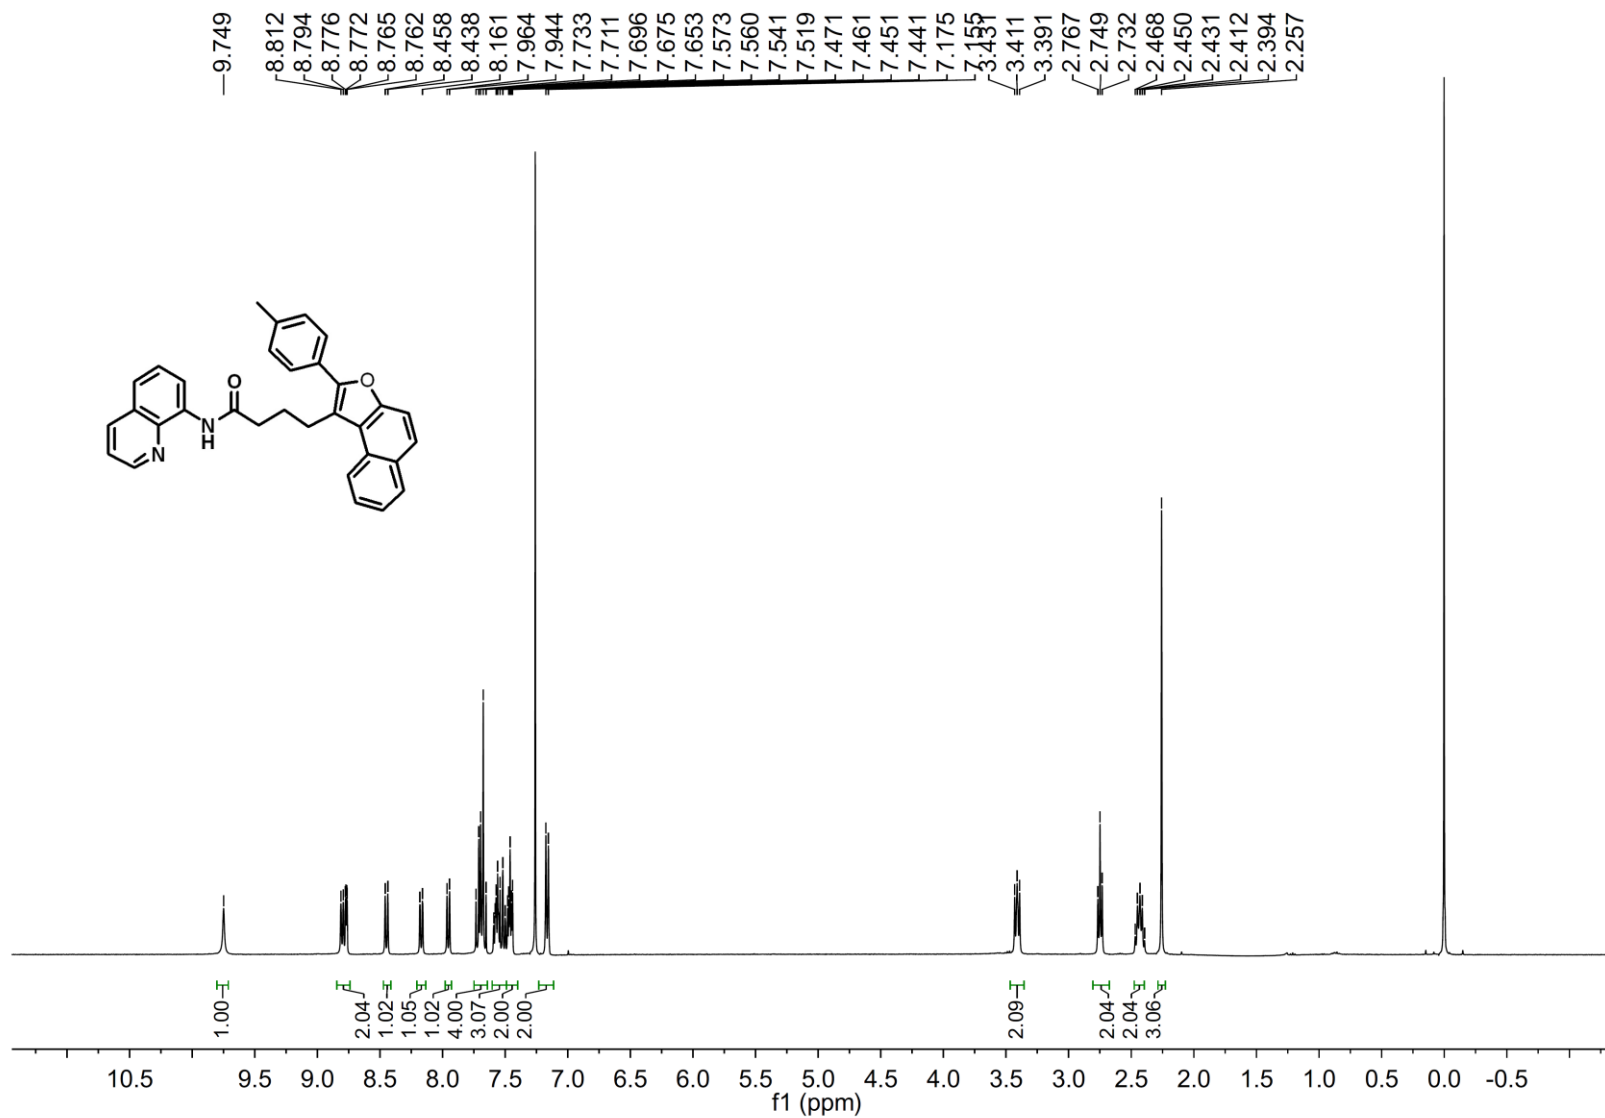

<sup>1</sup>H NMR Spectrum of Compound 3u

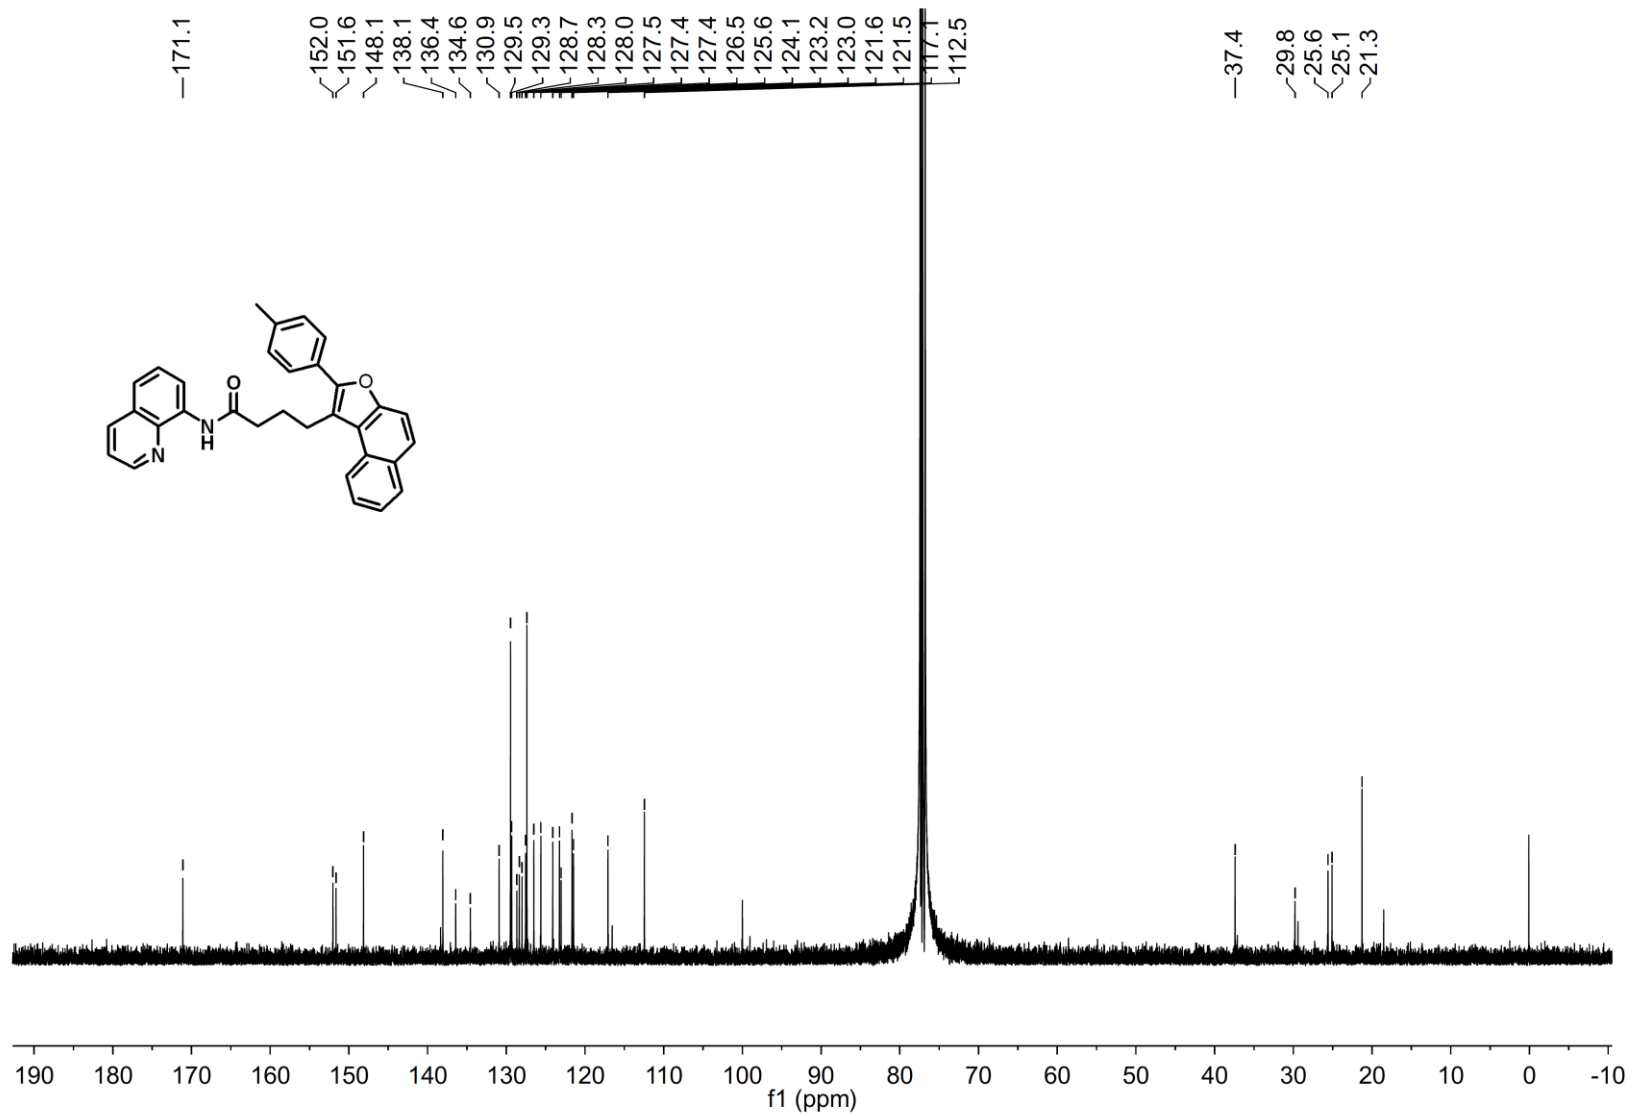

<sup>13</sup>C NMR Spectrum of Compound 3u



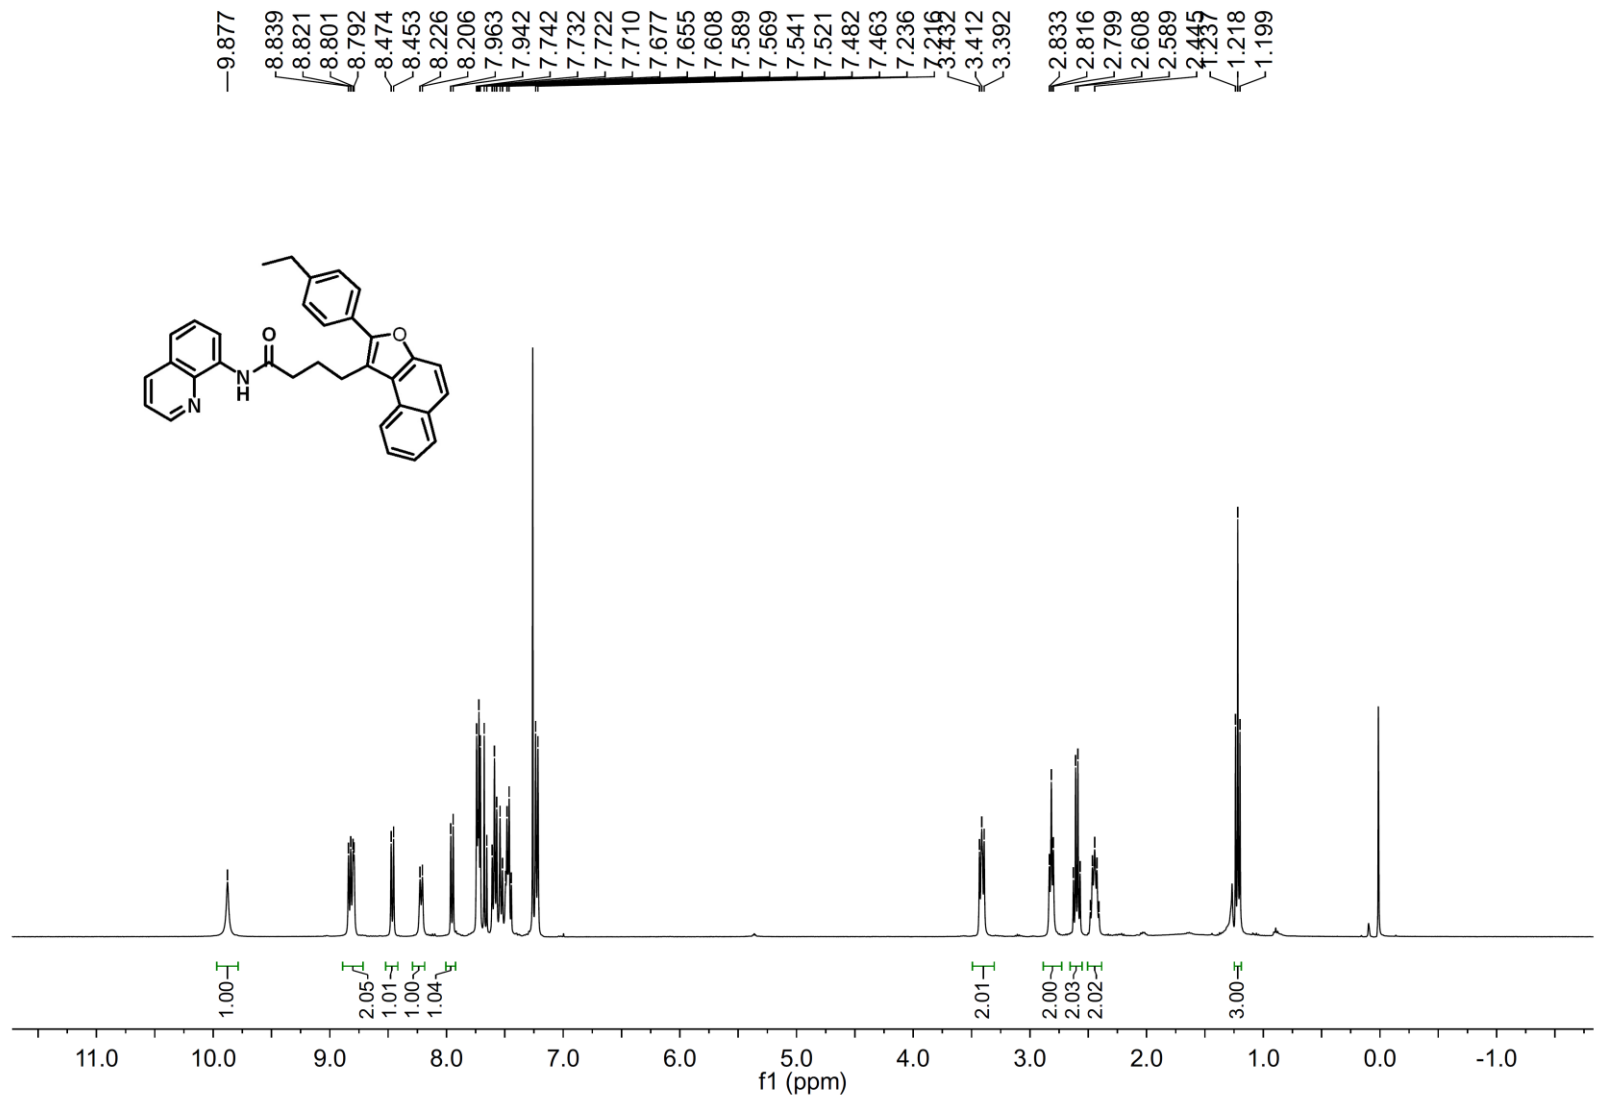

<sup>1</sup>H NMR Spectrum of Compound 3v

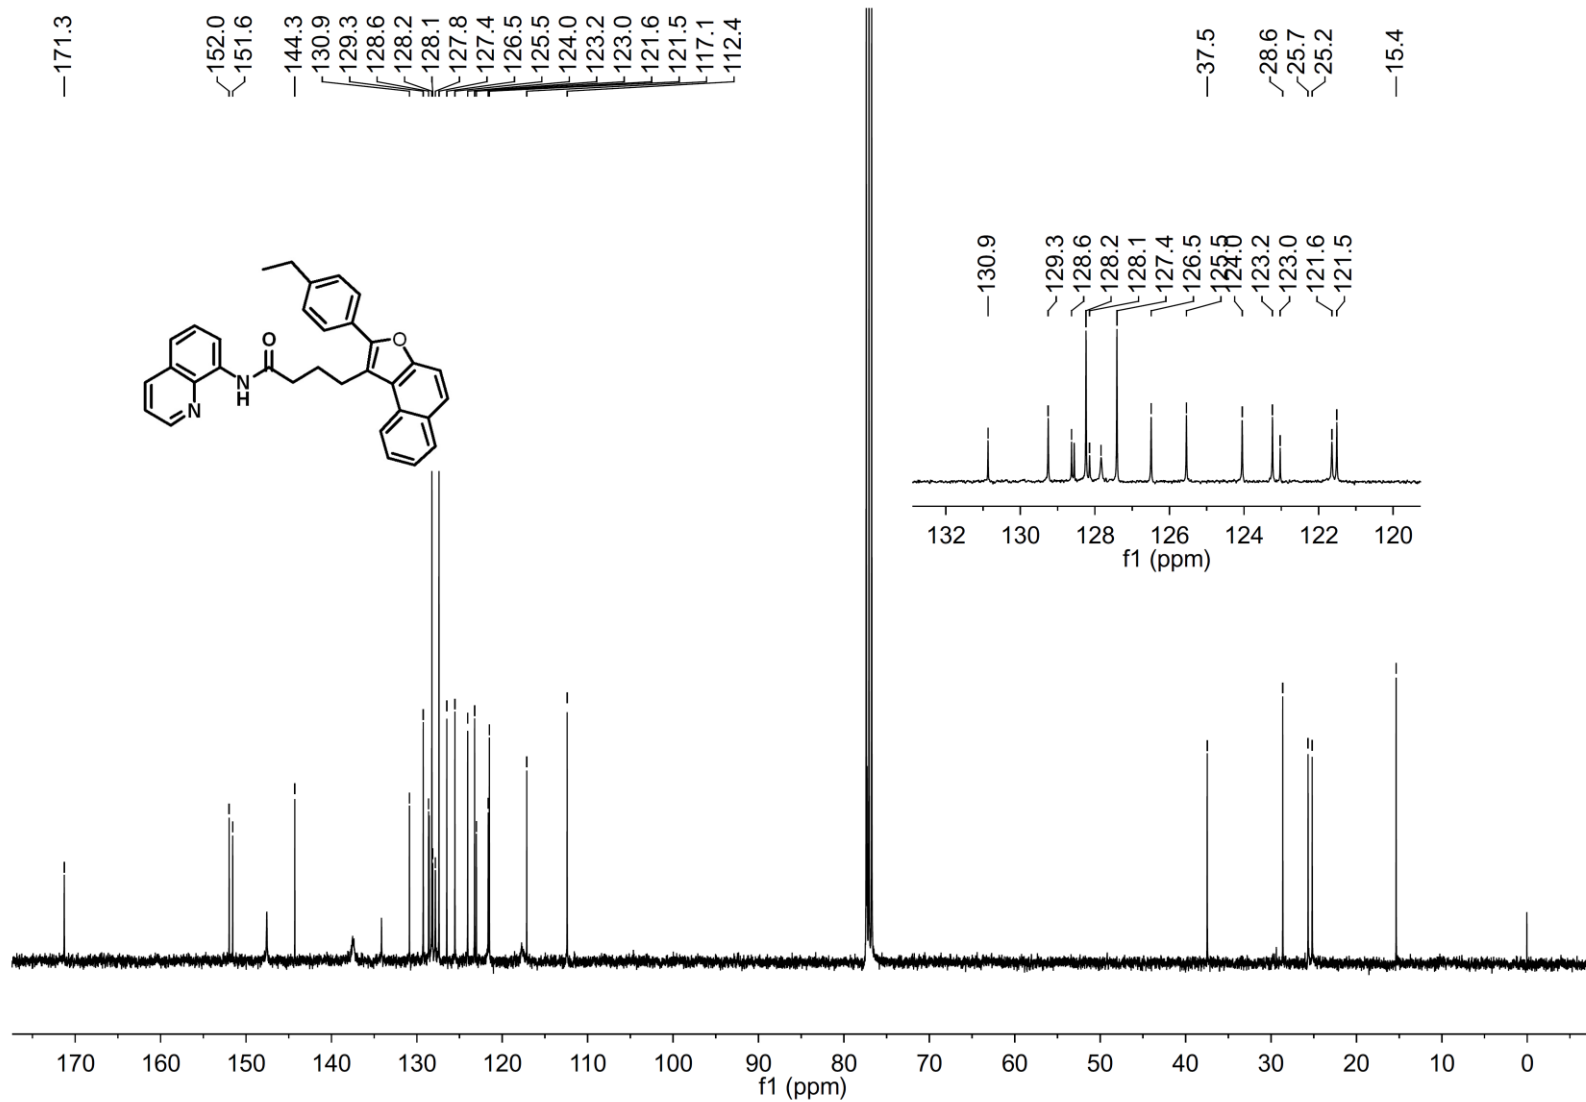

<sup>13</sup>C NMR Spectrum of Compound 3v

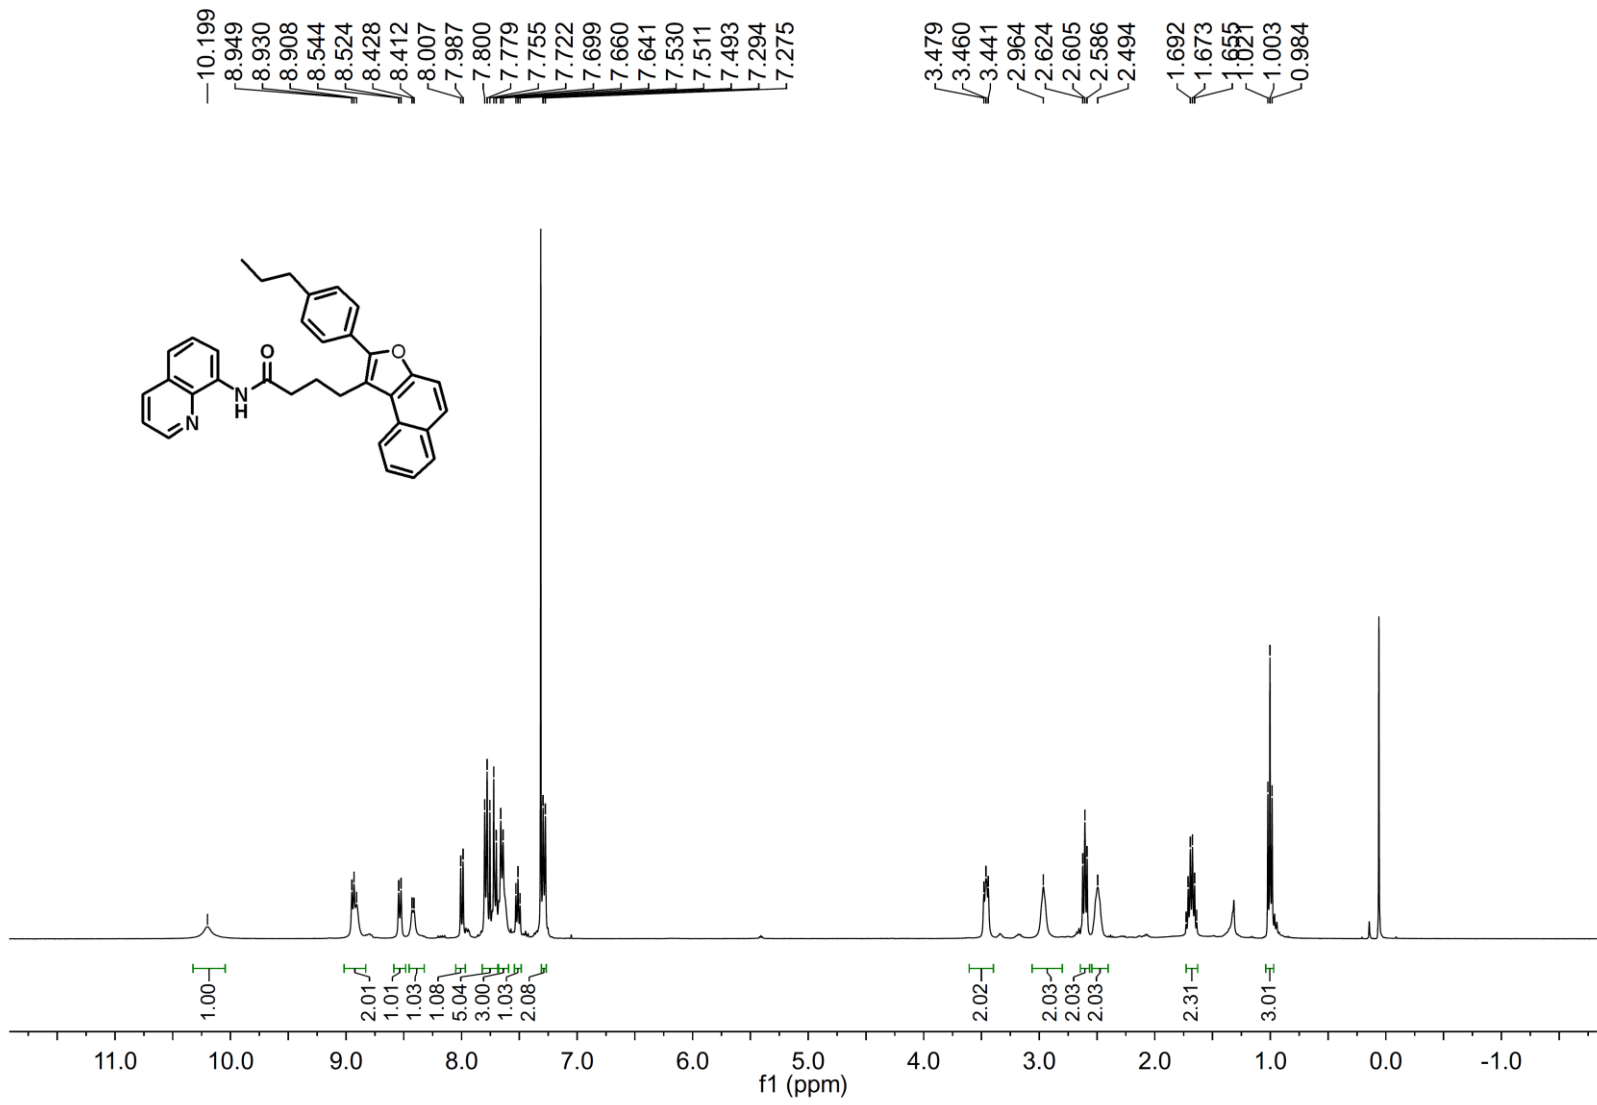

<sup>1</sup>H NMR Spectrum of Compound 3w

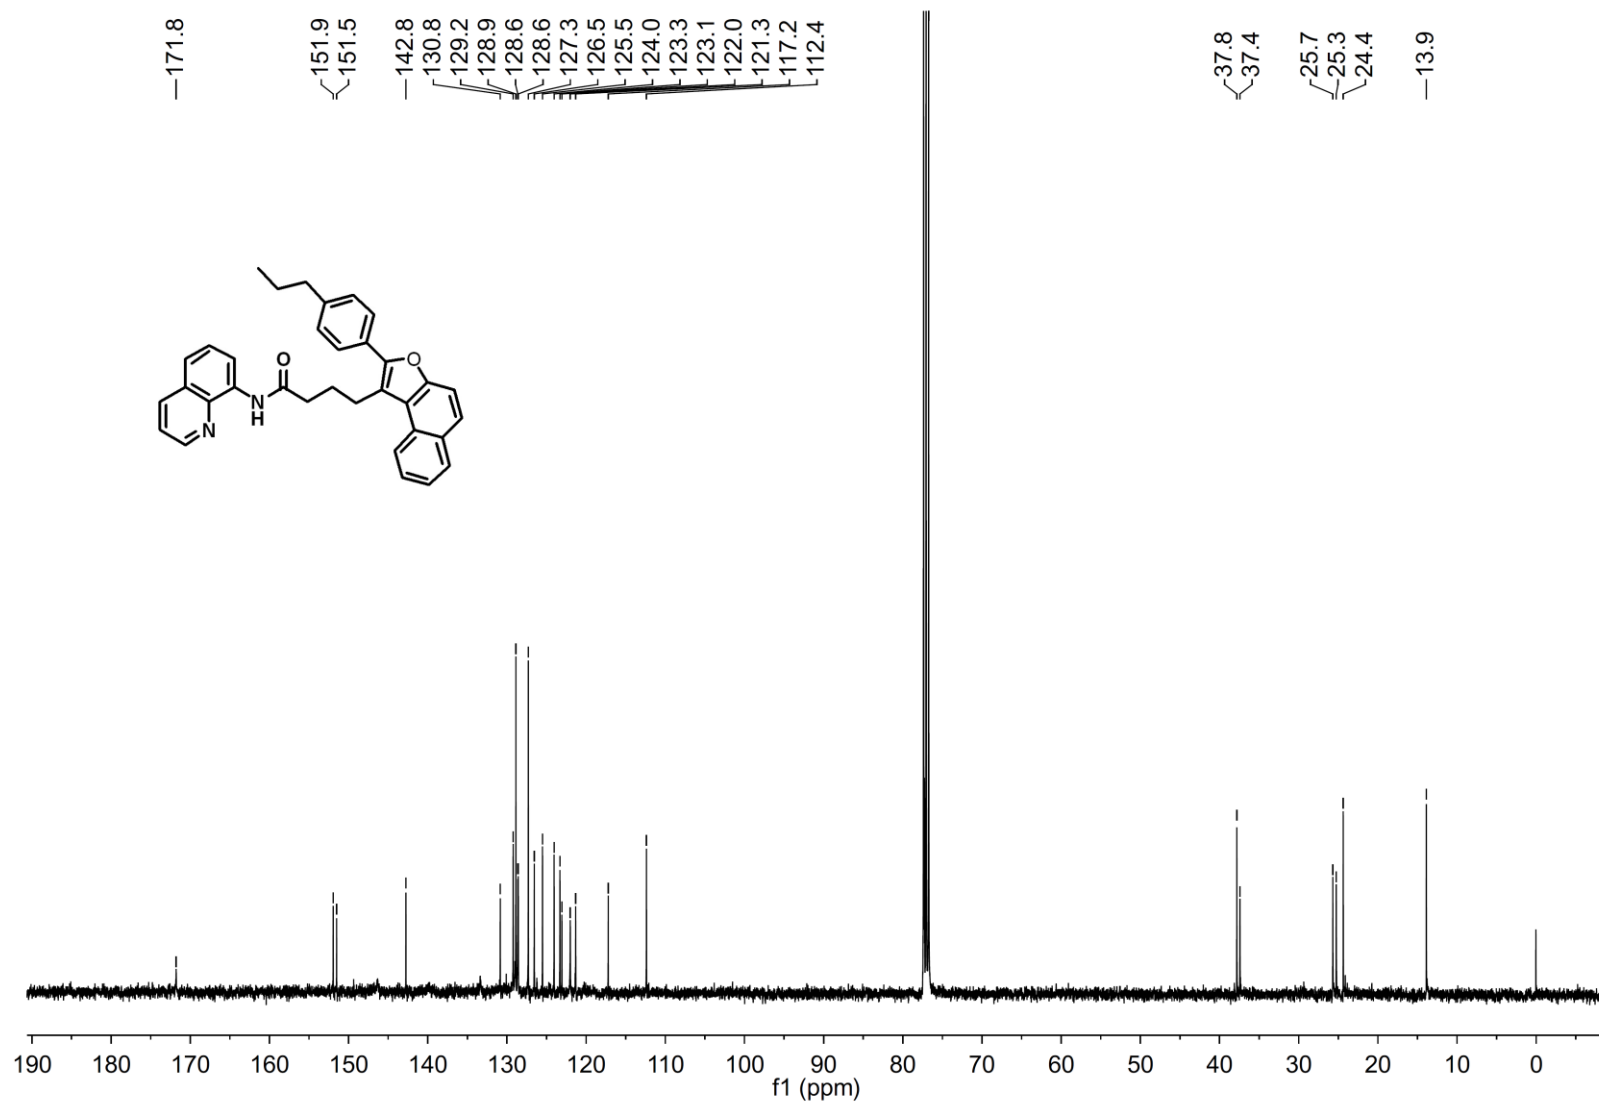

<sup>13</sup>C NMR Spectrum of Compound 3w

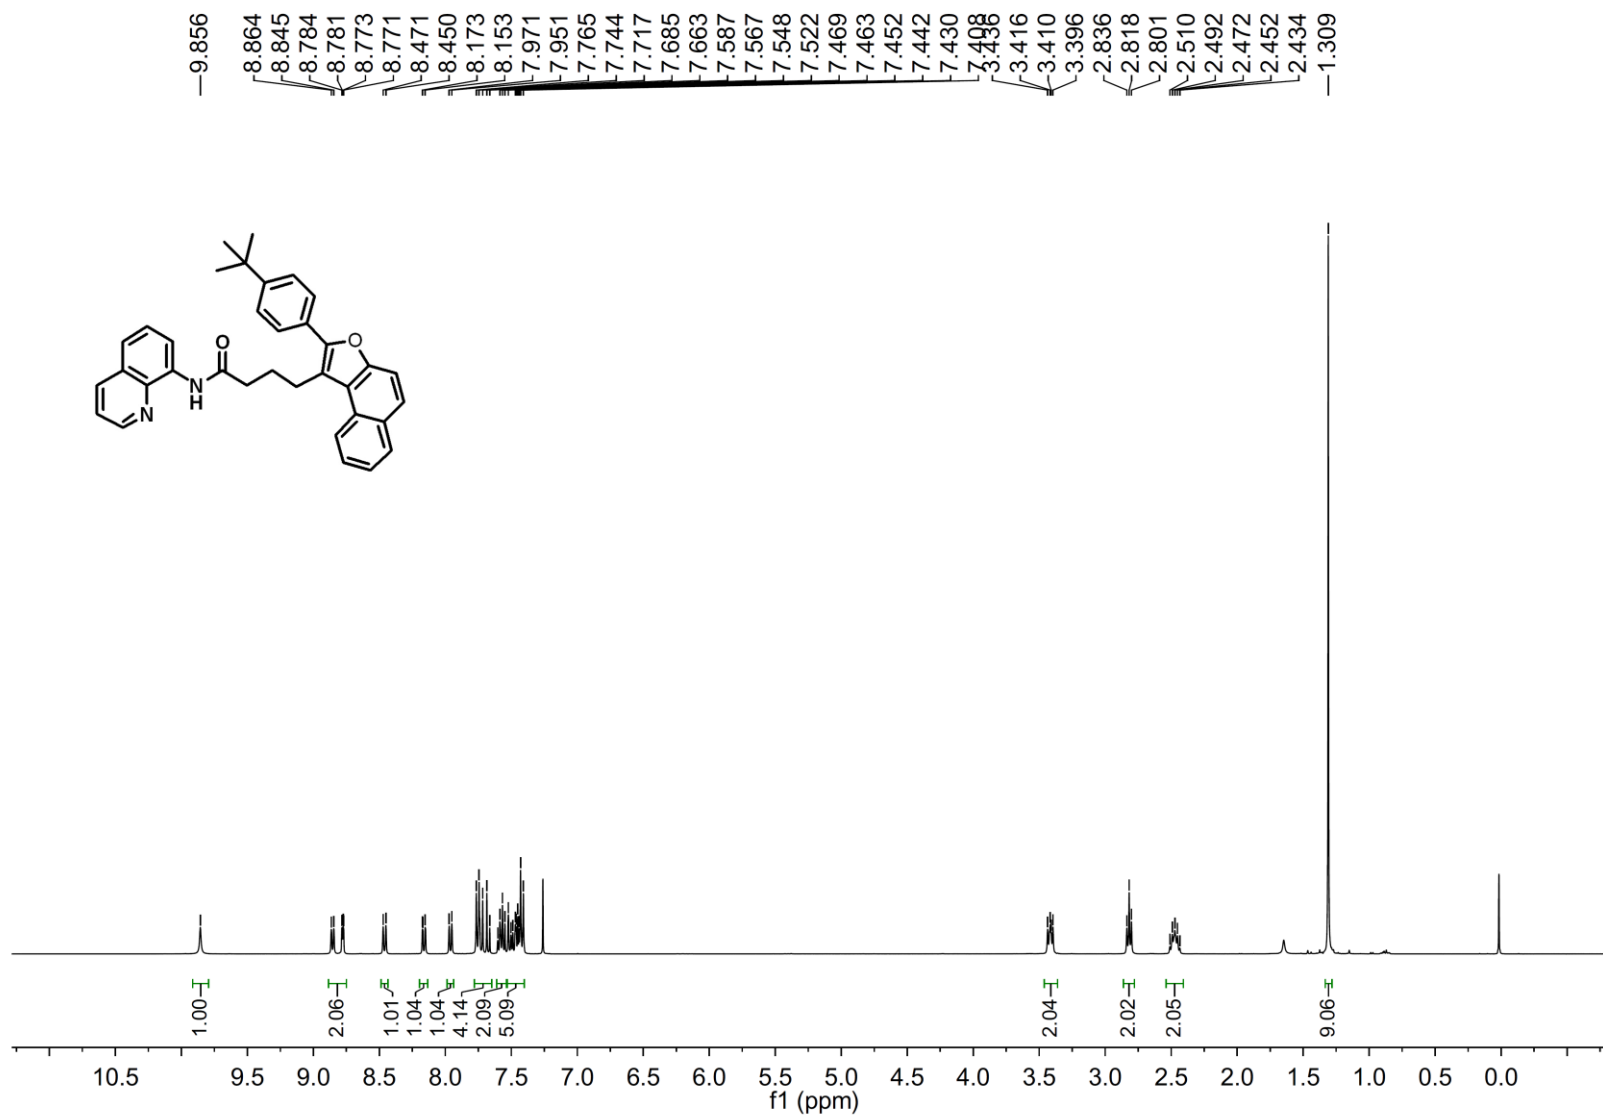

<sup>1</sup>H NMR Spectrum of Compound 3x

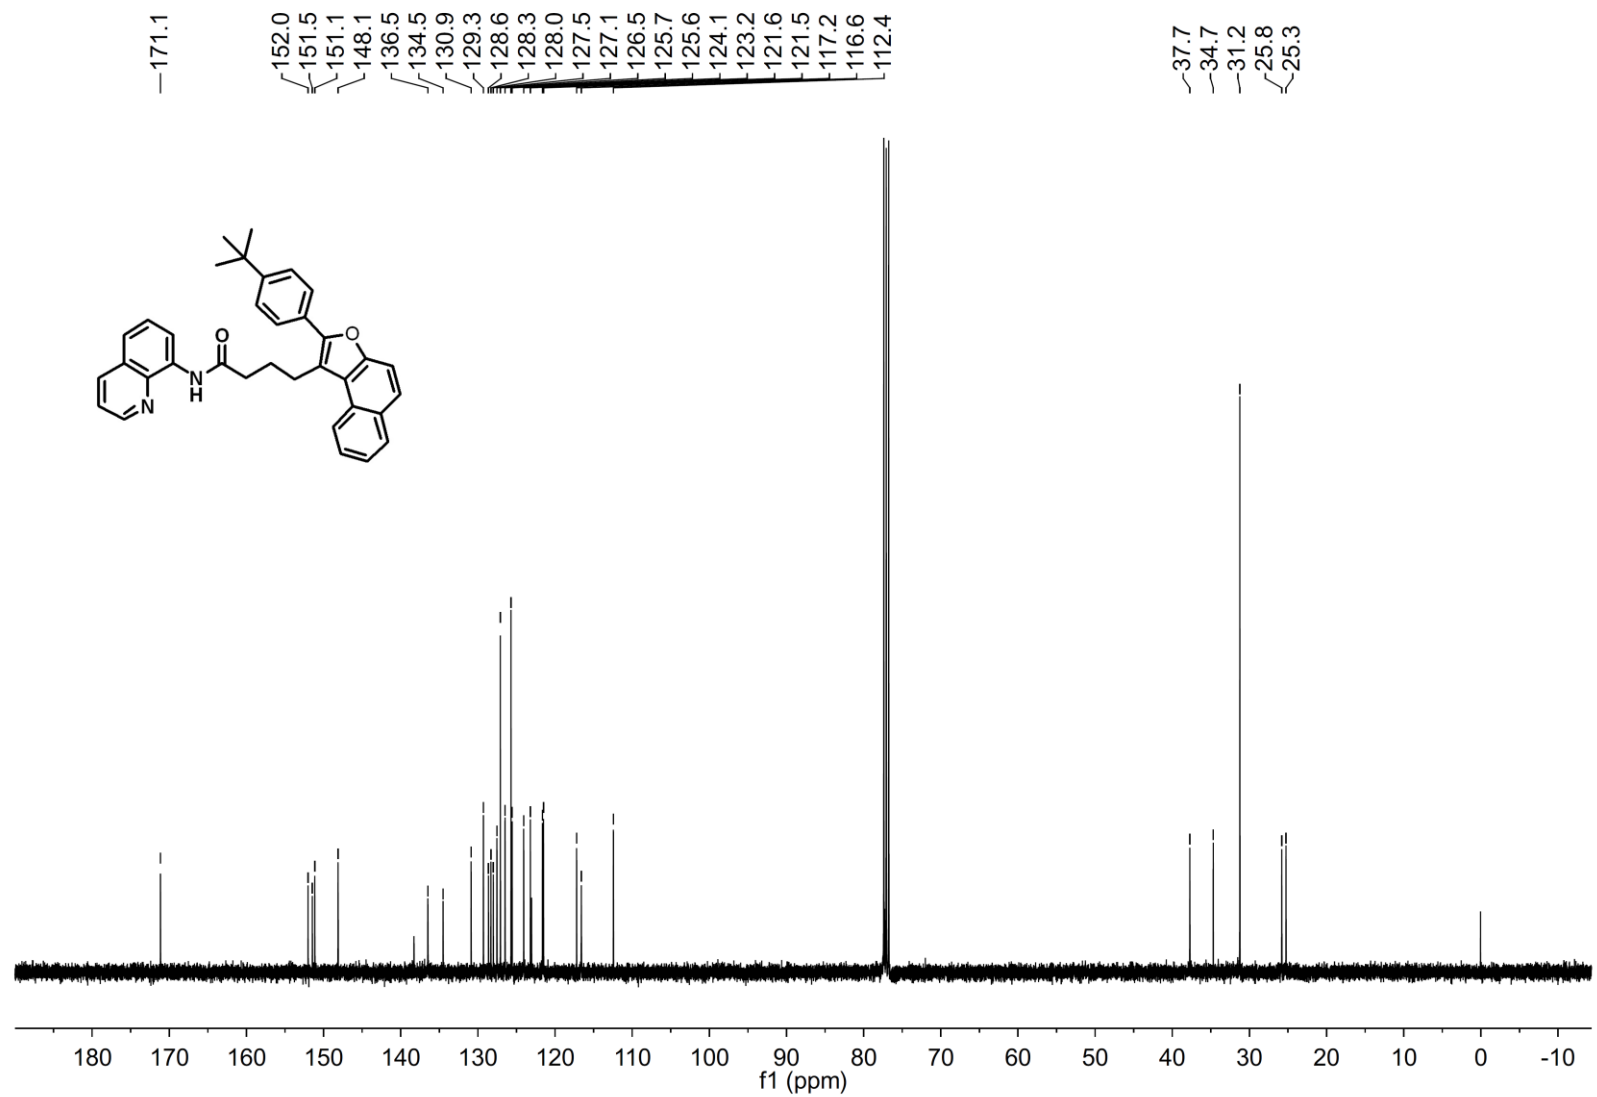

<sup>13</sup>C NMR Spectrum of Compound 3x

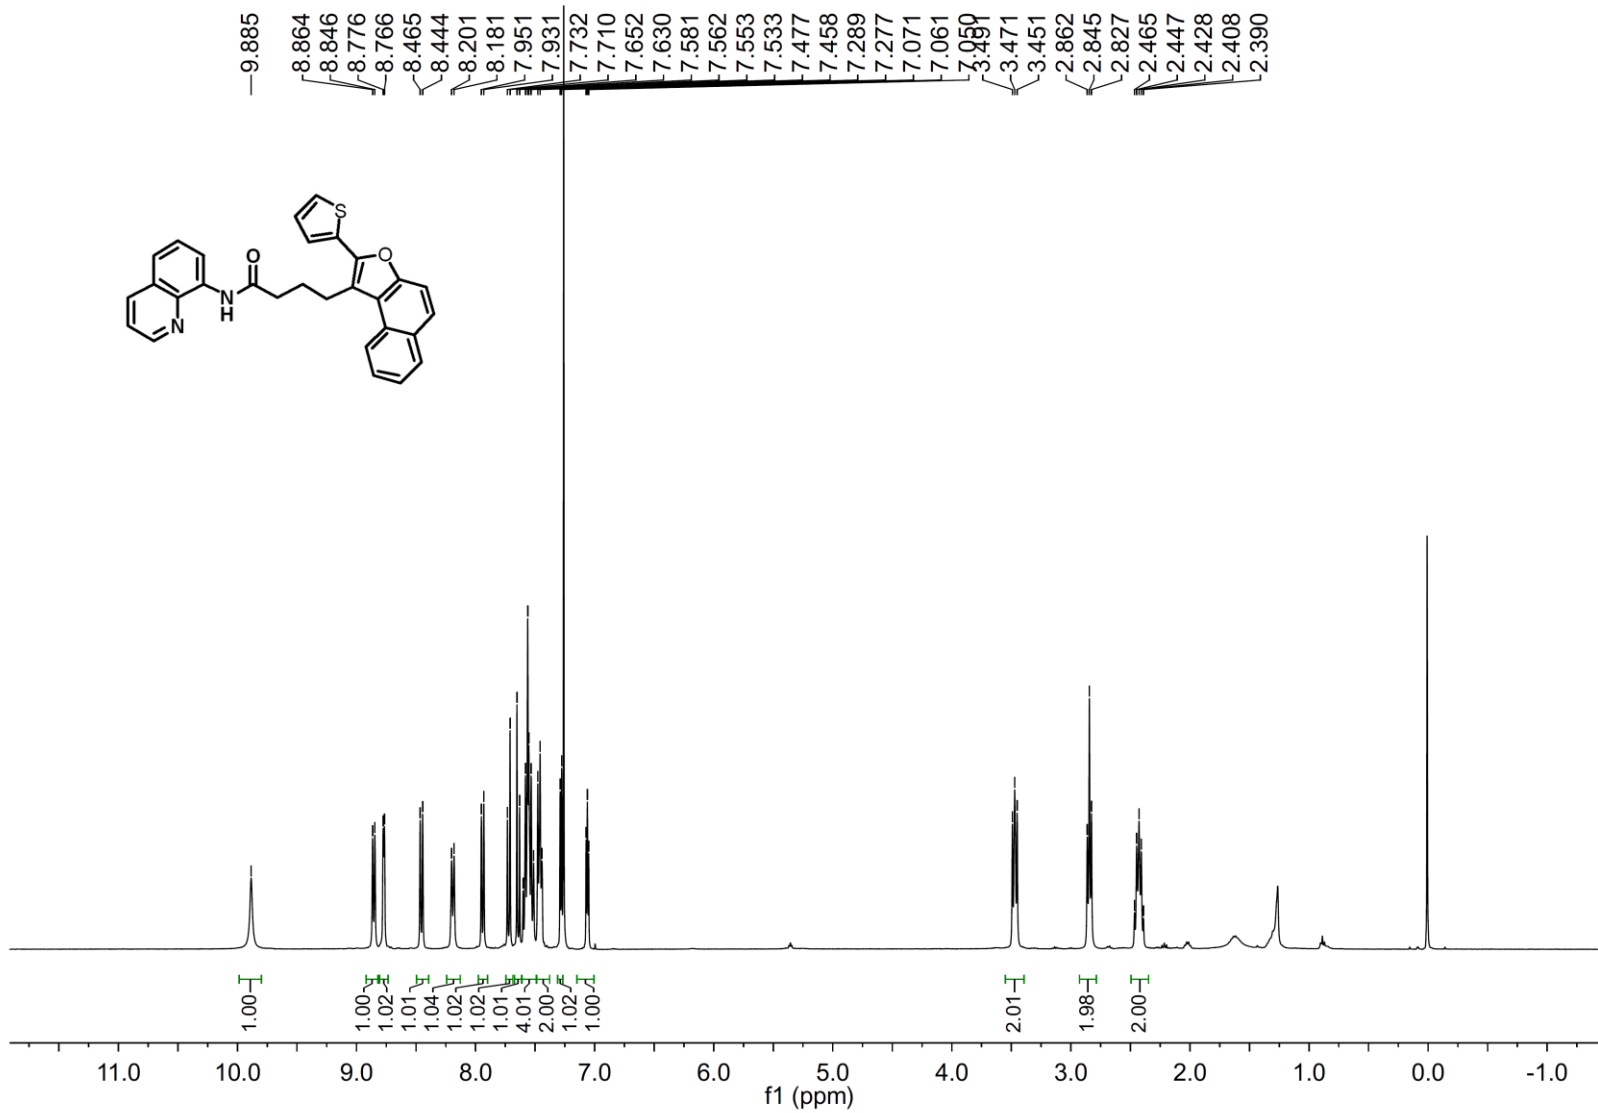

<sup>1</sup>H NMR Spectrum of Compound 3y

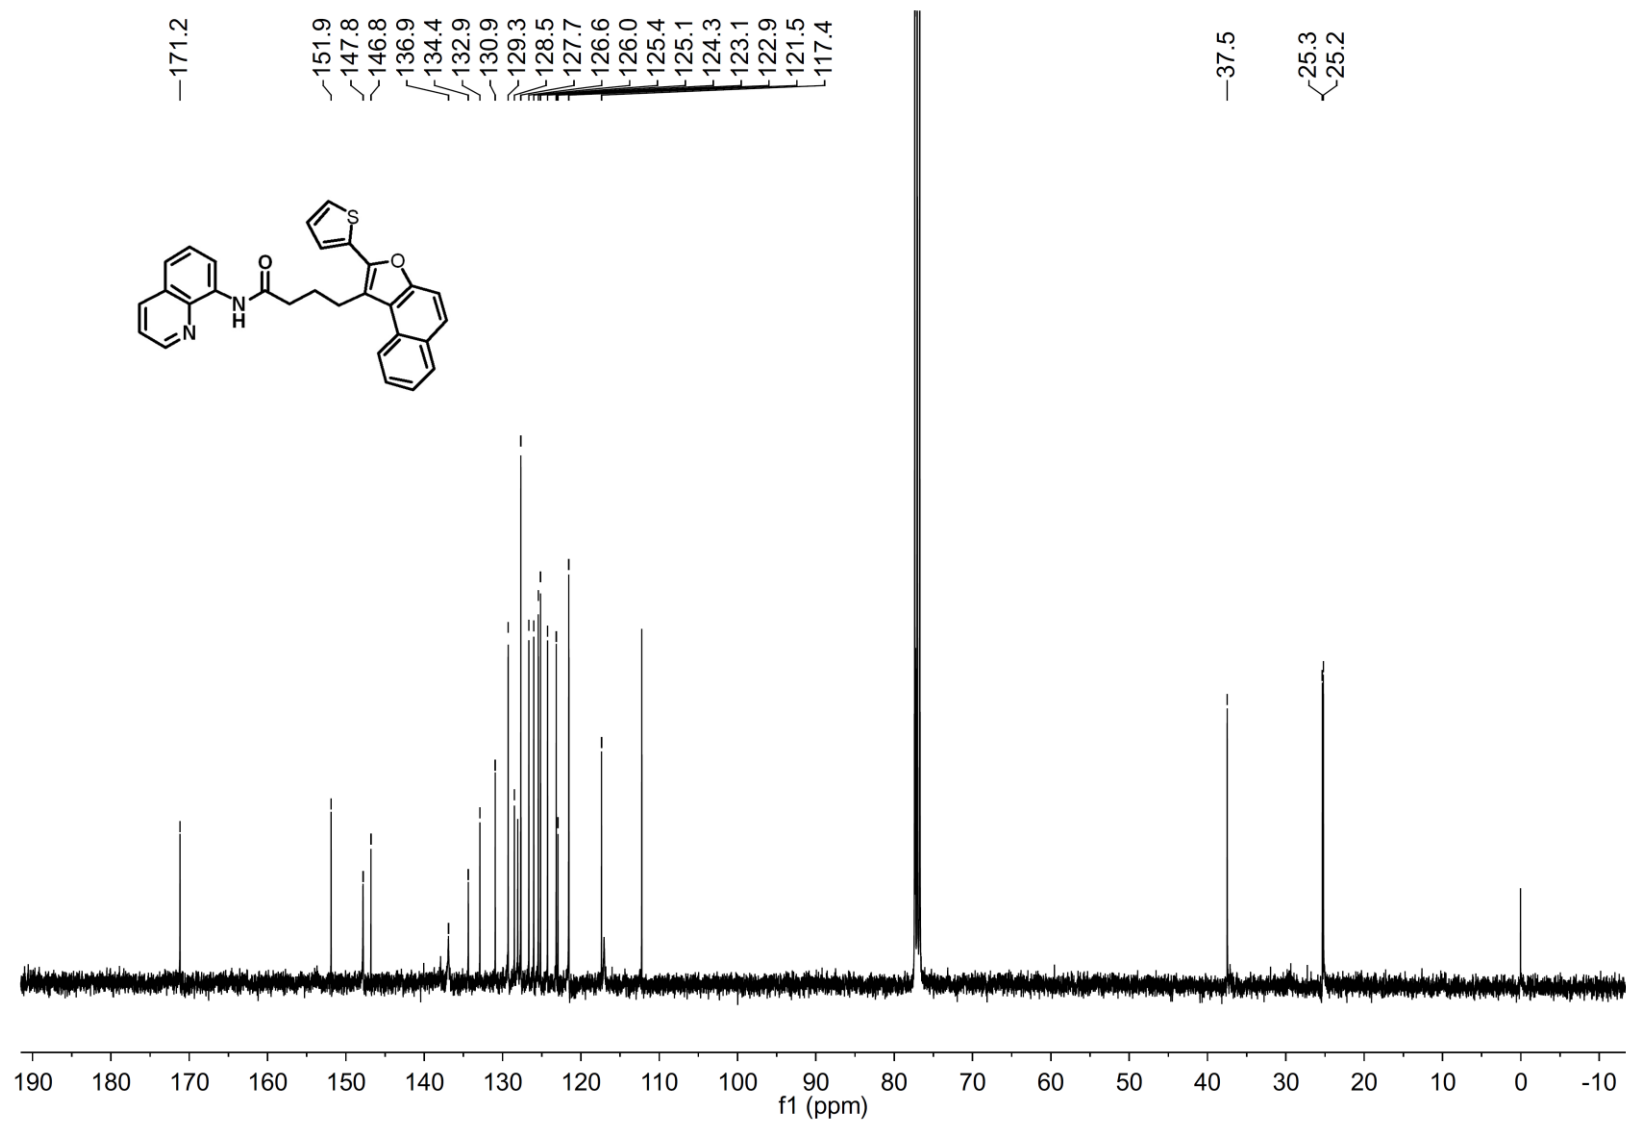

<sup>13</sup>C NMR Spectrum of Compound 3y



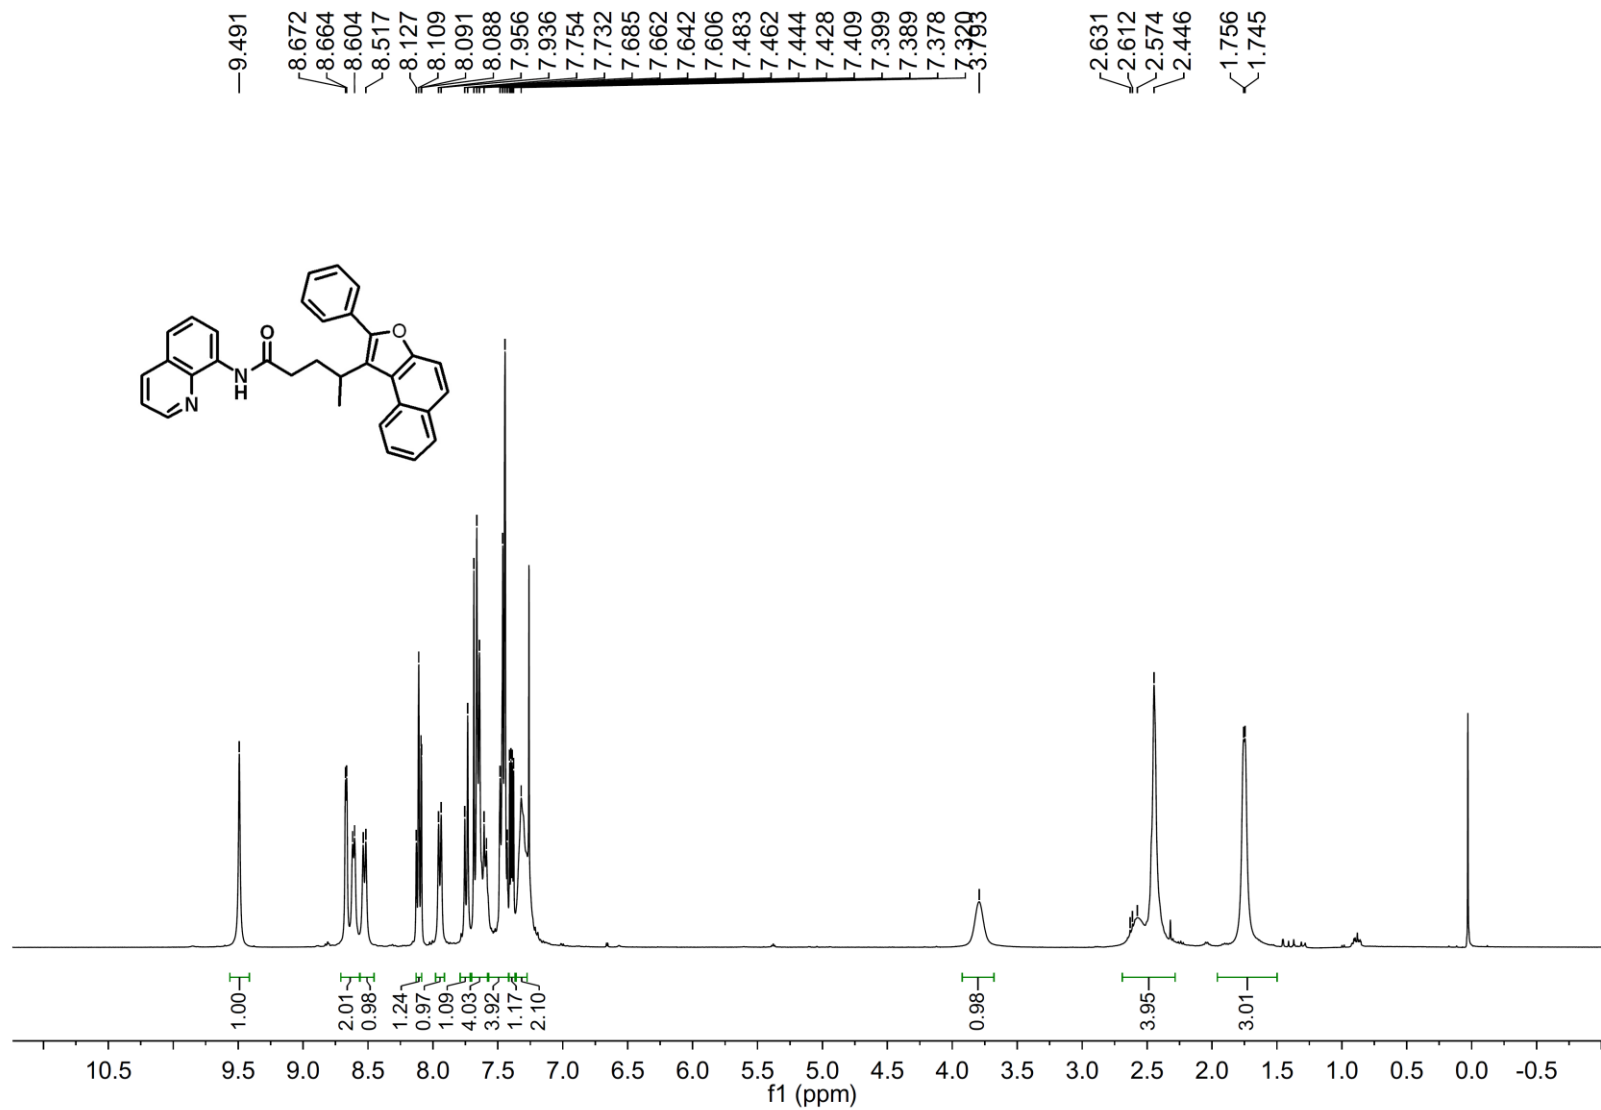

<sup>1</sup>H NMR Spectrum of Compound 3z

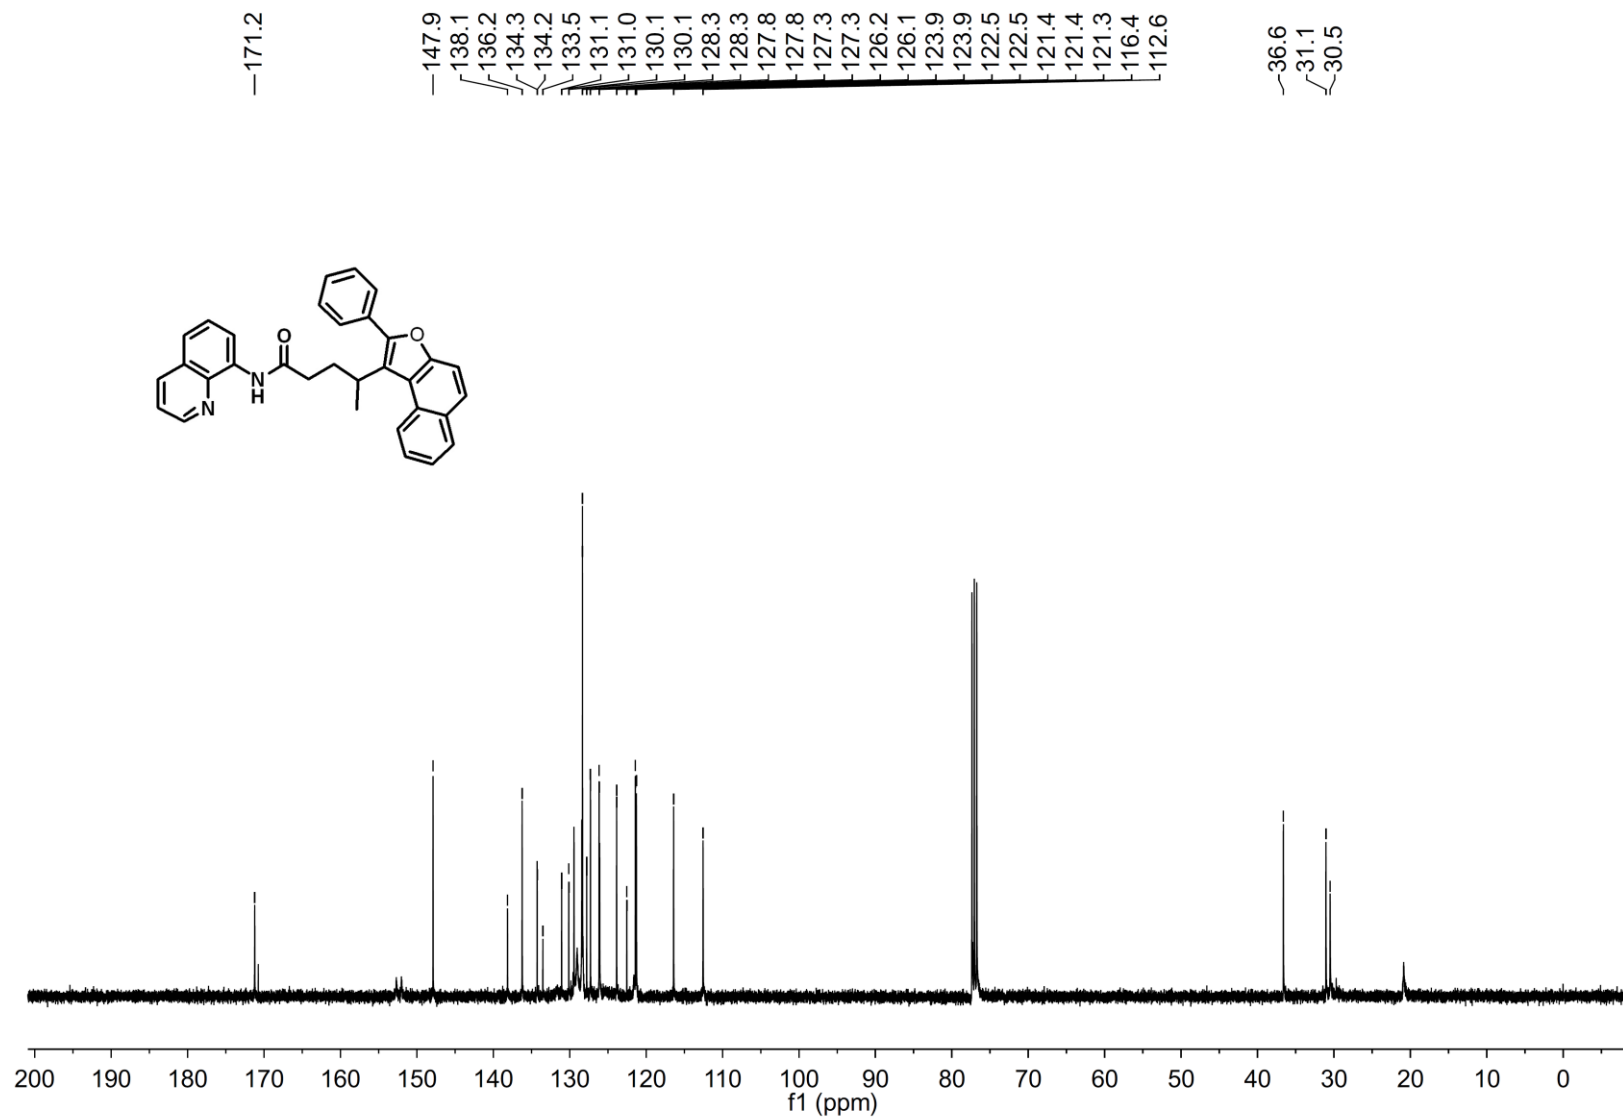

<sup>13</sup>C NMR Spectrum of Compound 3z

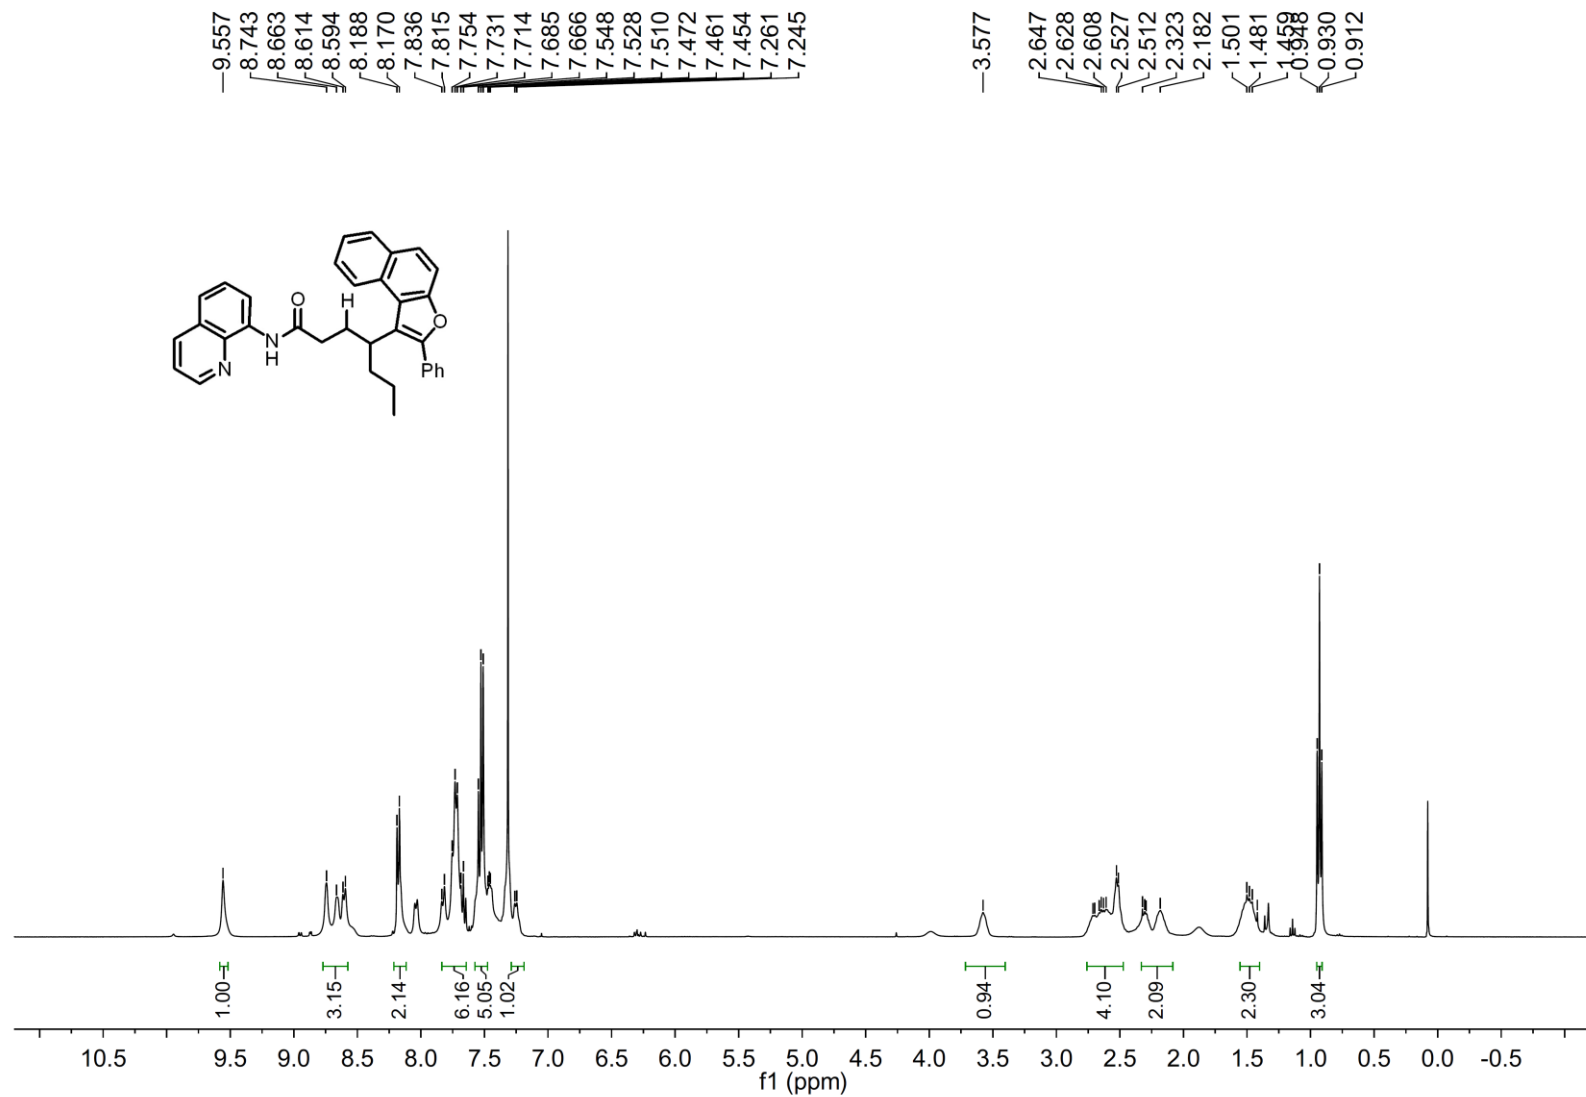

9.557  
8.743  
8.663  
8.614  
8.594  
8.188  
8.170  
7.836  
7.815  
7.754  
7.731  
7.714  
7.685  
7.666  
7.548  
7.528  
7.510  
7.472  
7.461  
7.454  
7.261  
7.245

3.577  
2.647  
2.628  
2.608  
2.527  
2.512  
2.323  
2.182  
1.501  
1.481  
1.458  
0.948  
0.930  
0.912

<sup>1</sup>H NMR Spectrum of Compound 3aa

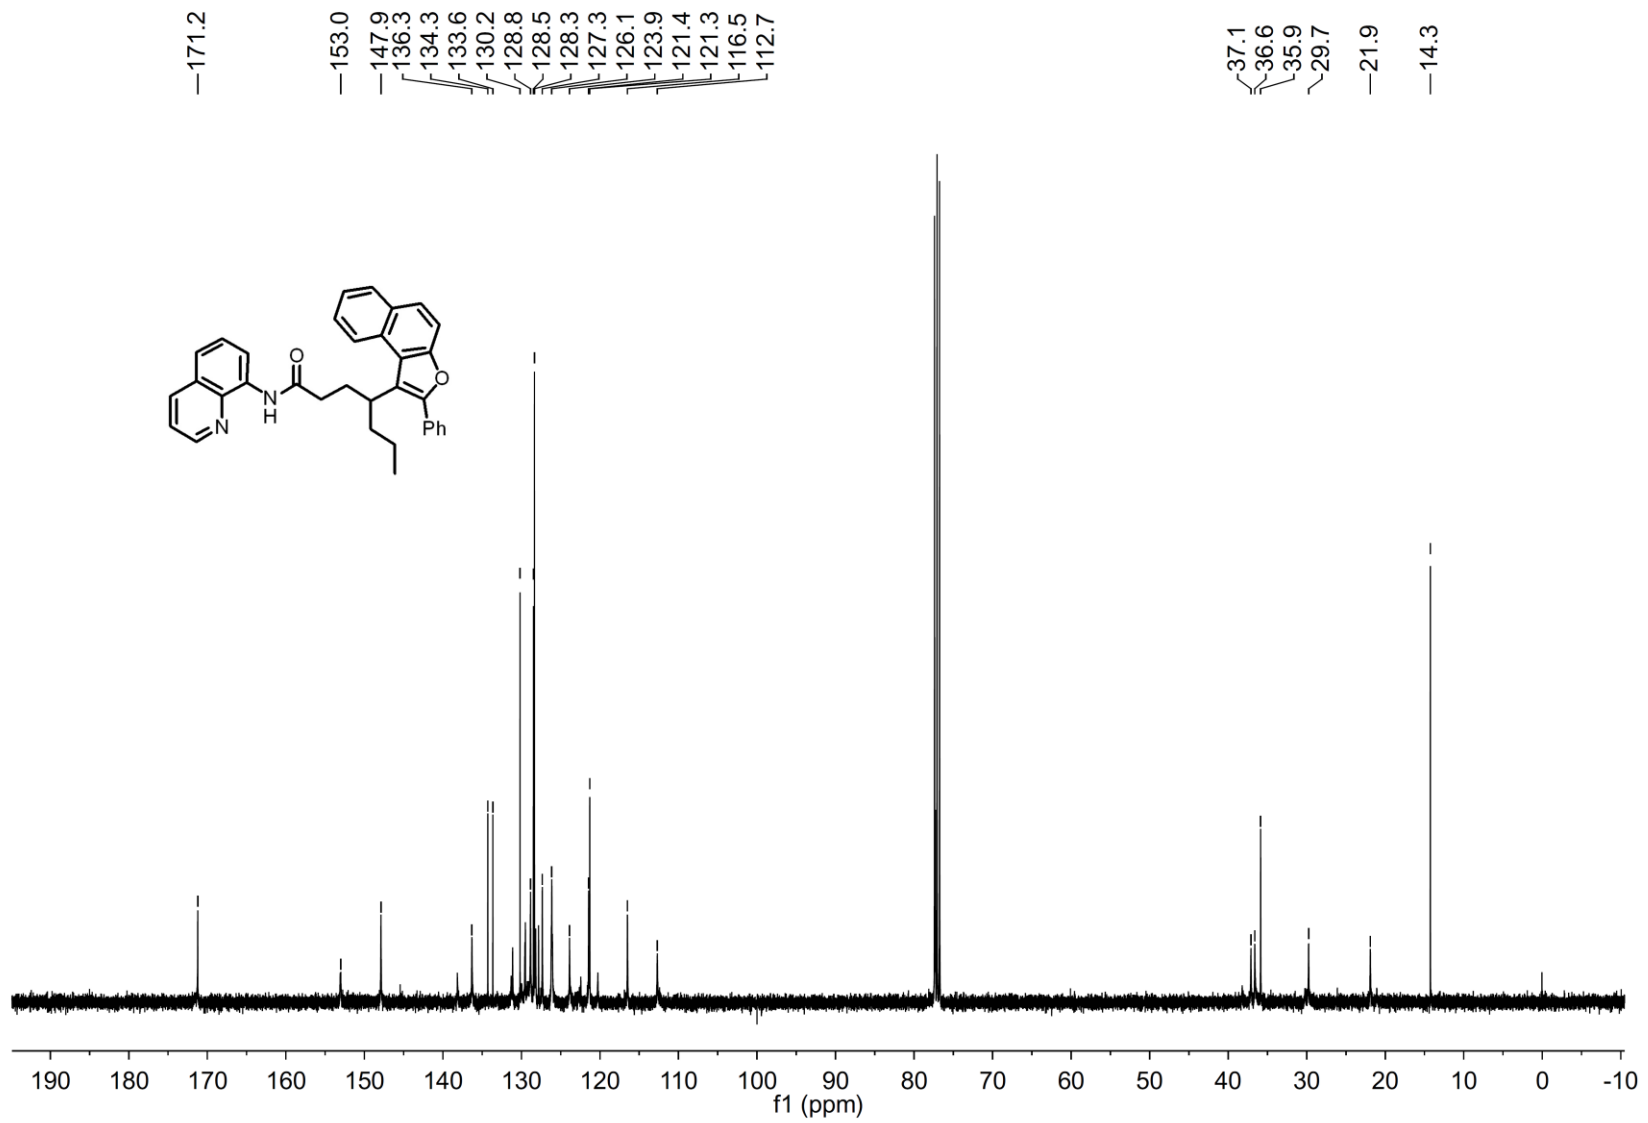

<sup>13</sup>C NMR Spectrum of Compound 3aa

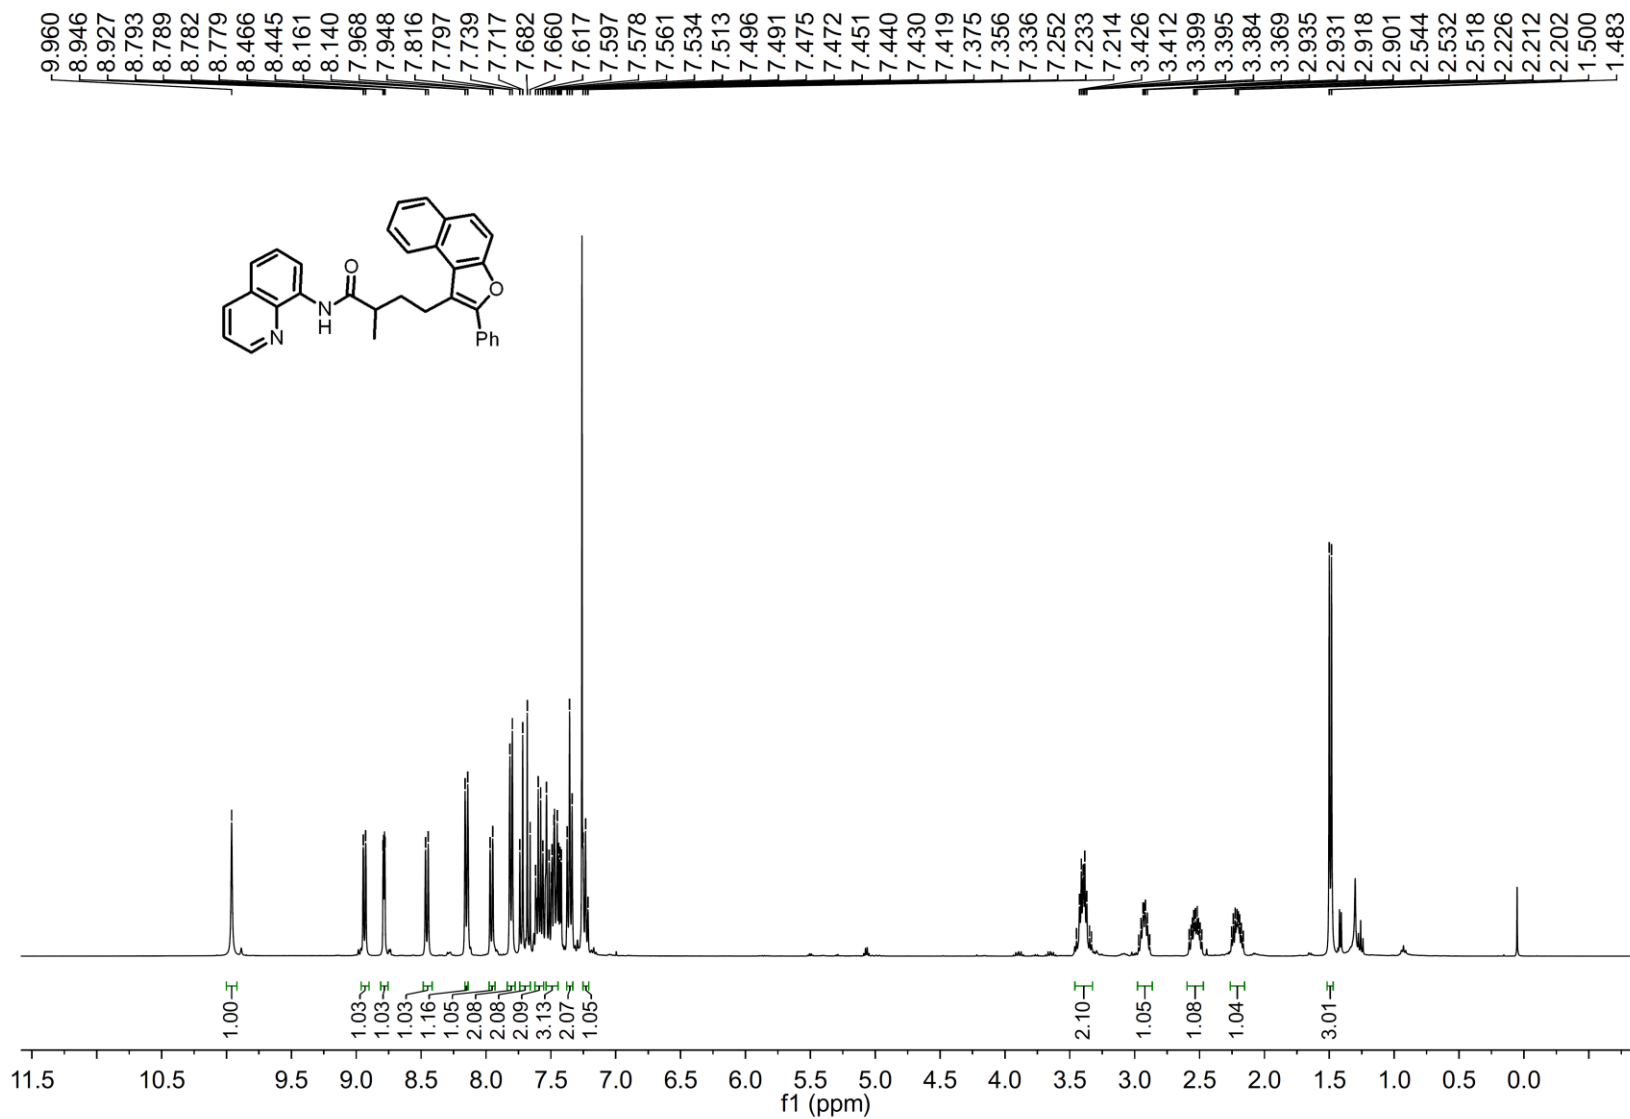

**<sup>1</sup>H NMR Spectrum of Compound 3bb**

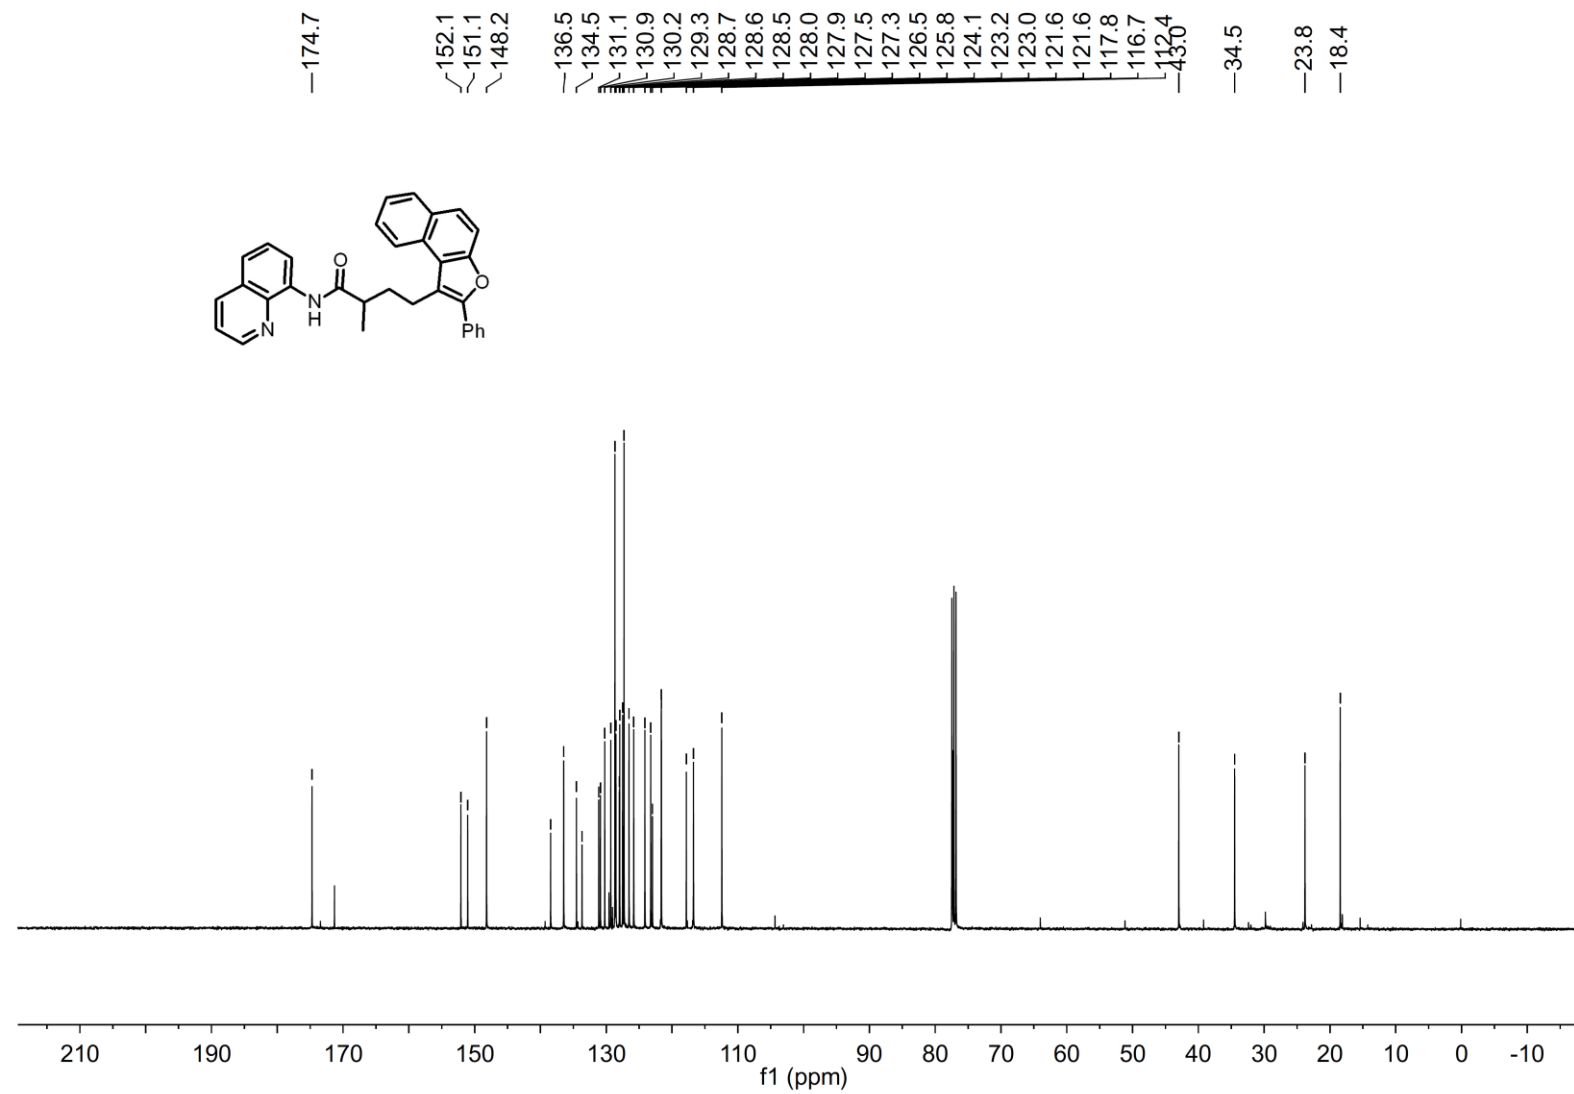

<sup>13</sup>C NMR Spectrum of Compound 3bb

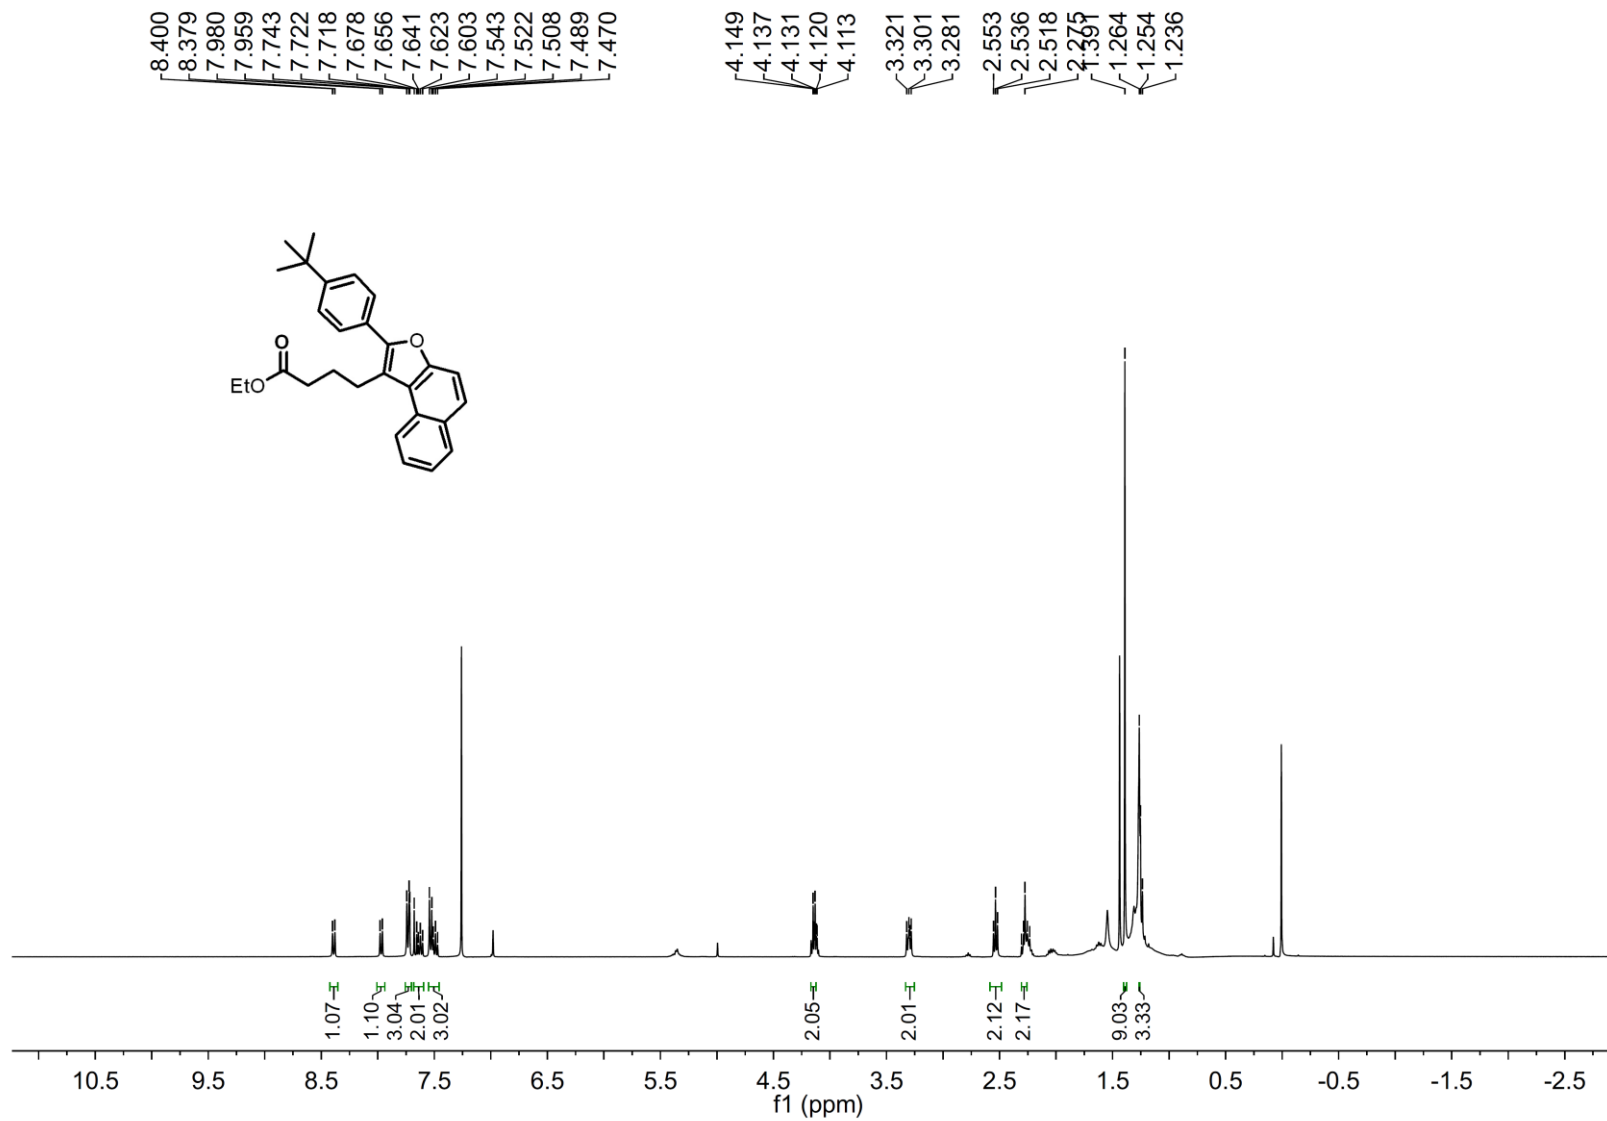

<sup>1</sup>H NMR Spectrum of Compound 6

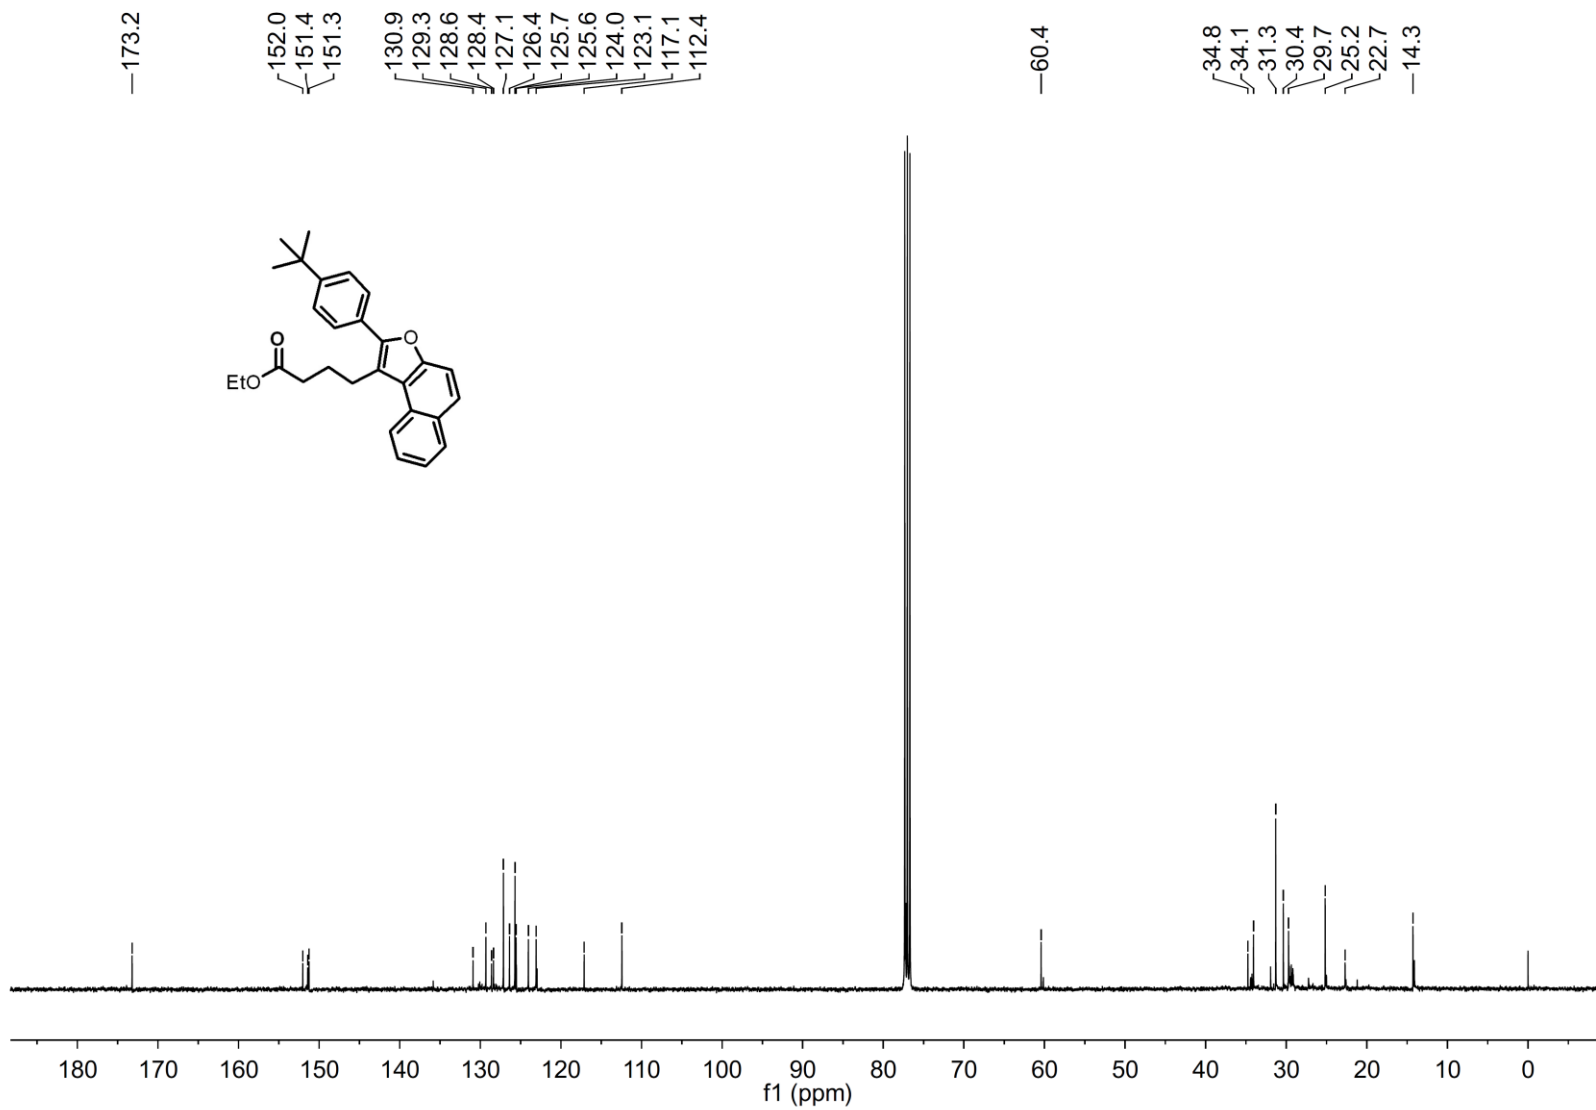

<sup>13</sup>C NMR Spectrum of Compound 6
